# Supplementary material
Source: MDPI journal article supplement (https://www.mdpi.com/2304-6740/6/2/59)
Supplement: s1 [file s1]

Archive with 2 entries (2 files):
- Diammine nickel nitrate.cif
- Diammine-Nickel-Nitrate-checkcif.pdf
