# Supplementary material
Source: MDPI journal article supplement (https://www.mdpi.com/2304-6740/6/2/59)
Supplement: s1 [file s1 › Diammine nickel nitrate.cif]

#=======================================================================
data_DiammineNickelNitrate
#=======================================================================
# start Validation Reply Form
_vrf_ABSMU01_DiammineNickelNitrate
;
PROBLEM: The ratio of given/expected absorption coefficient lies
RESPONSE: Mu as calculated by Jana2006. No absorption correction applied.
;
# end Validation Reply Form


# 5. CHEMICAL DATA

_chemical_name_systematic
; Diammine nickel(II) nitrate
;
_chemical_name_common                    'Diammine nickel nitrate'
_chemical_formula_moiety                 'H6 N4 Ni O6'
_chemical_formula_sum                    'H6 N4 Ni1 O6'
_chemical_formula_weight                 216.8
_chemical_compound_source                'synthesised as described'

#=======================================================================

# 6. POWDER SPECIMEN AND CRYSTAL DATA

_symmetry_cell_setting                   orthorhombic
_symmetry_space_group_name_H-M           'P c a 21'
_symmetry_space_group_name_Hall          'P 2c -2ac'
_symmetry_Int_Tables_number              29

loop_
 _space_group_symop_id
 _space_group_symop_operation_xyz
 1   x,y,z
 2   -x,-y,z+1/2
 3   x+1/2,-y,z
 4   -x+1/2,y,z+1/2

_cell_length_a                           11.0628(5)
_cell_length_b                           6.0454(3)
_cell_length_c                           9.3526(4)
_cell_angle_alpha                        90
_cell_angle_beta                         90
_cell_angle_gamma                        90
_cell_volume                             625.49(5)


_cell_formula_units_Z                    4
_cell_measurement_temperature            293
_cell_special_details
; ?
;

_exptl_crystal_density_diffrn            2.3018
_exptl_crystal_F_000                     440

_pd_spec_size_axial                      0.7
_pd_spec_size_equat                      5
_pd_spec_size_thick                      'special glass capillary'
_pd_spec_shape                           cylinder
_pd_char_particle_morphology             'irregular powder, visual examination'
_pd_char_colour                          'green'
_pd_prep_temperature                     473

_exptl_absorpt_coefficient_mu            4.578
_exptl_absorpt_correction_type           none

#=======================================================================

# 7. EXPERIMENTAL DATA

_pd_instr_location
; University of Glasgow
;
_pd_calibration_special_details
; Factory Settings
;

_diffrn_ambient_temperature              293
_diffrn_source                           'sealed X-ray tube'
_diffrn_source_target                   Cu
_diffrn_source_type                       'Bruker d8'
_diffrn_radiation_type                   'Cu K\a~1~'
_diffrn_radiation_wavelength             1.54056
_diffrn_radiation_monochromator          'Ge 111'
_diffrn_measurement_device_type          'Bruker d8'
_diffrn_detector                         'sealed Xe-CO2 gas detector'
_diffrn_detector_type                    'VANTEC-1 PSD'

_pd_meas_number_of_points                4120
_pd_meas_2theta_range_min                5.000
_pd_meas_2theta_range_max                107.975
_pd_meas_2theta_range_inc                0.025

_diffrn_radiation_probe                  x-ray

#=======================================================================

# 8. REFINEMENT DATA

_pd_proc_ls_special_details
; ?
;
_pd_proc_ls_profile_function             'Pseudo-Voigt'
_pd_proc_ls_background_function          '16 Legendre polynoms'
_pd_proc_ls_pref_orient_corr             none
_pd_proc_ls_prof_R_factor                0.0438
_pd_proc_ls_prof_wR_factor               0.0603
_pd_proc_ls_prof_wR_expected             0.0240


_refine_ls_R_factor_gt                   0.0333
_refine_ls_wR_factor_gt                  0.0443
_refine_ls_R_factor_all                  0.0335
_refine_ls_wR_factor_all                 0.0443
_refine_ls_goodness_of_fit_all           2.51
_refine_ls_number_parameters             68
_refine_ls_number_restraints             0
_refine_ls_number_constraints            2
_refine_ls_weighting_scheme              sigma
_refine_ls_hydrogen_treatment            'constr'
_refine_ls_shift/su_max                  0.0402
_refine_ls_shift/su_mean                 0.0025
_refine_diff_density_max                 0.38
_refine_diff_density_min                 -0.37
_refine_ls_extinction_method             ?
_refine_ls_extinction_coef               ?

_pd_proc_2theta_range_min                5
_pd_proc_2theta_range_max                107.975
_pd_proc_2theta_range_inc                0.025
_pd_proc_wavelength                      1.54051

loop_
 _atom_type_symbol
 _atom_type_scat_dispersion_real
 _atom_type_scat_dispersion_imag
 _atom_type_scat_source
 H    0.0000  0.0000
 'International Tables Vol C tables 4.2.6.8 and 6.1.1.1'
 N    0.0329  0.0188
 'International Tables Vol C tables 4.2.6.8 and 6.1.1.1'
 Ni  -3.1187  0.5234
 'International Tables Vol C tables 4.2.6.8 and 6.1.1.1'
 O    0.0516  0.0335
 'International Tables Vol C tables 4.2.6.8 and 6.1.1.1'

_computing_cell_refinement               'Jana2006 (Petricek et al., 2006)'
_computing_data_reduction                 'Jana2006 (Petricek et al., 2006)'
_computing_structure_solution            'Superflip (Palatinus & Chapuis, 2007)'
_computing_structure_refinement          'Jana2006 (Petricek et al., 2006)'
_computing_molecular_graphics            'Diamond 3.1 (Brandenburg, 2005)'

#=======================================================================

# 9. ATOMIC COORDINATES AND DISPLACEMENT PARAMETERS

loop_
 _atom_site_label
 _atom_site_type_symbol
 _atom_site_fract_x
 _atom_site_fract_y
 _atom_site_fract_z
 _atom_site_adp_type
 _atom_site_U_iso_or_equiv
 _atom_site_site_symmetry_multiplicity
 _atom_site_occupancy
 _atom_site_calc_flag
 _atom_site_refinement_flags
 _atom_site_disorder_assembly
 _atom_site_disorder_group
  Ni1 Ni 0.6259(4) 0.7263(9) 0.9218(11) Uiso 0.0128(16) 4 1 d . . .
  O22 O 0.722(2) 0.786(3) 0.729(2) Uiso 0.005(6) 4 1 d . . .
  N11 N 0.483(5) 0.509(8) 0.687(5) Uiso 0.020(14) 4 1 d . . .
  O11 O 0.517(3) 0.484(4) 0.811(3) Uiso 0.011(9) 4 1 d . . .
  N2 N 0.741(2) 0.482(3) 0.969(4) Uiso 0.009(4) 4 1 d . . .
  O23 O 0.714(2) 1.143(3) 0.732(3) Uiso 0.014(8) 4 1 d . . .
  N1 N 0.495(2) 0.973(3) 0.887(4) Uiso 0.009(4) 4 1 d . . .
  O21 O 0.726(3) 0.971(3) 1.039(3) Uiso 0.005(6) 4 1 d . . .
  O12 O 0.518(2) 0.680(4) 1.119(3) Uiso 0.017(8) 4 1 d . . .
  O13 O 0.485(2) 0.670(4) 0.621(3) Uiso 0.015(9) 4 1 d . . .
  N21 N 0.748(5) 0.970(4) 0.675(5) Uiso 0.005(9) 4 1 d . . .
  H1n2 H 0.70531 0.354893 0.958671 Uiso 0.0112 4 1 d . . .
  H2n2 H 0.803219 0.488047 0.911187 Uiso 0.0112 4 1 d . . .
  H3n2 H 0.766124 0.496051 1.056524 Uiso 0.0112 4 1 d . . .
  H1n1 H 0.531012 1.099551 0.875008 Uiso 0.0112 4 1 d . . .
  H2n1 H 0.45342 0.940386 0.811238 Uiso 0.0112 4 1 d . . .
  H3n1 H 0.447479 0.980171 0.960785 Uiso 0.0112 4 1 d . . .


#=======================================================================

# 10. MOLECULAR GEOMETRY


loop_
 _geom_bond_atom_site_label_1
 _geom_bond_atom_site_label_2
 _geom_bond_site_symmetry_1
 _geom_bond_site_symmetry_2
 _geom_bond_distance
 _geom_bond_publ_flag
  Ni1 O22 . . 2.12(2) ?
  Ni1 O11 . . 2.16(3) ?
  Ni1 N2 . . 2.00(2) ?
  Ni1 N1 . . 2.10(2) ?
  Ni1 O21 . . 2.14(3) ?
  O22 N21 . . 1.25(4) ?
  N11 O11 . . 1.23(6) ?
  N11 O12 . 2_664 1.31(6) ?
  N11 O13 . . 1.16(6) ?
  N2 H1n2 . . 0.87 ?
  N2 H2n2 . . 0.87 ?
  N2 H3n2 . . 0.87 ?
  O23 N21 . . 1.23(4) ?
  N1 H1n1 . . 0.87 ?
  N1 H2n1 . . 0.87 ?
  N1 H3n1 . . 0.87 ?
  O21 N21 . 4_655 1.32(6) ?

loop_
 _geom_angle_atom_site_label_1
 _geom_angle_atom_site_label_2
 _geom_angle_atom_site_label_3
 _geom_angle_site_symmetry_1
 _geom_angle_site_symmetry_2
 _geom_angle_site_symmetry_3
 _geom_angle
 _geom_angle_publ_flag
  O22 Ni1 O11 . . . 89.4(10) ?
  O22 Ni1 N2 . . . 89.5(12) ?
  O22 Ni1 N1 . . . 95.4(11) ?
  O22 Ni1 O21 . . . 93.2(9) ?
  O11 Ni1 N2 . . . 87.7(10) ?
  O11 Ni1 N1 . . . 91.5(10) ?
  O11 Ni1 O21 . . . 177.0(11) ?
  N2 Ni1 N1 . . . 175.0(14) ?
  N2 Ni1 O21 . . . 93.9(10) ?
  N1 Ni1 O21 . . . 86.8(10) ?
  Ni1 O22 N21 . . . 127(2) ?
  O11 N11 O12 . . 2_664 111(4) ?
  O11 N11 O13 . . . 127(5) ?
  O12 N11 O13 2_664 . . 118(4) ?
  Ni1 O11 N11 . . . 123(3) ?
  Ni1 N2 H1n2 . . . 109.47 ?
  Ni1 N2 H2n2 . . . 109.47 ?
  Ni1 N2 H3n2 . . . 109.47 ?
  H1n2 N2 H2n2 . . . 109.47 ?
  H1n2 N2 H3n2 . . . 109.47 ?
  H2n2 N2 H3n2 . . . 109.47 ?
  Ni1 N1 H1n1 . . . 109.47 ?
  Ni1 N1 H2n1 . . . 109.47 ?
  Ni1 N1 H3n1 . . . 109.47 ?
  H1n1 N1 H2n1 . . . 109.47 ?
  H1n1 N1 H3n1 . . . 109.47 ?
  H2n1 N1 H3n1 . . . 109.47 ?
  Ni1 O21 N21 . . 4_655 127(2) ?
  O22 N21 O23 . . . 121(4) ?
  O22 N21 O21 . . 4_654 116(3) ?
  O23 N21 O21 . . 4_654 119(3) ?

loop_
 _geom_hbond_atom_site_label_D
 _geom_hbond_atom_site_label_H
 _geom_hbond_atom_site_label_A
 _geom_hbond_site_symmetry_D
 _geom_hbond_site_symmetry_H
 _geom_hbond_site_symmetry_A
 _geom_hbond_distance_DH
 _geom_hbond_distance_HA
 _geom_hbond_distance_DA
 _geom_hbond_angle_DHA
 _geom_hbond_publ_flag
  N2 H1n2 O23 . . 1_545   0.87   2.48   3.03(4)   121.80 ?
  N2 H1n2 O21 . . 1_545   0.87   2.45   3.16(3)   139.58 ?
  N2 H2n2 O11 . . 3_565   0.87   2.55   3.39(4)   163.14 ?
  N2 H3n2 O22 . . 4_655   0.87   2.39   3.08(4)   136.89 ?
  N1 H1n1 O11 . . 1_565   0.87   2.40   3.18(3)   148.79 ?
  N1 H1n1 O23 . . .   0.87   2.44   3.00(4)   122.63 ?
  N1 H2n1 O13 . . .   0.87   2.44   3.09(4)   132.05 ?
  N1 H3n1 O21 . . 3_475   0.87   2.57   3.32(4)   144.23 ?


#=======================================================================

# 11. POWDER PROFILE

loop_
 _pd_proc_point_id
 _pd_proc_2theta_corrected
 _pd_proc_intensity_net
 _pd_calc_intensity_net
 _pd_proc_ls_weight
         1         4.9760        1979.00        1942.53          44.49
         2         5.0010        1913.00        1934.34          43.74
         3         5.0260        1967.00        1926.23          44.35
         4         5.0510        1925.00        1918.20          43.87
         5         5.0760        1922.00        1910.25          43.84
         6         5.1010        1924.00        1902.37          43.86
         7         5.1260        1911.00        1894.57          43.72
         8         5.1510        1855.00        1886.84          43.07
         9         5.1760        1809.00        1879.18          42.53
        10         5.2010        1907.00        1871.59          43.67
        11         5.2260        1817.00        1864.08          42.63
        12         5.2510        1835.00        1856.63          42.84
        13         5.2760        1843.00        1849.25          42.93
        14         5.3010        1811.00        1841.94          42.56
        15         5.3260        1841.00        1834.70          42.91
        16         5.3510        1781.00        1827.52          42.20
        17         5.3760        1850.00        1820.41          43.01
        18         5.4010        1835.00        1813.36          42.84
        19         5.4260        1801.00        1806.38          42.44
        20         5.4510        1756.00        1799.45          41.90
        21         5.4760        1860.00        1792.59          43.13
        22         5.5010        1804.00        1785.79          42.47
        23         5.5260        1818.00        1779.05          42.64
        24         5.5510        1776.00        1772.36          42.14
        25         5.5760        1749.00        1765.74          41.82
        26         5.6010        1763.00        1759.17          41.99
        27         5.6260        1741.00        1752.65          41.73
        28         5.6510        1679.00        1746.20          40.98
        29         5.6760        1742.00        1739.80          41.74
        30         5.7010        1700.00        1733.45          41.23
        31         5.7260        1751.00        1727.15          41.85
        32         5.7510        1721.00        1720.91          41.48
        33         5.7760        1687.00        1714.72          41.07
        34         5.8010        1700.00        1708.58          41.23
        35         5.8260        1657.00        1702.49          40.71
        36         5.8510        1654.00        1696.46          40.67
        37         5.8760        1721.00        1690.47          41.48
        38         5.9010        1728.00        1684.53          41.57
        39         5.9260        1707.00        1678.63          41.32
        40         5.9510        1666.00        1672.79          40.82
        41         5.9760        1683.00        1666.99          41.02
        42         6.0010        1654.00        1661.23          40.67
        43         6.0260        1656.00        1655.53          40.69
        44         6.0510        1626.00        1649.86          40.32
        45         6.0760        1658.00        1644.24          40.72
        46         6.1010        1648.00        1638.67          40.60
        47         6.1260        1599.00        1633.14          39.99
        48         6.1510        1627.00        1627.65          40.34
        49         6.1760        1628.00        1622.20          40.35
        50         6.2010        1607.00        1616.79          40.09
        51         6.2260        1586.00        1611.43          39.82
        52         6.2510        1598.00        1606.10          39.97
        53         6.2760        1631.00        1600.82          40.39
        54         6.3010        1646.00        1595.57          40.57
        55         6.3260        1635.00        1590.36          40.44
        56         6.3510        1594.00        1585.19          39.92
        57         6.3760        1574.00        1580.06          39.67
        58         6.4010        1543.00        1574.97          39.28
        59         6.4260        1552.00        1569.91          39.40
        60         6.4510        1568.00        1564.89          39.60
        61         6.4760        1581.00        1559.91          39.76
        62         6.5010        1554.00        1554.96          39.42
        63         6.5260        1572.00        1550.05          39.65
        64         6.5510        1566.00        1545.17          39.57
        65         6.5760        1544.00        1540.32          39.29
        66         6.6010        1556.00        1535.51          39.45
        67         6.6260        1510.00        1530.74          38.86
        68         6.6510        1496.00        1526.00          38.68
        69         6.6760        1530.00        1521.29          39.12
        70         6.7010        1513.00        1516.61          38.90
        71         6.7260        1509.00        1511.96          38.85
        72         6.7510        1541.00        1507.35          39.26
        73         6.7760        1508.00        1502.77          38.83
        74         6.8010        1507.00        1498.21          38.82
        75         6.8260        1507.00        1493.69          38.82
        76         6.8510        1488.00        1489.20          38.57
        77         6.8760        1486.00        1484.74          38.55
        78         6.9010        1484.00        1480.31          38.52
        79         6.9260        1466.00        1475.91          38.29
        80         6.9510        1458.00        1471.54          38.18
        81         6.9760        1460.00        1467.20          38.21
        82         7.0010        1439.00        1462.89          37.93
        83         7.0260        1493.00        1458.60          38.64
        84         7.0510        1556.00        1454.34          39.45
        85         7.0760        1505.00        1450.11          38.79
        86         7.1010        1413.00        1445.91          37.59
        87         7.1260        1397.00        1441.73          37.38
        88         7.1510        1405.00        1437.59          37.48
        89         7.1760        1406.00        1433.46          37.50
        90         7.2010        1498.00        1429.37          38.70
        91         7.2260        1483.00        1425.30          38.51
        92         7.2510        1422.00        1421.26          37.71
        93         7.2760        1409.00        1417.24          37.54
        94         7.3010        1399.00        1413.25          37.40
        95         7.3260        1386.00        1409.28          37.23
        96         7.3510        1439.00        1405.34          37.93
        97         7.3760        1394.00        1401.42          37.34
        98         7.4010        1356.00        1397.53          36.82
        99         7.4260        1373.00        1393.66          37.05
       100         7.4510        1374.00        1389.82          37.07
       101         7.4760        1325.00        1386.00          36.40
       102         7.5010        1392.00        1382.20          37.31
       103         7.5260        1403.00        1378.43          37.46
       104         7.5510        1375.00        1374.68          37.08
       105         7.5760        1370.00        1370.96          37.01
       106         7.6010        1394.00        1367.26          37.34
       107         7.6260        1404.00        1363.58          37.47
       108         7.6510        1392.00        1359.92          37.31
       109         7.6760        1372.00        1356.29          37.04
       110         7.7010        1296.00        1352.68          36.00
       111         7.7260        1343.00        1349.09          36.65
       112         7.7510        1343.00        1345.52          36.65
       113         7.7760        1310.00        1341.98          36.19
       114         7.8010        1326.00        1338.45          36.41
       115         7.8260        1361.00        1334.95          36.89
       116         7.8510        1340.00        1331.48          36.61
       117         7.8760        1355.00        1328.02          36.81
       118         7.9010        1367.00        1324.58          36.97
       119         7.9260        1355.00        1321.17          36.81
       120         7.9510        1313.00        1317.77          36.24
       121         7.9760        1277.00        1314.40          35.74
       122         8.0010        1308.00        1311.05          36.17
       123         8.0260        1342.00        1307.72          36.63
       124         8.0510        1296.00        1304.41          36.00
       125         8.0760        1264.00        1301.12          35.55
       126         8.1010        1290.00        1297.85          35.92
       127         8.1260        1275.00        1294.60          35.71
       128         8.1510        1294.00        1291.37          35.97
       129         8.1760        1295.00        1288.16          35.99
       130         8.2010        1301.00        1284.97          36.07
       131         8.2260        1277.00        1281.81          35.74
       132         8.2510        1255.00        1278.66          35.43
       133         8.2760        1243.00        1275.53          35.26
       134         8.3010        1243.00        1272.42          35.26
       135         8.3260        1236.00        1269.33          35.16
       136         8.3510        1241.00        1266.26          35.23
       137         8.3760        1275.00        1263.21          35.71
       138         8.4010        1208.00        1260.18          34.76
       139         8.4260        1216.00        1257.17          34.87
       140         8.4510        1246.00        1254.18          35.30
       141         8.4760        1287.00        1251.21          35.87
       142         8.5010        1263.00        1248.25          35.54
       143         8.5260        1259.00        1245.32          35.48
       144         8.5510        1218.00        1242.40          34.90
       145         8.5760        1296.00        1239.51          36.00
       146         8.6010        1170.00        1236.63          34.21
       147         8.6260        1252.00        1233.77          35.38
       148         8.6510        1211.00        1230.93          34.80
       149         8.6760        1261.00        1228.11          35.51
       150         8.7010        1217.00        1225.31          34.89
       151         8.7260        1213.00        1222.53          34.83
       152         8.7510        1214.00        1219.76          34.84
       153         8.7760        1250.00        1217.01          35.36
       154         8.8010        1241.00        1214.29          35.23
       155         8.8260        1193.00        1211.58          34.54
       156         8.8510        1230.00        1208.89          35.07
       157         8.8760        1215.00        1206.22          34.86
       158         8.9010        1222.00        1203.56          34.96
       159         8.9260        1215.00        1200.93          34.86
       160         8.9510        1194.00        1198.31          34.55
       161         8.9760        1180.00        1195.71          34.35
       162         9.0010        1193.00        1193.13          34.54
       163         9.0260        1204.00        1190.57          34.70
       164         9.0510        1177.00        1188.03          34.31
       165         9.0760        1233.00        1185.50          35.11
       166         9.1010        1220.00        1182.99          34.93
       167         9.1260        1217.00        1180.50          34.89
       168         9.1510        1172.00        1178.03          34.23
       169         9.1760        1173.00        1175.58          34.25
       170         9.2010        1192.00        1173.14          34.53
       171         9.2260        1149.00        1170.73          33.90
       172         9.2510        1167.00        1168.33          34.16
       173         9.2760        1157.00        1165.95          34.01
       174         9.3010        1135.00        1163.58          33.69
       175         9.3260        1147.00        1161.24          33.87
       176         9.3510        1173.00        1158.91          34.25
       177         9.3760        1191.00        1156.60          34.51
       178         9.4010        1185.00        1154.31          34.42
       179         9.4260        1172.00        1152.04          34.23
       180         9.4510        1191.00        1149.78          34.51
       181         9.4760        1145.00        1147.54          33.84
       182         9.5010        1132.00        1145.32          33.65
       183         9.5260        1108.00        1143.12          33.29
       184         9.5510        1100.00        1140.94          33.17
       185         9.5760        1116.00        1138.77          33.41
       186         9.6010        1125.00        1136.62          33.54
       187         9.6260        1098.00        1134.49          33.14
       188         9.6510        1131.00        1132.38          33.63
       189         9.6760        1154.00        1130.29          33.97
       190         9.7010        1172.00        1128.21          34.23
       191         9.7260        1150.00        1126.15          33.91
       192         9.7510        1098.00        1124.11          33.14
       193         9.7760        1143.00        1122.08          33.81
       194         9.8010        1139.00        1120.08          33.75
       195         9.8260        1115.00        1118.09          33.39
       196         9.8510        1095.00        1116.12          33.09
       197         9.8760        1123.00        1114.17          33.51
       198         9.9010        1116.00        1112.23          33.41
       199         9.9260        1132.00        1110.31          33.65
       200         9.9510        1133.00        1108.42          33.66
       201         9.9760        1110.00        1106.53          33.32
       202        10.0010        1087.00        1104.67          32.97
       203        10.0260        1173.00        1102.82          34.25
       204        10.0510        1168.00        1100.99          34.18
       205        10.0760        1133.00        1099.18          33.66
       206        10.1010        1119.00        1097.39          33.45
       207        10.1260        1102.00        1095.61          33.20
       208        10.1510        1089.00        1093.86          33.00
       209        10.1760        1093.00        1092.12          33.06
       210        10.2010        1116.00        1090.39          33.41
       211        10.2260        1144.00        1088.69          33.82
       212        10.2510        1130.00        1087.00          33.62
       213        10.2760        1074.00        1085.33          32.77
       214        10.3010        1061.00        1083.68          32.57
       215        10.3260        1130.00        1082.05          33.62
       216        10.3510        1106.00        1080.43          33.26
       217        10.3760        1066.00        1078.83          32.65
       218        10.4010        1081.00        1077.25          32.88
       219        10.4260        1072.00        1075.69          32.74
       220        10.4510        1070.00        1074.14          32.71
       221        10.4760        1075.00        1072.61          32.79
       222        10.5010        1040.00        1071.10          32.25
       223        10.5260        1036.00        1069.61          32.19
       224        10.5510        1074.00        1068.13          32.77
       225        10.5760        1076.00        1066.67          32.80
       226        10.6010        1088.00        1065.23          32.98
       227        10.6260        1108.00        1063.81          33.29
       228        10.6510        1086.00        1062.41          32.95
       229        10.6760        1037.00        1061.02          32.20
       230        10.7010        1046.00        1059.65          32.34
       231        10.7260        1059.00        1058.30          32.54
       232        10.7510        1039.00        1056.96          32.23
       233        10.7760        1046.00        1055.64          32.34
       234        10.8010        1079.00        1054.34          32.85
       235        10.8260        1067.00        1053.06          32.67
       236        10.8510        1067.00        1051.80          32.67
       237        10.8760        1089.00        1050.55          33.00
       238        10.9010        1045.00        1049.32          32.33
       239        10.9260        1027.00        1048.11          32.05
       240        10.9510        1059.00        1046.91          32.54
       241        10.9760        1049.00        1045.74          32.39
       242        11.0010        1051.00        1044.58          32.42
       243        11.0260        1085.00        1043.44          32.94
       244        11.0510        1028.00        1042.31          32.06
       245        11.0760        1006.00        1041.20          31.72
       246        11.1010        1014.00        1040.11          31.84
       247        11.1260        1038.00        1039.04          32.22
       248        11.1510        1043.00        1037.99          32.30
       249        11.1760        1058.00        1036.95          32.53
       250        11.2010        1086.00        1035.93          32.95
       251        11.2260        1030.00        1034.93          32.09
       252        11.2510        1026.00        1033.94          32.03
       253        11.2760        1051.00        1032.97          32.42
       254        11.3010        1070.00        1032.02          32.71
       255        11.3260        1068.00        1031.09          32.68
       256        11.3510        1011.00        1030.18          31.80
       257        11.3760        1063.00        1029.28          32.60
       258        11.4010        1076.00        1028.40          32.80
       259        11.4260        1036.00        1027.53          32.19
       260        11.4510        1035.00        1026.68          32.17
       261        11.4760        1029.00        1025.85          32.08
       262        11.5010        1065.00        1025.04          32.63
       263        11.5260        1011.00        1024.25          31.80
       264        11.5510        1030.00        1023.47          32.09
       265        11.5760        1022.00        1022.71          31.97
       266        11.6010        1007.00        1021.96          31.73
       267        11.6260         985.00        1021.24          31.38
       268        11.6510        1015.00        1020.53          31.86
       269        11.6760        1016.00        1019.84          31.87
       270        11.7010        1065.00        1019.16          32.63
       271        11.7260        1062.00        1018.50          32.59
       272        11.7510        1013.00        1017.86          31.83
       273        11.7760         989.00        1017.23          31.45
       274        11.8010        1021.00        1016.63          31.95
       275        11.8260         993.00        1016.04          31.51
       276        11.8510        1024.00        1015.46          32.00
       277        11.8760        1021.00        1014.91          31.95
       278        11.9010        1043.00        1014.37          32.30
       279        11.9260        1032.00        1013.84          32.12
       280        11.9510         974.00        1013.34          31.21
       281        11.9760        1030.00        1012.85          32.09
       282        12.0010        1022.00        1012.37          31.97
       283        12.0260        1001.00        1011.92          31.64
       284        12.0510        1010.00        1011.48          31.78
       285        12.0760         959.00        1011.05          30.97
       286        12.1010         985.00        1010.65          31.38
       287        12.1260        1014.00        1010.26          31.84
       288        12.1510        1034.00        1009.88          32.16
       289        12.1760         987.00        1009.53          31.42
       290        12.2010        1002.00        1009.18          31.65
       291        12.2260        1003.00        1008.86          31.67
       292        12.2510        1007.00        1008.55          31.73
       293        12.2760         984.00        1008.26          31.37
       294        12.3010         992.00        1007.99          31.50
       295        12.3260         996.00        1007.73          31.56
       296        12.3510        1006.00        1007.49          31.72
       297        12.3760         972.00        1007.26          31.18
       298        12.4010        1030.00        1007.05          32.09
       299        12.4260         997.00        1006.85          31.58
       300        12.4510         987.00        1006.68          31.42
       301        12.4760         978.00        1006.52          31.27
       302        12.5010         995.00        1006.37          31.54
       303        12.5260        1002.00        1006.24          31.65
       304        12.5510         956.00        1006.13          30.92
       305        12.5760         977.00        1006.03          31.26
       306        12.6010        1013.00        1005.95          31.83
       307        12.6260         975.00        1005.88          31.23
       308        12.6510        1018.00        1005.83          31.91
       309        12.6760        1023.00        1005.79          31.98
       310        12.7010         953.00        1005.77          30.87
       311        12.7260        1015.00        1005.77          31.86
       312        12.7510        1002.00        1005.78          31.65
       313        12.7760        1021.00        1005.81          31.95
       314        12.8010         990.00        1005.85          31.46
       315        12.8260        1058.00        1005.91          32.53
       316        12.8510         974.00        1005.98          31.21
       317        12.8760         945.00        1006.07          30.74
       318        12.9010        1014.00        1006.18          31.84
       319        12.9260         989.00        1006.30          31.45
       320        12.9510         991.00        1006.43          31.48
       321        12.9760         970.00        1006.58          31.14
       322        13.0010         967.00        1006.75          31.10
       323        13.0260         990.00        1006.93          31.46
       324        13.0510        1013.00        1007.12          31.83
       325        13.0760         980.00        1007.33          31.31
       326        13.1010         971.00        1007.56          31.16
       327        13.1260         983.00        1007.80          31.35
       328        13.1510         930.00        1008.05          30.50
       329        13.1760         960.00        1008.32          30.98
       330        13.2010        1002.00        1008.60          31.65
       331        13.2260        1032.00        1008.90          32.12
       332        13.2510         988.00        1009.21          31.43
       333        13.2760         986.00        1009.54          31.40
       334        13.3010         929.00        1009.88          30.48
       335        13.3260         925.00        1010.24          30.41
       336        13.3510         950.00        1010.61          30.82
       337        13.3760        1012.00        1011.00          31.81
       338        13.4010         995.00        1011.39          31.54
       339        13.4260         988.00        1011.81          31.43
       340        13.4510        1002.00        1012.23          31.65
       341        13.4760         985.00        1012.68          31.38
       342        13.5010        1032.00        1013.13          32.12
       343        13.5260         978.00        1013.60          31.27
       344        13.5510         932.00        1014.08          30.53
       345        13.5760         989.00        1014.58          31.45
       346        13.6010         968.00        1015.09          31.11
       347        13.6260         993.00        1015.61          31.51
       348        13.6510        1020.00        1016.15          31.94
       349        13.6760         985.00        1016.70          31.38
       350        13.7010        1018.00        1017.26          31.91
       351        13.7260         999.00        1017.84          31.61
       352        13.7510         982.00        1018.43          31.34
       353        13.7760         957.00        1019.04          30.94
       354        13.8010         978.00        1019.65          31.27
       355        13.8260         997.00        1020.29          31.58
       356        13.8510         980.00        1020.93          31.31
       357        13.8760         974.00        1021.59          31.21
       358        13.9010        1029.00        1022.25          32.08
       359        13.9260         997.00        1025.31          31.58
       360        13.9510         986.00        1026.20          31.40
       361        13.9760         989.00        1027.12          31.45
       362        14.0010         977.00        1028.08          31.26
       363        14.0260         962.00        1029.09          31.02
       364        14.0510        1002.00        1030.15          31.65
       365        14.0760        1044.00        1031.27          32.31
       366        14.1010        1020.00        1032.46          31.94
       367        14.1260        1019.00        1033.74          31.92
       368        14.1510        1009.00        1035.11          31.76
       369        14.1760         981.00        1036.61          31.32
       370        14.2010         970.00        1038.26          31.14
       371        14.2260         990.00        1040.11          31.46
       372        14.2510         999.00        1042.21          31.61
       373        14.2760        1033.00        1044.66          32.14
       374        14.3010        1052.00        1047.57          32.43
       375        14.3260        1010.00        1051.14          31.78
       376        14.3510        1011.00        1055.70          31.80
       377        14.3760        1072.00        1061.81          32.74
       378        14.4010        1115.00        1070.72          33.39
       379        14.4260        1107.00        1086.31          33.27
       380        14.4510        1135.00        1120.22          33.69
       381        14.4760        1151.00        1195.12          33.93
       382        14.5010        1194.00        1327.11          34.55
       383        14.5260        1363.00        1502.68          36.92
       384        14.5510        1591.00        1659.51          39.89
       385        14.5760        1832.00        1773.59          42.80
       386        14.6010        2091.00        1930.26          45.73
       387        14.6260        2122.00        1965.14          46.07
       388        14.6510        1768.00        1708.93          42.05
       389        14.6760        1449.00        1374.71          38.07
       390        14.7010        1256.00        1192.39          35.44
       391        14.7260        1141.00        1124.73          33.78
       392        14.7510        1106.00        1099.88          33.26
       393        14.7760        1119.00        1087.73          33.45
       394        14.8010        1127.00        1080.54          33.57
       395        14.8260        1114.00        1076.04          33.38
       396        14.8510        1090.00        1073.17          33.02
       397        14.8760        1075.00        1071.37          32.79
       398        14.9010        1085.00        1070.28          32.94
       399        14.9260        1096.00        1069.70          33.11
       400        14.9510        1101.00        1069.49          33.18
       401        14.9760        1083.00        1069.55          32.91
       402        15.0010        1081.00        1069.82          32.88
       403        15.0260        1069.00        1070.25          32.70
       404        15.0510        1052.00        1070.82          32.43
       405        15.0760        1090.00        1071.48          33.02
       406        15.1010        1091.00        1072.24          33.03
       407        15.1260        1093.00        1073.06          33.06
       408        15.1510        1075.00        1073.95          32.79
       409        15.1760        1041.00        1074.88          32.26
       410        15.2010        1111.00        1075.87          33.33
       411        15.2260        1131.00        1076.88          33.63
       412        15.2510        1056.00        1075.49          32.50
       413        15.2760        1062.00        1076.78          32.59
       414        15.3010        1097.00        1078.05          33.12
       415        15.3260        1083.00        1079.33          32.91
       416        15.3510        1079.00        1080.62          32.85
       417        15.3760        1081.00        1081.92          32.88
       418        15.4010        1085.00        1083.23          32.94
       419        15.4260        1047.00        1084.54          32.36
       420        15.4510        1054.00        1085.87          32.47
       421        15.4760        1074.00        1087.20          32.77
       422        15.5010        1103.00        1088.54          33.21
       423        15.5260        1104.00        1089.89          33.23
       424        15.5510        1087.00        1091.25          32.97
       425        15.5760        1096.00        1092.62          33.11
       426        15.6010        1088.00        1094.00          32.98
       427        15.6260        1094.00        1095.39          33.08
       428        15.6510        1097.00        1096.79          33.12
       429        15.6760        1118.00        1098.21          33.44
       430        15.7010        1108.00        1099.64          33.29
       431        15.7260        1101.00        1101.09          33.18
       432        15.7510        1082.00        1102.56          32.89
       433        15.7760        1128.00        1104.08          33.59
       434        15.8010        1149.00        1105.68          33.90
       435        15.8260        1140.00        1107.51          33.76
       436        15.8510        1086.00        1109.85          32.95
       437        15.8760        1176.00        1113.02          34.29
       438        15.9010        1157.00        1116.88          34.01
       439        15.9260        1210.00        1120.77          34.79
       440        15.9510        1137.00        1195.48          33.72
       441        15.9760        1172.00        1204.15          34.23
       442        16.0010        1198.00        1211.14          34.61
       443        16.0260        1141.00        1215.37          33.78
       444        16.0510        1194.00        1220.41          34.55
       445        16.0760        1223.00        1228.41          34.97
       446        16.1010        1208.00        1238.92          34.76
       447        16.1260        1182.00        1251.34          34.38
       448        16.1510        1233.00        1265.65          35.11
       449        16.1760        1252.00        1282.12          35.38
       450        16.2010        1277.00        1301.22          35.74
       451        16.2260        1234.00        1323.57          35.13
       452        16.2510        1297.00        1349.99          36.01
       453        16.2760        1363.00        1381.63          36.92
       454        16.3010        1421.00        1420.05          37.70
       455        16.3260        1556.00        1467.45          39.45
       456        16.3510        1583.00        1527.02          39.79
       457        16.3760        1683.00        1603.56          41.02
       458        16.4010        1960.00        1704.49          44.27
       459        16.4260        2229.00        1841.95          47.21
       460        16.4510        2640.00        2038.05          51.38
       461        16.4760        3183.00        2345.71          56.42
       462        16.5010        4053.00        2930.74          63.66
       463        16.5260        5510.00        4259.37          74.23
       464        16.5510        7565.00        7204.72          86.98
       465        16.5760       10882.00       12373.40         104.32
       466        16.6010       16119.00       19065.00         126.96
       467        16.6260       23868.00       25137.10         154.49
       468        16.6510       31413.00       30375.10         177.24
       469        16.6760       33060.00       33015.10         181.82
       470        16.7010       26587.00       27205.60         163.05
       471        16.7260       16339.00       15907.40         127.82
       472        16.7510        8784.00        7905.27          93.72
       473        16.7760        4947.00        4352.33          70.33
       474        16.8010        3350.00        3043.52          57.88
       475        16.8260        2605.00        2475.69          51.04
       476        16.8510        2256.00        2149.48          47.50
       477        16.8760        2043.00        1934.41          45.20
       478        16.9010        1886.00        1784.21          43.43
       479        16.9260        1786.00        1675.28          42.26
       480        16.9510        1600.00        1593.93          40.00
       481        16.9760        1546.00        1531.68          39.32
       482        17.0010        1558.00        1483.08          39.47
       483        17.0260        1497.00        1444.51          38.69
       484        17.0510        1434.00        1413.45          37.87
       485        17.0760        1387.00        1388.14          37.24
       486        17.1010        1362.00        1367.31          36.91
       487        17.1260        1363.00        1350.03          36.92
       488        17.1510        1336.00        1335.57          36.55
       489        17.1760        1355.00        1323.41          36.81
       490        17.2010        1433.00        1313.12          37.85
       491        17.2260        1301.00        1304.40          36.07
       492        17.2510        1321.00        1296.96          36.35
       493        17.2760        1343.00        1290.62          36.65
       494        17.3010        1292.00        1285.19          35.94
       495        17.3260        1271.00        1280.56          35.65
       496        17.3510        1330.00        1202.90          36.47
       497        17.3760        1391.00        1204.57          37.30
       498        17.4010        1377.00        1206.25          37.11
       499        17.4260        1336.00        1207.93          36.55
       500        17.4510        1340.00        1209.61          36.61
       501        17.4760        1288.00        1211.29          35.89
       502        17.5010        1258.00        1212.97          35.47
       503        17.5260        1284.00        1214.65          35.83
       504        17.5510        1304.00        1216.33          36.11
       505        17.5760        1301.00        1218.01          36.07
       506        17.6010        1302.00        1219.70          36.08
       507        17.6260        1296.00        1221.38          36.00
       508        17.6510        1272.00        1223.07          35.67
       509        17.6760        1307.00        1224.75          36.15
       510        17.7010        1307.00        1226.44          36.15
       511        17.7260        1312.00        1228.12          36.22
       512        17.7510        1320.00        1229.81          36.33
       513        17.7760        1342.00        1231.50          36.63
       514        17.8010        1373.00        1233.18          37.05
       515        17.8260        1370.00        1234.87          37.01
       516        17.8510        1328.00        1357.76          36.44
       517        17.8760        1308.00        1368.17          36.17
       518        17.9010        1304.00        1379.56          36.11
       519        17.9260        1337.00        1392.07          36.56
       520        17.9510        1370.00        1405.91          37.01
       521        17.9760        1426.00        1421.27          37.76
       522        18.0010        1441.00        1438.44          37.96
       523        18.0260        1445.00        1457.75          38.01
       524        18.0510        1457.00        1479.61          38.17
       525        18.0760        1478.00        1504.54          38.44
       526        18.1010        1471.00        1533.20          38.35
       527        18.1260        1513.00        1566.43          38.90
       528        18.1510        1563.00        1605.33          39.53
       529        18.1760        1549.00        1652.69          39.36
       530        18.2010        1570.00        1707.88          39.62
       531        18.2260        1654.00        1774.82          40.67
       532        18.2510        1714.00        1857.25          41.40
       533        18.2760        1806.00        1960.52          42.50
       534        18.3010        1934.00        2092.56          43.98
       535        18.3260        2178.00        2265.43          46.67
       536        18.3510        2590.00        2498.56          50.89
       537        18.3760        3138.00        2826.73          56.02
       538        18.4010        3956.00        3331.58          62.90
       539        18.4260        5296.00        4330.89          72.77
       540        18.4510        7518.00        6357.31          86.71
       541        18.4760       10996.00       10752.90         104.86
       542        18.5010       17229.00       18956.80         131.26
       543        18.5260       27848.00       31071.30         166.88
       544        18.5510       43776.00       46084.00         209.23
       545        18.5760       61073.00       57174.90         247.13
       546        18.6010       66374.00       59871.90         257.63
       547        18.6260       52378.00       48855.60         228.86
       548        18.6510       29766.00       29159.90         172.53
       549        18.6760       13294.00       14641.70         115.30
       550        18.7010        5952.00        7706.27          77.15
       551        18.7260        3666.00        5058.15          60.55
       552        18.7510        2929.00        3974.16          54.12
       553        18.7760        2633.00        3403.62          51.31
       554        18.8010        2486.00        3067.38          49.86
       555        18.8260        2484.00        2891.75          49.84
       556        18.8510        2511.00        2849.57          50.11
       557        18.8760        2681.00        2915.39          51.78
       558        18.9010        2941.00        3049.45          54.23
       559        18.9260        3299.00        3161.38          57.44
       560        18.9510        3435.00        3211.75          58.61
       561        18.9760        3578.00        3172.78          59.82
       562        19.0010        4004.00        3224.49          63.28
       563        19.0260        4747.00        3633.90          68.90
       564        19.0510        6149.00        4810.09          78.42
       565        19.0760        8405.00        7522.16          91.68
       566        19.1010       12341.00       12696.70         111.09
       567        19.1260       18746.00       20439.00         136.92
       568        19.1510       28212.00       29855.70         167.96
       569        19.1760       36495.00       36658.10         191.04
       570        19.2010       38144.00       37679.70         195.30
       571        19.2260       29813.00       29980.80         172.66
       572        19.2510       17940.00       17899.40         133.94
       573        19.2760        9620.00        9297.36          98.08
       574        19.3010        5413.00        5197.36          73.57
       575        19.3260        3731.00        3485.30          61.08
       576        19.3510        2914.00        2817.96          53.98
       577        19.3760        2439.00        2449.92          49.39
       578        19.4010        2210.00        2208.64          47.01
       579        19.4260        2120.00        2039.10          46.04
       580        19.4510        2005.00        1915.42          44.78
       581        19.4760        1857.00        1822.57          43.09
       582        19.5010        1832.00        1751.21          42.80
       583        19.5260        1786.00        1695.27          42.26
       584        19.5510        1662.00        1650.68          40.77
       585        19.5760        1579.00        1614.65          39.74
       586        19.6010        1598.00        1585.17          39.97
       587        19.6260        1508.00        1560.81          38.83
       588        19.6510        1562.00        1540.48          39.52
       589        19.6760        1593.00        1522.06          39.91
       590        19.7010        1552.00        1507.68          39.40
       591        19.7260        1511.00        1495.45          38.87
       592        19.7510        1417.00        1484.99          37.64
       593        19.7760        1488.00        1476.01          38.57
       594        19.8010        1482.00        1468.27          38.50
       595        19.8260        1466.00        1461.58          38.29
       596        19.8510        1468.00        1455.78          38.31
       597        19.8760        1462.00        1450.75          38.24
       598        19.9010        1431.00        1446.39          37.83
       599        19.9260        1484.00        1368.96          38.52
       600        19.9510        1424.00        1370.39          37.74
       601        19.9760        1481.00        1371.81          38.48
       602        20.0010        1391.00        1373.23          37.30
       603        20.0260        1436.00        1374.64          37.89
       604        20.0510        1373.00        1376.05          37.05
       605        20.0760        1391.00        1377.45          37.30
       606        20.1010        1408.00        1378.84          37.52
       607        20.1260        1422.00        1380.23          37.71
       608        20.1510        1430.00        1381.61          37.82
       609        20.1760        1447.00        1382.99          38.04
       610        20.2010        1356.00        1384.36          36.82
       611        20.2260        1403.00        1385.73          37.46
       612        20.2510        1413.00        1387.09          37.59
       613        20.2760        1341.00        1388.44          36.62
       614        20.3010        1370.00        1389.78          37.01
       615        20.3260        1364.00        1391.13          36.93
       616        20.3510        1350.00        1392.46          36.74
       617        20.3760        1420.00        1393.79          37.68
       618        20.4010        1410.00        1395.11          37.55
       619        20.4260        1448.00        1396.43          38.05
       620        20.4510        1439.00        1397.73          37.93
       621        20.4760        1425.00        1399.04          37.75
       622        20.5010        1395.00        1400.33          37.35
       623        20.5260        1367.00        1401.62          36.97
       624        20.5510        1412.00        1402.91          37.58
       625        20.5760        1395.00        1404.18          37.35
       626        20.6010        1343.00        1405.45          36.65
       627        20.6260        1377.00        1406.72          37.11
       628        20.6510        1416.00        1407.97          37.63
       629        20.6760        1341.00        1409.22          36.62
       630        20.7010        1385.00        1410.46          37.22
       631        20.7260        1397.00        1411.70          37.38
       632        20.7510        1408.00        1412.93          37.52
       633        20.7760        1415.00        1414.15          37.62
       634        20.8010        1450.00        1415.37          38.08
       635        20.8260        1404.00        1416.58          37.47
       636        20.8510        1377.00        1417.78          37.11
       637        20.8760        1426.00        1418.97          37.76
       638        20.9010        1421.00        1420.16          37.70
       639        20.9260        1416.00        1464.45          37.63
       640        20.9510        1430.00        1468.44          37.82
       641        20.9760        1458.00        1472.71          38.18
       642        21.0010        1436.00        1477.30          37.89
       643        21.0260        1430.00        1482.25          37.82
       644        21.0510        1448.00        1487.62          38.05
       645        21.0760        1424.00        1493.48          37.74
       646        21.1010        1447.00        1499.90          38.04
       647        21.1260        1475.00        1507.00          38.41
       648        21.1510        1451.00        1514.87          38.09
       649        21.1760        1466.00        1523.68          38.29
       650        21.2010        1478.00        1533.60          38.44
       651        21.2260        1528.00        1544.86          39.09
       652        21.2510        1549.00        1557.75          39.36
       653        21.2760        1520.00        1572.64          38.99
       654        21.3010        1538.00        1590.02          39.22
       655        21.3260        1520.00        1610.53          38.99
       656        21.3510        1568.00        1635.02          39.60
       657        21.3760        1659.00        1664.66          40.73
       658        21.4010        1661.00        1701.09          40.76
       659        21.4260        1690.00        1746.65          41.11
       660        21.4510        1745.00        1804.77          41.77
       661        21.4760        1848.00        1880.69          42.99
       662        21.5010        2036.00        1982.89          45.12
       663        21.5260        2300.00        2127.38          47.96
       664        21.5510        2764.00        2354.30          52.57
       665        21.5760        3582.00        2781.76          59.85
       666        21.6010        4873.00        3717.50          69.81
       667        21.6260        6962.00        5761.64          83.44
       668        21.6510       10392.00        9648.40         101.94
       669        21.6760       15525.00       15484.80         124.60
       670        21.7010       21566.00       22019.80         146.85
       671        21.7260       25652.00       26059.50         160.16
       672        21.7510       24594.00       24971.90         156.82
       673        21.7760       18764.00       18453.90         136.98
       674        21.8010       11716.00       10998.10         108.24
       675        21.8260        6408.00        6093.00          80.05
       676        21.8510        3694.00        3749.18          60.78
       677        21.8760        2610.00        2804.60          51.09
       678        21.9010        2159.00        2396.52          46.47
       679        21.9260        1911.00        2171.26          43.72
       680        21.9510        1816.00        2022.63          42.61
       681        21.9760        1769.00        1916.92          42.06
       682        22.0010        1700.00        1838.90          41.23
       683        22.0260        1671.00        1779.77          40.88
       684        22.0510        1680.00        1733.94          40.99
       685        22.0760        1639.00        1697.77          40.48
       686        22.1010        1603.00        1668.76          40.04
       687        22.1260        1570.00        1645.18          39.62
       688        22.1510        1562.00        1625.78          39.52
       689        22.1760        1529.00        1609.66          39.10
       690        22.2010        1554.00        1596.15          39.42
       691        22.2260        1545.00        1584.72          39.31
       692        22.2510        1510.00        1574.99          38.86
       693        22.2760        1538.00        1566.66          39.22
       694        22.3010        1509.00        1559.49          38.85
       695        22.3260        1490.00        1553.28          38.60
       696        22.3510        1541.00        1547.89          39.26
       697        22.3760        1521.00        1543.18          39.00
       698        22.4010        1535.00        1539.06          39.18
       699        22.4260        1543.00        1535.44          39.28
       700        22.4510        1475.00        1532.25          38.41
       701        22.4760        1452.00        1529.44          38.11
       702        22.5010        1542.00        1526.96          39.27
       703        22.5260        1553.00        1481.03          39.41
       704        22.5510        1486.00        1481.70          38.55
       705        22.5760        1442.00        1482.37          37.97
       706        22.6010        1506.00        1483.02          38.81
       707        22.6260        1482.00        1483.67          38.50
       708        22.6510        1469.00        1484.31          38.33
       709        22.6760        1454.00        1484.94          38.13
       710        22.7010        1476.00        1485.56          38.42
       711        22.7260        1535.00        1486.17          39.18
       712        22.7510        1462.00        1486.77          38.24
       713        22.7760        1476.00        1487.37          38.42
       714        22.8010        1494.00        1487.96          38.65
       715        22.8260        1489.00        1488.54          38.59
       716        22.8510        1434.00        1489.11          37.87
       717        22.8760        1450.00        1492.04          38.08
       718        22.9010        1422.00        1492.74          37.71
       719        22.9260        1475.00        1493.44          38.41
       720        22.9510        1466.00        1494.15          38.29
       721        22.9760        1468.00        1494.87          38.31
       722        23.0010        1458.00        1495.59          38.18
       723        23.0260        1459.00        1496.34          38.20
       724        23.0510        1448.00        1497.10          38.05
       725        23.0760        1495.00        1497.88          38.67
       726        23.1010        1516.00        1498.68          38.94
       727        23.1260        1465.00        1499.52          38.28
       728        23.1510        1485.00        1500.88          38.54
       729        23.1760        1549.00        1501.83          39.36
       730        23.2010        1538.00        1502.84          39.22
       731        23.2260        1485.00        1503.93          38.54
       732        23.2510        1458.00        1505.10          38.18
       733        23.2760        1491.00        1506.39          38.61
       734        23.3010        1445.00        1507.81          38.01
       735        23.3260        1489.00        1509.41          38.59
       736        23.3510        1490.00        1511.23          38.60
       737        23.3760        1457.00        1513.34          38.17
       738        23.4010        1513.00        1515.82          38.90
       739        23.4260        1460.00        1518.81          38.21
       740        23.4510        1505.00        1522.48          38.79
       741        23.4760        1439.00        1527.10          37.93
       742        23.5010        1526.00        1533.10          39.06
       743        23.5260        1535.00        1541.30          39.18
       744        23.5510        1579.00        1553.70          39.74
       745        23.5760        1597.00        1576.14          39.96
       746        23.6010        1611.00        1623.11          40.14
       747        23.6260        1720.00        1720.83          41.47
       748        23.6510        1815.00        1902.29          42.60
       749        23.6760        2174.00        2187.55          46.63
       750        23.7010        2502.00        2552.26          50.02
       751        23.7260        2791.00        2933.49          52.83
       752        23.7510        2879.00        3091.55          53.66
       753        23.7760        2636.00        2805.09          51.34
       754        23.8010        2207.00        2319.02          46.98
       755        23.8260        1869.00        1931.42          43.23
       756        23.8510        1667.00        1721.16          40.83
       757        23.8760        1589.00        1638.28          39.86
       758        23.9010        1658.00        1622.03          40.72
       759        23.9260        1629.00        1643.60          40.36
       760        23.9510        1732.00        1693.49          41.62
       761        23.9760        1857.00        1761.30          43.09
       762        24.0010        1911.00        1829.99          43.72
       763        24.0260        2014.00        1842.99          44.88
       764        24.0510        1823.00        1771.09          42.70
       765        24.0760        1673.00        1671.74          40.90
       766        24.1010        1696.00        1597.23          41.18
       767        24.1260        1634.00        1557.16          40.42
       768        24.1510        1566.00        1539.50          39.57
       769        24.1760        1515.00        1531.78          38.92
       770        24.2010        1446.00        1527.67          38.03
       771        24.2260        1527.00        1525.01          39.08
       772        24.2510        1478.00        1523.11          38.44
       773        24.2760        1489.00        1521.71          38.59
       774        24.3010        1510.00        1520.68          38.86
       775        24.3260        1539.00        1519.91          39.23
       776        24.3510        1532.00        1519.37          39.14
       777        24.3760        1470.00        1519.00          38.34
       778        24.4010        1502.00        1518.80          38.76
       779        24.4260        1543.00        1518.75          39.28
       780        24.4510        1508.00        1534.18          38.83
       781        24.4760        1422.00        1535.32          37.71
       782        24.5010        1448.00        1536.72          38.05
       783        24.5260        1446.00        1538.40          38.03
       784        24.5510        1514.00        1540.43          38.91
       785        24.5760        1587.00        1542.89          39.84
       786        24.6010        1558.00        1543.49          39.47
       787        24.6260        1517.00        1547.32          38.95
       788        24.6510        1505.00        1552.13          38.79
       789        24.6760        1502.00        1558.44          38.76
       790        24.7010        1548.00        1567.63          39.34
       791        24.7260        1557.00        1583.52          39.46
       792        24.7510        1630.00        1614.97          40.37
       793        24.7760        1671.00        1677.47          40.88
       794        24.8010        1755.00        1790.30          41.89
       795        24.8260        1853.00        1962.51          43.05
       796        24.8510        2111.00        2171.70          45.95
       797        24.8760        2292.00        2361.47          47.87
       798        24.9010        2393.00        2397.87          48.92
       799        24.9260        2174.00        2220.60          46.63
       800        24.9510        1868.00        1978.06          43.22
       801        24.9760        1681.00        1799.37          41.00
       802        25.0010        1670.00        1710.00          40.87
       803        25.0260        1680.00        1681.81          40.99
       804        25.0510        1688.00        1684.35          41.09
       805        25.0760        1667.00        1702.63          40.83
       806        25.1010        1718.00        1733.43          41.45
       807        25.1260        1771.00        1780.13          42.08
       808        25.1510        1830.00        1855.13          42.78
       809        25.1760        2026.00        1994.81          45.01
       810        25.2010        2393.00        2289.92          48.92
       811        25.2260        2983.00        2913.78          54.62
       812        25.2510        4096.00        4108.05          64.00
       813        25.2760        5906.00        6054.03          76.85
       814        25.3010        8318.00        8567.88          91.20
       815        25.3260       10624.00       11036.40         103.07
       816        25.3510       11342.00       12048.90         106.50
       817        25.3760        9781.00       10332.70          98.90
       818        25.4010        6978.00        7230.59          83.53
       819        25.4260        4500.00        4588.80          67.08
       820        25.4510        3005.00        3023.61          54.82
       821        25.4760        2350.00        2297.62          48.48
       822        25.5010        2037.00        1995.56          45.13
       823        25.5260        1826.00        1856.86          42.73
       824        25.5510        1808.00        1776.92          42.52
       825        25.5760        1711.00        1722.64          41.36
       826        25.6010        1668.00        1683.01          40.84
       827        25.6260        1635.00        1653.02          40.44
       828        25.6510        1571.00        1629.77          39.64
       829        25.6760        1605.00        1611.36          40.06
       830        25.7010        1570.00        1596.52          39.62
       831        25.7260        1526.00        1584.37          39.06
       832        25.7510        1573.00        1573.00          39.66
       833        25.7760        1551.00        1564.59          39.38
       834        25.8010        1516.00        1557.44          38.94
       835        25.8260        1543.00        1551.31          39.28
       836        25.8510        1537.00        1546.00          39.20
       837        25.8760        1510.00        1541.35          38.86
       838        25.9010        1481.00        1537.26          38.48
       839        25.9260        1510.00        1533.62          38.86
       840        25.9510        1521.00        1530.37          39.00
       841        25.9760        1450.00        1527.44          38.08
       842        26.0010        1455.00        1524.79          38.14
       843        26.0260        1444.00        1522.38          38.00
       844        26.0510        1477.00        1520.16          38.43
       845        26.0760        1535.00        1518.12          39.18
       846        26.1010        1461.00        1516.23          38.22
       847        26.1260        1463.00        1514.47          38.25
       848        26.1510        1467.00        1512.83          38.30
       849        26.1760        1474.00        1511.28          38.39
       850        26.2010        1486.00        1509.83          38.55
       851        26.2260        1491.00        1492.84          38.61
       852        26.2510        1488.00        1492.38          38.57
       853        26.2760        1479.00        1491.91          38.46
       854        26.3010        1483.00        1491.44          38.51
       855        26.3260        1494.00        1490.95          38.65
       856        26.3510        1510.00        1490.47          38.86
       857        26.3760        1486.00        1489.97          38.55
       858        26.4010        1452.00        1489.47          38.11
       859        26.4260        1387.00        1488.97          37.24
       860        26.4510        1392.00        1488.46          37.31
       861        26.4760        1440.00        1487.94          37.95
       862        26.5010        1433.00        1487.42          37.85
       863        26.5260        1450.00        1486.89          38.08
       864        26.5510        1468.00        1486.35          38.31
       865        26.5760        1446.00        1485.81          38.03
       866        26.6010        1495.00        1485.27          38.67
       867        26.6260        1456.00        1484.71          38.16
       868        26.6510        1539.00        1484.16          39.23
       869        26.6760        1540.00        1483.59          39.24
       870        26.7010        1498.00        1483.02          38.70
       871        26.7260        1496.00        1482.45          38.68
       872        26.7510        1553.00        1481.87          39.41
       873        26.7760        1522.00        1481.28          39.01
       874        26.8010        1491.00        1480.69          38.61
       875        26.8260        1565.00        1480.10          39.56
       876        26.8510        1554.00        1479.50          39.42
       877        26.8760        1522.00        1478.89          39.01
       878        26.9010        1508.00        1478.28          38.83
       879        26.9260        1465.00        1477.66          38.28
       880        26.9510        1516.00        1477.04          38.94
       881        26.9760        1467.00        1476.41          38.30
       882        27.0010        1452.00        1475.77          38.11
       883        27.0260        1497.00        1475.14          38.69
       884        27.0510        1482.00        1474.49          38.50
       885        27.0760        1503.00        1473.84          38.77
       886        27.1010        1503.00        1473.19          38.77
       887        27.1260        1436.00        1472.53          37.89
       888        27.1510        1448.00        1471.86          38.05
       889        27.1760        1471.00        1471.20          38.35
       890        27.2010        1496.00        1470.52          38.68
       891        27.2260        1440.00        1469.84          37.95
       892        27.2510        1395.00        1469.16          37.35
       893        27.2760        1468.00        1468.47          38.31
       894        27.3010        1482.00        1467.78          38.50
       895        27.3260        1472.00        1467.08          38.37
       896        27.3510        1544.00        1471.30          39.29
       897        27.3760        1417.00        1470.86          37.64
       898        27.4010        1390.00        1470.44          37.28
       899        27.4260        1518.00        1470.04          38.96
       900        27.4510        1403.00        1469.66          37.46
       901        27.4760        1449.00        1469.31          38.07
       902        27.5010        1503.00        1468.99          38.77
       903        27.5260        1415.00        1468.71          37.62
       904        27.5510        1451.00        1468.46          38.09
       905        27.5760        1475.00        1468.27          38.41
       906        27.6010        1517.00        1468.13          38.95
       907        27.6260        1463.00        1468.05          38.25
       908        27.6510        1485.00        1468.05          38.54
       909        27.6760        1487.00        1468.14          38.56
       910        27.7010        1470.00        1468.33          38.34
       911        27.7260        1551.00        1468.64          39.38
       912        27.7510        1525.00        1469.10          39.05
       913        27.7760        1604.00        1469.73          40.05
       914        27.8010        1454.00        1470.57          38.13
       915        27.8260        1476.00        1471.66          38.42
       916        27.8510        1526.00        1473.07          39.06
       917        27.8760        1464.00        1474.87          38.26
       918        27.9010        1523.00        1477.16          39.03
       919        27.9260        1534.00        1480.06          39.17
       920        27.9510        1545.00        1483.77          39.31
       921        27.9760        1595.00        1488.53          39.94
       922        28.0010        1545.00        1494.68          39.31
       923        28.0260        1626.00        1558.56          40.32
       924        28.0510        1639.00        1572.36          40.48
       925        28.0760        1656.00        1590.62          40.69
       926        28.1010        1704.00        1616.94          41.28
       927        28.1260        1753.00        1661.05          41.87
       928        28.1510        1962.00        1747.56          44.29
       929        28.1760        2233.00        1927.83          47.25
       930        28.2010        2462.00        2283.12          49.62
       931        28.2260        2870.00        2893.65          53.57
       932        28.2510        3394.00        3741.84          58.26
       933        28.2760        3969.00        4617.65          63.00
       934        28.3010        4281.00        5140.87          65.43
       935        28.3260        4117.00        4888.72          64.16
       936        28.3510        3700.00        4003.47          60.83
       937        28.3760        3012.00        3049.73          54.88
       938        28.4010        2429.00        2366.43          49.28
       939        28.4260        2070.00        1994.13          45.50
       940        28.4510        1860.00        1830.98          43.13
       941        28.4760        1816.00        1770.25          42.61
       942        28.5010        1751.00        1751.58          41.85
       943        28.5260        1732.00        1751.19          41.62
       944        28.5510        1744.00        1761.70          41.76
       945        28.5760        1731.00        1781.22          41.61
       946        28.6010        1748.00        1809.70          41.81
       947        28.6260        1714.00        1848.08          41.40
       948        28.6510        1730.00        1898.15          41.59
       949        28.6760        1817.00        1962.82          42.63
       950        28.7010        1909.00        2046.46          43.69
       951        28.7260        1964.00        2155.85          44.32
       952        28.7510        2079.00        2302.34          45.60
       953        28.7760        2336.00        2509.50          48.33
       954        28.8010        2693.00        2838.03          51.89
       955        28.8260        3459.00        3450.85          58.81
       956        28.8510        4910.00        4734.21          70.07
       957        28.8760        7595.00        7418.28          87.15
       958        28.9010       12763.00       12517.90         112.97
       959        28.9260       21363.00       20667.00         146.16
       960        28.9510       32273.00       30895.10         179.65
       961        28.9760       41595.00       39975.70         203.95
       962        29.0010       44036.00       43040.10         209.85
       963        29.0260       37918.00       36965.40         194.73
       964        29.0510       26394.00       25881.80         162.46
       965        29.0760       15372.00       15663.90         123.98
       966        29.1010        8309.00        8875.72          91.15
       967        29.1260        4849.00        5302.07          69.63
       968        29.1510        3318.00        3687.32          57.60
       969        29.1760        2598.00        2969.27          50.97
       970        29.2010        2296.00        2598.94          47.92
       971        29.2260        2126.00        2366.02          46.11
       972        29.2510        1966.00        2200.50          44.34
       973        29.2760        1896.00        2071.78          43.54
       974        29.3010        1884.00        1976.62          43.41
       975        29.3260        1843.00        1902.28          42.93
       976        29.3510        1768.00        1843.54          42.05
       977        29.3760        1755.00        1796.93          41.89
       978        29.4010        1782.00        1760.11          42.21
       979        29.4260        1754.00        1731.45          41.88
       980        29.4510        1753.00        1709.69          41.87
       981        29.4760        1759.00        1693.51          41.94
       982        29.5010        1769.00        1681.54          42.06
       983        29.5260        1761.00        1672.59          41.96
       984        29.5510        1723.00        1666.86          41.51
       985        29.5760        1741.00        1665.88          41.73
       986        29.6010        1752.00        1671.25          41.86
       987        29.6260        1762.00        1684.25          41.98
       988        29.6510        1882.00        1707.00          43.38
       989        29.6760        2059.00        1743.89          45.38
       990        29.7010        2231.00        1806.55          47.23
       991        29.7260        2482.00        1926.81          49.82
       992        29.7510        2915.00        2182.69          53.99
       993        29.7760        3550.00        2729.46          59.58
       994        29.8010        4399.00        3797.69          66.32
       995        29.8260        5892.00        5582.21          76.76
       996        29.8510        7679.00        7969.26          87.63
       997        29.8760        9266.00       10303.90          96.26
       998        29.9010        9836.00       11512.80          99.18
       999        29.9260        9228.00       10635.70          96.06
      1000        29.9510        7705.00        8192.17          87.78
      1001        29.9760        5720.00        5542.54          75.63
      1002        30.0010        4097.00        3639.00          64.01
      1003        30.0260        3009.00        2546.67          54.85
      1004        30.0510        2446.00        2022.48          49.46
      1005        30.0760        2144.00        1789.10          46.30
      1006        30.1010        1968.00        1676.16          44.36
      1007        30.1260        1789.00        1609.79          42.30
      1008        30.1510        1747.00        1563.98          41.80
      1009        30.1760        1733.00        1529.77          41.63
      1010        30.2010        1664.00        1503.22          40.79
      1011        30.2260        1600.00        1482.16          40.00
      1012        30.2510        1578.00        1465.12          39.72
      1013        30.2760        1611.00        1451.11          40.14
      1014        30.3010        1614.00        1439.44          40.17
      1015        30.3260        1564.00        1429.59          39.55
      1016        30.3510        1537.00        1421.20          39.20
      1017        30.3760        1513.00        1413.99          38.90
      1018        30.4010        1492.00        1407.81          38.63
      1019        30.4260        1506.00        1402.58          38.81
      1020        30.4510        1413.00        1398.46          37.59
      1021        30.4760        1477.00        1395.98          38.43
      1022        30.5010        1509.00        1396.12          38.85
      1023        30.5260        1560.00        1400.12          39.50
      1024        30.5510        1545.00        1408.35          39.31
      1025        30.5760        1551.00        1418.74          39.38
      1026        30.6010        1525.00        1426.40          39.05
      1027        30.6260        1537.00        1425.16          39.20
      1028        30.6510        1544.00        1412.99          39.29
      1029        30.6760        1568.00        1396.00          39.60
      1030        30.7010        1591.00        1380.81          39.89
      1031        30.7260        1627.00        1370.07          40.34
      1032        30.7510        1547.00        1363.38          39.33
      1033        30.7760        1572.00        1359.22          39.65
      1034        30.8010        1486.00        1356.30          38.55
      1035        30.8260        1493.00        1353.91          38.64
      1036        30.8510        1476.00        1351.78          38.42
      1037        30.8760        1451.00        1349.79          38.09
      1038        30.9010        1422.00        1335.00          37.71
      1039        30.9260        1435.00        1333.82          37.88
      1040        30.9510        1397.00        1332.67          37.38
      1041        30.9760        1373.00        1331.54          37.05
      1042        31.0010        1393.00        1330.42          37.32
      1043        31.0260        1412.00        1329.31          37.58
      1044        31.0510        1297.00        1328.36          36.01
      1045        31.0760        1348.00        1327.28          36.72
      1046        31.1010        1398.00        1326.20          37.39
      1047        31.1260        1362.00        1325.13          36.91
      1048        31.1510        1376.00        1324.06          37.09
      1049        31.1760        1315.00        1322.99          36.26
      1050        31.2010        1351.00        1321.93          36.76
      1051        31.2260        1325.00        1320.88          36.40
      1052        31.2510        1346.00        1319.82          36.69
      1053        31.2760        1318.00        1331.20          36.30
      1054        31.3010        1358.00        1330.76          36.85
      1055        31.3260        1298.00        1330.38          36.03
      1056        31.3510        1304.00        1330.04          36.11
      1057        31.3760        1315.00        1329.77          36.26
      1058        31.4010        1350.00        1329.57          36.74
      1059        31.4260        1377.00        1329.43          37.11
      1060        31.4510        1330.00        1329.38          36.47
      1061        31.4760        1358.00        1329.42          36.85
      1062        31.5010        1294.00        1329.57          35.97
      1063        31.5260        1333.00        1329.83          36.51
      1064        31.5510        1281.00        1330.22          35.79
      1065        31.5760        1282.00        1330.76          35.81
      1066        31.6010        1332.00        1331.47          36.50
      1067        31.6260        1342.00        1332.30          36.63
      1068        31.6510        1371.00        1333.44          37.03
      1069        31.6760        1334.00        1334.83          36.52
      1070        31.7010        1315.00        1336.53          36.26
      1071        31.7260        1401.00        1338.58          37.43
      1072        31.7510        1309.00        1341.06          36.18
      1073        31.7760        1327.00        1344.03          36.43
      1074        31.8010        1369.00        1347.61          37.00
      1075        31.8260        1391.00        1351.92          37.30
      1076        31.8510        1368.00        1360.57          36.99
      1077        31.8760        1388.00        1367.08          37.26
      1078        31.9010        1416.00        1375.11          37.63
      1079        31.9260        1452.00        1385.32          38.11
      1080        31.9510        1373.00        1398.96          37.05
      1081        31.9760        1423.00        1418.28          37.72
      1082        32.0010        1435.00        1446.61          37.88
      1083        32.0260        1516.00        1487.39          38.94
      1084        32.0510        1621.00        1541.79          40.26
      1085        32.0760        1698.00        1606.45          41.21
      1086        32.1010        1767.00        1676.41          42.04
      1087        32.1260        1963.00        1756.92          44.31
      1088        32.1510        2263.00        1892.03          47.57
      1089        32.1760        2605.00        2192.52          51.04
      1090        32.2010        3316.00        2851.10          57.58
      1091        32.2260        4403.00        4073.70          66.36
      1092        32.2510        6026.00        5990.73          77.63
      1093        32.2760        7756.00        8373.51          88.07
      1094        32.3010        9624.00       10496.20          98.10
      1095        32.3260       10559.00       11339.20         102.76
      1096        32.3510        9988.00       10259.70          99.94
      1097        32.3760        7968.00        7905.89          89.26
      1098        32.4010        5664.00        5469.84          75.26
      1099        32.4260        3675.00        3643.56          60.62
      1100        32.4510        2489.00        2549.98          49.89
      1101        32.4760        1917.00        1998.00          43.78
      1102        32.5010        1649.00        1744.71          40.61
      1103        32.5260        1503.00        1625.23          38.77
      1104        32.5510        1479.00        1560.01          38.46
      1105        32.5760        1471.00        1518.53          38.35
      1106        32.6010        1421.00        1490.10          37.70
      1107        32.6260        1408.00        1470.70          37.52
      1108        32.6510        1408.00        1461.36          37.52
      1109        32.6760        1381.00        1455.75          37.16
      1110        32.7010        1396.00        1457.07          37.36
      1111        32.7260        1439.00        1468.13          37.93
      1112        32.7510        1475.00        1497.53          38.41
      1113        32.7760        1489.00        1566.32          38.59
      1114        32.8010        1610.00        1715.67          40.12
      1115        32.8260        1914.00        2005.53          43.75
      1116        32.8510        2429.00        2487.57          49.28
      1117        32.8760        3183.00        3143.75          56.42
      1118        32.9010        3921.00        3821.92          62.62
      1119        32.9260        4378.00        4252.99          66.17
      1120        32.9510        4273.00        4178.43          65.37
      1121        32.9760        3646.00        3626.21          60.38
      1122        33.0010        2846.00        2916.70          53.35
      1123        33.0260        2185.00        2320.88          46.74
      1124        33.0510        1822.00        1940.98          42.68
      1125        33.0760        1726.00        1762.03          41.55
      1126        33.1010        1719.00        1735.57          41.46
      1127        33.1260        1809.00        1850.37          42.53
      1128        33.1510        2178.00        2168.02          46.67
      1129        33.1760        2899.00        2828.67          53.84
      1130        33.2010        4028.00        3948.00          63.47
      1131        33.2260        5630.00        5529.40          75.03
      1132        33.2510        7394.00        7254.86          85.99
      1133        33.2760        8544.00        8487.83          92.43
      1134        33.3010        8509.00        8540.09          92.24
      1135        33.3260        7300.00        7306.10          85.44
      1136        33.3510        5441.00        5501.37          73.76
      1137        33.3760        3793.00        3850.94          61.59
      1138        33.4010        2705.00        2709.92          52.01
      1139        33.4260        2075.00        2058.75          45.55
      1140        33.4510        1828.00        1739.57          42.76
      1141        33.4760        1702.00        1595.03          41.26
      1142        33.5010        1642.00        1528.57          40.52
      1143        33.5260        1557.00        1497.21          39.46
      1144        33.5510        1554.00        1488.50          39.42
      1145        33.5760        1656.00        1507.71          40.69
      1146        33.6010        1782.00        1576.88          42.21
      1147        33.6260        1880.00        1736.55          43.36
      1148        33.6510        2112.00        2035.99          45.96
      1149        33.6760        2531.00        2499.00          50.31
      1150        33.7010        3030.00        3068.03          55.05
      1151        33.7260        3445.00        3572.45          58.69
      1152        33.7510        3664.00        3776.94          60.53
      1153        33.7760        3543.00        3536.72          59.52
      1154        33.8010        3099.00        2988.75          55.67
      1155        33.8260        2498.00        2401.26          49.98
      1156        33.8510        1982.00        1943.88          44.52
      1157        33.8760        1651.00        1659.07          40.63
      1158        33.9010        1495.00        1511.76          38.67
      1159        33.9260        1486.00        1446.66          38.55
      1160        33.9510        1444.00        1422.36          38.00
      1161        33.9760        1419.00        1417.35          37.67
      1162        34.0010        1448.00        1436.46          38.05
      1163        34.0260        1472.00        1449.22          38.37
      1164        34.0510        1578.00        1477.22          39.72
      1165        34.0760        1681.00        1524.99          41.00
      1166        34.1010        1798.00        1614.60          42.40
      1167        34.1260        2123.00        1799.03          46.08
      1168        34.1510        2571.00        2183.57          50.71
      1169        34.1760        3113.00        2929.40          55.79
      1170        34.2010        4274.00        4192.30          65.38
      1171        34.2260        5749.00        5982.32          75.82
      1172        34.2510        7365.00        7977.68          85.82
      1173        34.2760        8412.00        9492.55          91.72
      1174        34.3010        8463.00        9747.62          91.99
      1175        34.3260        7604.00        8516.94          87.20
      1176        34.3510        6031.00        6502.67          77.66
      1177        34.3760        4378.00        4549.86          66.17
      1178        34.4010        3071.00        3120.76          55.42
      1179        34.4260        2381.00        2260.60          48.80
      1180        34.4510        1918.00        1817.28          43.79
      1181        34.4760        1753.00        1608.19          41.87
      1182        34.5010        1597.00        1507.79          39.96
      1183        34.5260        1519.00        1452.91          38.97
      1184        34.5510        1445.00        1418.00          38.01
      1185        34.5760        1424.00        1393.74          37.74
      1186        34.6010        1452.00        1376.50          38.11
      1187        34.6260        1322.00        1364.56          36.36
      1188        34.6510        1358.00        1356.94          36.85
      1189        34.6760        1328.00        1353.07          36.44
      1190        34.7010        1398.00        1352.66          37.39
      1191        34.7260        1323.00        1355.68          36.37
      1192        34.7510        1307.00        1362.32          36.15
      1193        34.7760        1359.00        1373.03          36.86
      1194        34.8010        1356.00        1388.56          36.82
      1195        34.8260        1330.00        1410.16          36.47
      1196        34.8510        1391.00        1437.14          37.30
      1197        34.8760        1444.00        1479.74          38.00
      1198        34.9010        1553.00        1545.90          39.41
      1199        34.9260        1719.00        1663.75          41.46
      1200        34.9510        2067.00        1899.49          45.46
      1201        34.9760        2756.00        2383.92          52.50
      1202        35.0010        3711.00        3316.72          60.92
      1203        35.0260        5381.00        4898.88          73.36
      1204        35.0510        7515.00        7163.01          86.69
      1205        35.0760       10103.00        9743.79         100.51
      1206        35.1010       11842.00       11820.50         108.82
      1207        35.1260       12411.00       12397.80         111.40
      1208        35.1510       11125.00       11071.70         105.47
      1209        35.1760        8650.00        8604.17          93.01
      1210        35.2010        6194.00        6107.06          78.70
      1211        35.2260        4085.00        4237.09          63.91
      1212        35.2510        2949.00        3135.59          54.30
      1213        35.2760        2597.00        2614.46          50.96
      1214        35.3010        2388.00        2383.99          48.87
      1215        35.3260        2162.00        2214.08          46.50
      1216        35.3510        1943.00        2011.32          44.08
      1217        35.3760        1669.00        1796.20          40.85
      1218        35.4010        1462.00        1601.37          38.24
      1219        35.4260        1393.00        1467.82          37.32
      1220        35.4510        1315.00        1382.81          36.26
      1221        35.4760        1261.00        1332.39          35.51
      1222        35.5010        1303.00        1302.38          36.10
      1223        35.5260        1217.00        1283.57          34.89
      1224        35.5510        1266.00        1271.41          35.58
      1225        35.5760        1240.00        1263.89          35.21
      1226        35.6010        1234.00        1259.48          35.13
      1227        35.6260        1226.00        1256.15          35.01
      1228        35.6510        1274.00        1251.44          35.69
      1229        35.6760        1298.00        1243.72          36.03
      1230        35.7010        1273.00        1233.78          35.68
      1231        35.7260        1236.00        1223.88          35.16
      1232        35.7510        1158.00        1215.65          34.03
      1233        35.7760        1181.00        1210.95          34.37
      1234        35.8010        1172.00        1207.08          34.23
      1235        35.8260        1142.00        1204.80          33.79
      1236        35.8510        1126.00        1203.72          33.56
      1237        35.8760        1104.00        1203.66          33.23
      1238        35.9010        1174.00        1204.63          34.26
      1239        35.9260        1158.00        1206.79          34.03
      1240        35.9510        1125.00        1210.53          33.54
      1241        35.9760        1164.00        1216.69          34.12
      1242        36.0010        1152.00        1227.38          33.94
      1243        36.0260        1142.00        1247.77          33.79
      1244        36.0510        1208.00        1289.32          34.76
      1245        36.0760        1254.00        1373.15          35.41
      1246        36.1010        1363.00        1529.84          36.92
      1247        36.1260        1666.00        1789.05          40.82
      1248        36.1510        2085.00        2156.11          45.66
      1249        36.1760        2534.00        2583.46          50.34
      1250        36.2010        2909.00        2959.14          53.94
      1251        36.2260        3130.00        3142.01          55.95
      1252        36.2510        3126.00        3043.81          55.91
      1253        36.2760        2793.00        2733.89          52.85
      1254        36.3010        2316.00        2313.50          48.12
      1255        36.3260        1901.00        1911.47          43.60
      1256        36.3510        1555.00        1604.05          39.43
      1257        36.3760        1372.00        1405.05          37.04
      1258        36.4010        1310.00        1292.18          36.19
      1259        36.4260        1217.00        1233.75          34.89
      1260        36.4510        1177.00        1203.48          34.31
      1261        36.4760        1156.00        1187.61          34.00
      1262        36.5010        1167.00        1177.88          34.16
      1263        36.5260        1177.00        1171.20          34.31
      1264        36.5510        1209.00        1180.22          34.77
      1265        36.5760        1210.00        1177.27          34.79
      1266        36.6010        1175.00        1175.44          34.28
      1267        36.6260        1139.00        1174.60          33.75
      1268        36.6510        1096.00        1174.75          33.11
      1269        36.6760        1076.00        1175.95          32.80
      1270        36.7010        1140.00        1178.45          33.76
      1271        36.7260        1169.00        1182.89          34.19
      1272        36.7510        1163.00        1190.97          34.10
      1273        36.7760        1193.00        1206.89          34.54
      1274        36.8010        1271.00        1239.68          35.65
      1275        36.8260        1343.00        1305.18          36.65
      1276        36.8510        1415.00        1424.03          37.62
      1277        36.8760        1574.00        1611.73          39.67
      1278        36.9010        1764.00        1860.36          42.00
      1279        36.9260        1986.00        2121.03          44.56
      1280        36.9510        2125.00        2304.90          46.10
      1281        36.9760        2192.00        2322.00          46.82
      1282        37.0010        2056.00        2157.74          45.34
      1283        37.0260        1839.00        1898.00          42.88
      1284        37.0510        1599.00        1642.34          39.99
      1285        37.0760        1364.00        1446.80          36.93
      1286        37.1010        1255.00        1323.17          35.43
      1287        37.1260        1219.00        1256.71          34.91
      1288        37.1510        1172.00        1225.62          34.23
      1289        37.1760        1127.00        1212.79          33.57
      1290        37.2010        1103.00        1208.55          33.21
      1291        37.2260        1140.00        1212.75          33.76
      1292        37.2510        1157.00        1216.24          34.01
      1293        37.2760        1132.00        1221.26          33.65
      1294        37.3010        1123.00        1228.40          33.51
      1295        37.3260        1085.00        1237.86          32.94
      1296        37.3510        1167.00        1249.98          34.16
      1297        37.3760        1176.00        1263.85          34.29
      1298        37.4010        1183.00        1283.16          34.39
      1299        37.4260        1222.00        1306.62          34.96
      1300        37.4510        1279.00        1337.90          35.76
      1301        37.4760        1382.00        1379.37          37.18
      1302        37.5010        1447.00        1438.54          38.04
      1303        37.5260        1613.00        1534.15          40.16
      1304        37.5510        1819.00        1711.37          42.65
      1305        37.5760        2151.00        2065.04          46.38
      1306        37.6010        2858.00        2759.05          53.46
      1307        37.6260        4066.00        4005.32          63.77
      1308        37.6510        5773.00        5963.37          75.98
      1309        37.6760        8241.00        8561.22          90.78
      1310        37.7010       11012.00       11316.00         104.94
      1311        37.7260       13198.00       13333.70         114.88
      1312        37.7510       13863.00       13682.80         117.74
      1313        37.7760       12476.00       12103.40         111.70
      1314        37.8010        9520.00        9415.43          97.57
      1315        37.8260        6348.00        6660.35          79.67
      1316        37.8510        3960.00        4471.93          62.93
      1317        37.8760        2565.00        3028.28          50.65
      1318        37.9010        1903.00        2209.15          43.62
      1319        37.9260        1575.00        1792.31          39.69
      1320        37.9510        1452.00        1588.96          38.11
      1321        37.9760        1349.00        1484.21          36.73
      1322        38.0010        1299.00        1422.74          36.04
      1323        38.0260        1257.00        1381.86          35.45
      1324        38.0510        1217.00        1352.84          34.89
      1325        38.0760        1216.00        1332.10          34.87
      1326        38.1010        1225.00        1317.91          35.00
      1327        38.1260        1142.00        1309.39          33.79
      1328        38.1510        1229.00        1304.91          35.06
      1329        38.1760        1217.00        1307.38          34.89
      1330        38.2010        1222.00        1316.97          34.96
      1331        38.2260        1239.00        1338.13          35.20
      1332        38.2510        1279.00        1382.32          35.76
      1333        38.2760        1356.00        1475.20          36.82
      1334        38.3010        1582.00        1664.69          39.77
      1335        38.3260        1893.00        2020.74          43.51
      1336        38.3510        2590.00        2613.15          50.89
      1337        38.3760        3564.00        3459.09          59.70
      1338        38.4010        4792.00        4457.78          69.22
      1339        38.4260        5812.00        5354.41          76.24
      1340        38.4510        6166.00        5800.86          78.52
      1341        38.4760        5949.00        5559.85          77.13
      1342        38.5010        4945.00        4752.02          70.32
      1343        38.5260        3865.00        3741.94          62.17
      1344        38.5510        2900.00        2835.64          53.85
      1345        38.5760        2116.00        2177.62          46.00
      1346        38.6010        1801.00        1775.60          42.44
      1347        38.6260        1630.00        1565.54          40.37
      1348        38.6510        1440.00        1471.93          37.95
      1349        38.6760        1429.00        1440.06          37.80
      1350        38.7010        1362.00        1440.88          36.91
      1351        38.7260        1356.00        1464.18          36.82
      1352        38.7510        1412.00        1513.49          37.58
      1353        38.7760        1597.00        1609.28          39.96
      1354        38.8010        1740.00        1802.91          41.71
      1355        38.8260        2236.00        2197.67          47.29
      1356        38.8510        3037.00        2961.03          55.11
      1357        38.8760        4452.00        4292.34          66.72
      1358        38.9010        6633.00        6316.31          81.44
      1359        38.9260        9452.00        8916.58          97.22
      1360        38.9510       12202.00       11574.80         110.46
      1361        38.9760       14417.00       13451.90         120.07
      1362        39.0010       14760.00       13670.30         121.49
      1363        39.0260       12903.00       12074.80         113.59
      1364        39.0510        9924.00        9441.72          99.62
      1365        39.0760        6661.00        6735.63          81.61
      1366        39.1010        4347.00        4554.90          65.93
      1367        39.1260        2934.00        3084.19          54.17
      1368        39.1510        2128.00        2226.35          46.13
      1369        39.1760        1738.00        1776.93          41.69
      1370        39.2010        1526.00        1552.42          39.06
      1371        39.2260        1365.00        1435.30          36.95
      1372        39.2510        1324.00        1365.98          36.39
      1373        39.2760        1295.00        1318.79          35.99
      1374        39.3010        1225.00        1283.54          35.00
      1375        39.3260        1207.00        1256.04          34.74
      1376        39.3510        1155.00        1234.17          33.99
      1377        39.3760        1151.00        1216.73          33.93
      1378        39.4010        1214.00        1206.27          34.84
      1379        39.4260        1209.00        1195.86          34.77
      1380        39.4510        1198.00        1188.85          34.61
      1381        39.4760        1214.00        1186.40          34.84
      1382        39.5010        1229.00        1191.76          35.06
      1383        39.5260        1289.00        1211.65          35.90
      1384        39.5510        1308.00        1257.15          36.17
      1385        39.5760        1399.00        1341.71          37.40
      1386        39.6010        1470.00        1474.32          38.34
      1387        39.6260        1624.00        1648.62          40.30
      1388        39.6510        1793.00        1832.88          42.34
      1389        39.6760        1857.00        1965.92          43.09
      1390        39.7010        1834.00        1994.71          42.83
      1391        39.7260        1808.00        1897.08          42.52
      1392        39.7510        1666.00        1718.24          40.82
      1393        39.7760        1462.00        1524.92          38.24
      1394        39.8010        1344.00        1362.58          36.66
      1395        39.8260        1258.00        1248.54          35.47
      1396        39.8510        1184.00        1179.11          34.41
      1397        39.8760        1133.00        1141.15          33.66
      1398        39.9010        1115.00        1121.44          33.39
      1399        39.9260        1061.00        1110.86          32.57
      1400        39.9510        1068.00        1104.50          32.68
      1401        39.9760        1079.00        1100.15          32.85
      1402        40.0010        1067.00        1096.91          32.67
      1403        40.0260        1065.00        1094.40          32.63
      1404        40.0510        1033.00        1092.66          32.14
      1405        40.0760        1049.00        1091.22          32.39
      1406        40.1010        1073.00        1090.22          32.76
      1407        40.1260        1062.00        1089.62          32.59
      1408        40.1510        1031.00        1089.41          32.11
      1409        40.1760        1082.00        1089.61          32.89
      1410        40.2010        1079.00        1090.24          32.85
      1411        40.2260        1072.00        1077.97          32.74
      1412        40.2510        1079.00        1080.13          32.85
      1413        40.2760        1075.00        1082.89          32.79
      1414        40.3010        1077.00        1086.38          32.82
      1415        40.3260        1081.00        1090.78          32.88
      1416        40.3510        1092.00        1096.34          33.05
      1417        40.3760        1083.00        1103.48          32.91
      1418        40.4010        1084.00        1112.94          32.92
      1419        40.4260        1147.00        1126.40          33.87
      1420        40.4510        1205.00        1147.90          34.71
      1421        40.4760        1250.00        1186.85          35.36
      1422        40.5010        1328.00        1262.66          36.44
      1423        40.5260        1518.00        1408.88          38.96
      1424        40.5510        1799.00        1671.15          42.41
      1425        40.5760        2110.00        2098.51          45.93
      1426        40.6010        2618.00        2681.63          51.17
      1427        40.6260        3249.00        3360.16          57.00
      1428        40.6510        3766.00        3974.21          61.37
      1429        40.6760        4022.00        4304.88          63.42
      1430        40.7010        3914.00        4193.53          62.56
      1431        40.7260        3471.00        3690.15          58.92
      1432        40.7510        2870.00        3010.98          53.57
      1433        40.7760        2247.00        2361.53          47.40
      1434        40.8010        1781.00        1855.70          42.20
      1435        40.8260        1491.00        1519.84          38.61
      1436        40.8510        1330.00        1324.29          36.47
      1437        40.8760        1229.00        1224.00          35.06
      1438        40.9010        1179.00        1171.86          34.34
      1439        40.9260        1144.00        1144.49          33.82
      1440        40.9510        1126.00        1127.52          33.56
      1441        40.9760        1081.00        1116.88          32.88
      1442        41.0010        1062.00        1109.21          32.59
      1443        41.0260        1078.00        1103.50          32.83
      1444        41.0510        1054.00        1099.28          32.47
      1445        41.0760        1051.00        1096.54          32.42
      1446        41.1010        1073.00        1094.70          32.76
      1447        41.1260        1109.00        1094.15          33.30
      1448        41.1510        1096.00        1095.44          33.11
      1449        41.1760        1098.00        1099.74          33.14
      1450        41.2010        1106.00        1109.09          33.26
      1451        41.2260        1098.00        1126.07          33.14
      1452        41.2510        1157.00        1152.79          34.01
      1453        41.2760        1202.00        1188.93          34.67
      1454        41.3010        1220.00        1229.87          34.93
      1455        41.3260        1259.00        1265.91          35.48
      1456        41.3510        1322.00        1284.75          36.36
      1457        41.3760        1300.00        1278.73          36.06
      1458        41.4010        1272.00        1252.31          35.67
      1459        41.4260        1235.00        1218.11          35.14
      1460        41.4510        1164.00        1187.39          34.12
      1461        41.4760        1130.00        1166.34          33.62
      1462        41.5010        1130.00        1156.44          33.62
      1463        41.5260        1081.00        1156.32          32.88
      1464        41.5510        1073.00        1163.79          32.76
      1465        41.5760        1086.00        1177.32          32.95
      1466        41.6010        1131.00        1196.75          33.63
      1467        41.6260        1146.00        1224.02          33.85
      1468        41.6510        1164.00        1265.04          34.12
      1469        41.6760        1223.00        1334.38          34.97
      1470        41.7010        1318.00        1463.67          36.30
      1471        41.7260        1475.00        1711.97          38.41
      1472        41.7510        1862.00        2169.46          43.15
      1473        41.7760        2681.00        2939.49          51.78
      1474        41.8010        3931.00        4087.51          62.70
      1475        41.8260        5692.00        5563.10          75.45
      1476        41.8510        7714.00        7134.32          87.83
      1477        41.8760        9241.00        8379.76          96.13
      1478        41.9010        9564.00        8821.36          97.80
      1479        41.9260        8971.00        8245.75          94.72
      1480        41.9510        7338.00        6924.88          85.66
      1481        41.9760        5555.00        5367.54          74.53
      1482        42.0010        3875.00        3999.18          62.25
      1483        42.0260        2927.00        3042.84          54.10
      1484        42.0510        2436.00        2559.46          49.36
      1485        42.0760        2455.00        2505.18          49.55
      1486        42.1010        2692.00        2782.35          51.88
      1487        42.1260        3384.00        3257.62          58.17
      1488        42.1510        3897.00        3758.25          62.43
      1489        42.1760        4349.00        4078.92          65.95
      1490        42.2010        4179.00        4056.46          64.65
      1491        42.2260        3881.00        3684.07          62.30
      1492        42.2510        3235.00        3118.51          56.88
      1493        42.2760        2560.00        2544.14          50.60
      1494        42.3010        2063.00        2081.38          45.42
      1495        42.3260        1801.00        1774.12          42.44
      1496        42.3510        1650.00        1600.89          40.62
      1497        42.3760        1595.00        1512.13          39.94
      1498        42.4010        1574.00        1454.39          39.67
      1499        42.4260        1428.00        1394.36          37.79
      1500        42.4510        1339.00        1325.96          36.59
      1501        42.4760        1270.00        1257.78          35.64
      1502        42.5010        1251.00        1199.02          35.37
      1503        42.5260        1161.00        1154.34          34.07
      1504        42.5510        1101.00        1123.60          33.18
      1505        42.5760        1049.00        1103.77          32.39
      1506        42.6010        1088.00        1091.14          32.98
      1507        42.6260        1095.00        1082.76          33.09
      1508        42.6510        1077.00        1076.75          32.82
      1509        42.6760        1054.00        1071.92          32.47
      1510        42.7010        1059.00        1068.17          32.54
      1511        42.7260        1044.00        1065.08          32.31
      1512        42.7510        1006.00        1062.53          31.72
      1513        42.7760        1040.00        1060.47          32.25
      1514        42.8010        1041.00        1058.86          32.26
      1515        42.8260        1062.00        1057.67          32.59
      1516        42.8510        1069.00        1056.92          32.70
      1517        42.8760        1088.00        1056.63          32.98
      1518        42.9010        1128.00        1056.86          33.59
      1519        42.9260        1118.00        1057.74          33.44
      1520        42.9510        1047.00        1067.00          32.36
      1521        42.9760        1050.00        1070.92          32.40
      1522        43.0010        1129.00        1078.37          33.60
      1523        43.0260        1189.00        1092.83          34.48
      1524        43.0510        1135.00        1120.21          33.69
      1525        43.0760        1278.00        1168.45          35.75
      1526        43.1010        1371.00        1245.24          37.03
      1527        43.1260        1458.00        1353.03          38.18
      1528        43.1510        1644.00        1483.16          40.55
      1529        43.1760        1805.00        1611.99          42.49
      1530        43.2010        1911.00        1703.01          43.72
      1531        43.2260        2013.00        1716.14          44.87
      1532        43.2510        1878.00        1655.63          43.34
      1533        43.2760        1645.00        1546.08          40.56
      1534        43.3010        1601.00        1430.77          40.01
      1535        43.3260        1497.00        1345.41          38.69
      1536        43.3510        1414.00        1313.56          37.60
      1537        43.3760        1374.00        1347.70          37.07
      1538        43.4010        1465.00        1449.75          38.28
      1539        43.4260        1511.00        1612.38          38.87
      1540        43.4510        1610.00        1801.17          40.12
      1541        43.4760        1748.00        1974.47          41.81
      1542        43.5010        1841.00        2080.30          42.91
      1543        43.5260        1817.00        2087.76          42.63
      1544        43.5510        1824.00        2029.99          42.71
      1545        43.5760        1858.00        1973.09          43.10
      1546        43.6010        1981.00        1978.87          44.51
      1547        43.6260        2176.00        2071.55          46.65
      1548        43.6510        2386.00        2226.94          48.85
      1549        43.6760        2614.00        2377.19          51.13
      1550        43.7010        2665.00        2436.01          51.62
      1551        43.7260        2532.00        2349.81          50.32
      1552        43.7510        2281.00        2140.72          47.76
      1553        43.7760        1934.00        1879.03          43.98
      1554        43.8010        1650.00        1630.49          40.62
      1555        43.8260        1451.00        1433.67          38.09
      1556        43.8510        1292.00        1299.47          35.94
      1557        43.8760        1176.00        1219.86          34.29
      1558        43.9010        1205.00        1179.04          34.71
      1559        43.9260        1187.00        1162.03          34.45
      1560        43.9510        1151.00        1158.50          33.93
      1561        43.9760        1210.00        1162.82          34.79
      1562        44.0010        1257.00        1172.64          35.45
      1563        44.0260        1317.00        1188.32          36.29
      1564        44.0510        1350.00        1209.90          36.74
      1565        44.0760        1416.00        1242.11          37.63
      1566        44.1010        1576.00        1294.76          39.70
      1567        44.1260        1794.00        1389.28          42.36
      1568        44.1510        2023.00        1567.03          44.98
      1569        44.1760        2376.00        1895.86          48.74
      1570        44.2010        2990.00        2464.78          54.68
      1571        44.2260        3810.00        3356.93          61.73
      1572        44.2510        4795.00        4595.48          69.25
      1573        44.2760        5991.00        6081.76          77.40
      1574        44.3010        7190.00        7556.93          84.79
      1575        44.3260        8051.00        8616.08          89.73
      1576        44.3510        8309.00        8866.03          91.15
      1577        44.3760        7935.00        8197.20          89.08
      1578        44.4010        7027.00        6902.38          83.83
      1579        44.4260        5796.00        5432.64          76.13
      1580        44.4510        4559.00        4150.98          67.52
      1581        44.4760        3614.00        3259.71          60.12
      1582        44.5010        3084.00        2813.89          55.53
      1583        44.5260        2928.00        2761.57          54.11
      1584        44.5510        3004.00        2987.79          54.81
      1585        44.5760        3193.00        3344.11          56.51
      1586        44.6010        3399.00        3672.80          58.30
      1587        44.6260        3514.00        3841.91          59.28
      1588        44.6510        3506.00        3821.42          59.21
      1589        44.6760        3510.00        3717.56          59.25
      1590        44.7010        3725.00        3691.12          61.03
      1591        44.7260        4121.00        3849.35          64.19
      1592        44.7510        4738.00        4191.24          68.83
      1593        44.7760        5353.00        4597.94          73.16
      1594        44.8010        5726.00        4868.53          75.67
      1595        44.8260        5658.00        4820.27          75.22
      1596        44.8510        5215.00        4422.05          72.21
      1597        44.8760        4320.00        3806.03          65.73
      1598        44.9010        3439.00        3145.44          58.64
      1599        44.9260        2684.00        2555.64          51.81
      1600        44.9510        2150.00        2088.47          46.37
      1601        44.9760        1800.00        1748.20          42.43
      1602        45.0010        1586.00        1515.41          39.82
      1603        45.0260        1426.00        1362.35          37.76
      1604        45.0510        1320.00        1263.75          36.33
      1605        45.0760        1235.00        1199.74          35.14
      1606        45.1010        1176.00        1160.23          34.29
      1607        45.1260        1169.00        1135.50          34.19
      1608        45.1510        1163.00        1120.10          34.10
      1609        45.1760        1146.00        1110.92          33.85
      1610        45.2010        1146.00        1106.95          33.85
      1611        45.2260        1193.00        1109.21          34.54
      1612        45.2510        1160.00        1121.11          34.06
      1613        45.2760        1167.00        1148.65          34.16
      1614        45.3010        1276.00        1199.71          35.72
      1615        45.3260        1376.00        1282.66          37.09
      1616        45.3510        1459.00        1396.45          38.20
      1617        45.3760        1584.00        1533.18          39.80
      1618        45.4010        1710.00        1669.68          41.35
      1619        45.4260        1824.00        1770.84          42.71
      1620        45.4510        1811.00        1802.26          42.56
      1621        45.4760        1805.00        1754.89          42.49
      1622        45.5010        1744.00        1657.46          41.76
      1623        45.5260        1640.00        1558.20          40.50
      1624        45.5510        1517.00        1502.93          38.95
      1625        45.5760        1614.00        1525.60          40.17
      1626        45.6010        1724.00        1642.57          41.52
      1627        45.6260        1959.00        1846.90          44.26
      1628        45.6510        2130.00        2103.98          46.15
      1629        45.6760        2459.00        2351.22          49.59
      1630        45.7010        2561.00        2508.00          50.61
      1631        45.7260        2581.00        2508.27          50.80
      1632        45.7510        2317.00        2339.79          48.14
      1633        45.7760        2058.00        2077.58          45.37
      1634        45.8010        1753.00        1790.73          41.87
      1635        45.8260        1479.00        1536.05          38.46
      1636        45.8510        1307.00        1341.41          36.15
      1637        45.8760        1186.00        1210.15          34.44
      1638        45.9010        1107.00        1130.52          33.27
      1639        45.9260        1046.00        1086.00          32.34
      1640        45.9510        1044.00        1062.24          32.31
      1641        45.9760        1042.00        1049.54          32.28
      1642        46.0010        1047.00        1042.45          32.36
      1643        46.0260        1056.00        1036.14          32.50
      1644        46.0510        1054.00        1034.27          32.47
      1645        46.0760         994.00        1034.58          31.53
      1646        46.1010        1057.00        1038.21          32.51
      1647        46.1260        1041.00        1047.63          32.26
      1648        46.1510        1080.00        1067.14          32.86
      1649        46.1760        1153.00        1102.74          33.96
      1650        46.2010        1134.00        1160.70          33.67
      1651        46.2260        1213.00        1241.24          34.83
      1652        46.2510        1278.00        1347.77          35.75
      1653        46.2760        1387.00        1463.25          37.24
      1654        46.3010        1472.00        1563.17          38.37
      1655        46.3260        1679.00        1617.16          40.98
      1656        46.3510        1640.00        1603.99          40.50
      1657        46.3760        1543.00        1531.96          39.28
      1658        46.4010        1465.00        1423.22          38.28
      1659        46.4260        1299.00        1310.00          36.04
      1660        46.4510        1168.00        1212.99          34.18
      1661        46.4760        1078.00        1141.69          32.83
      1662        46.5010        1029.00        1097.11          32.08
      1663        46.5260        1082.00        1074.71          32.89
      1664        46.5510        1115.00        1070.99          33.39
      1665        46.5760        1120.00        1085.90          33.47
      1666        46.6010        1146.00        1125.06          33.85
      1667        46.6260        1180.00        1199.78          34.35
      1668        46.6510        1353.00        1323.96          36.78
      1669        46.6760        1566.00        1507.51          39.57
      1670        46.7010        1775.00        1746.86          42.13
      1671        46.7260        2044.00        2016.55          45.21
      1672        46.7510        2401.00        2265.73          49.00
      1673        46.7760        2496.00        2425.42          49.96
      1674        46.8010        2494.00        2437.10          49.94
      1675        46.8260        2302.00        2294.83          47.98
      1676        46.8510        2069.00        2051.75          45.49
      1677        46.8760        1747.00        1778.11          41.80
      1678        46.9010        1466.00        1530.01          38.29
      1679        46.9260        1256.00        1337.09          35.44
      1680        46.9510        1174.00        1202.59          34.26
      1681        46.9760        1100.00        1118.79          33.17
      1682        47.0010        1060.00        1070.80          32.56
      1683        47.0260        1073.00        1044.71          32.76
      1684        47.0510        1026.00        1030.56          32.03
      1685        47.0760        1007.00        1022.44          31.73
      1686        47.1010        1015.00        1017.32          31.86
      1687        47.1260        1027.00        1019.80          32.05
      1688        47.1510        1007.00        1016.05          31.73
      1689        47.1760        1005.00        1014.41          31.70
      1690        47.2010         997.00        1013.33          31.58
      1691        47.2260         986.00        1012.71          31.40
      1692        47.2510        1007.00        1012.52          31.73
      1693        47.2760        1046.00        1012.72          32.34
      1694        47.3010        1011.00        1013.31          31.80
      1695        47.3260        1063.00        1014.28          32.60
      1696        47.3510        1025.00        1015.67          32.02
      1697        47.3760        1080.00        1017.49          32.86
      1698        47.4010        1060.00        1019.82          32.56
      1699        47.4260        1036.00        1022.71          32.19
      1700        47.4510        1036.00        1026.27          32.19
      1701        47.4760        1065.00        1030.65          32.63
      1702        47.5010        1075.00        1036.07          32.79
      1703        47.5260        1095.00        1043.66          33.09
      1704        47.5510        1129.00        1052.83          33.60
      1705        47.5760        1193.00        1066.11          34.54
      1706        47.6010        1181.00        1087.43          34.37
      1707        47.6260        1212.00        1124.69          34.81
      1708        47.6510        1328.00        1193.29          36.44
      1709        47.6760        1481.00        1313.22          38.48
      1710        47.7010        1596.00        1509.87          39.95
      1711        47.7260        1768.00        1808.40          42.05
      1712        47.7510        2144.00        2216.09          46.30
      1713        47.7760        2580.00        2708.07          50.79
      1714        47.8010        2891.00        3216.77          53.77
      1715        47.8260        3178.00        3636.00          56.37
      1716        47.8510        3426.00        3846.24          58.53
      1717        47.8760        3482.00        3781.59          59.01
      1718        47.9010        3321.00        3484.30          57.63
      1719        47.9260        2972.00        3067.97          54.52
      1720        47.9510        2571.00        2640.62          50.71
      1721        47.9760        2246.00        2266.47          47.39
      1722        48.0010        2021.00        1965.36          44.96
      1723        48.0260        1812.00        1730.49          42.57
      1724        48.0510        1625.00        1549.44          40.31
      1725        48.0760        1453.00        1412.31          38.12
      1726        48.1010        1359.00        1311.58          36.86
      1727        48.1260        1276.00        1241.68          35.72
      1728        48.1510        1219.00        1198.17          34.91
      1729        48.1760        1171.00        1177.40          34.22
      1730        48.2010        1172.00        1177.57          34.23
      1731        48.2260        1248.00        1200.56          35.33
      1732        48.2510        1315.00        1252.13          36.26
      1733        48.2760        1351.00        1347.33          36.76
      1734        48.3010        1462.00        1499.43          38.24
      1735        48.3260        1701.00        1719.36          41.24
      1736        48.3510        2065.00        2007.81          45.44
      1737        48.3760        2477.00        2345.16          49.77
      1738        48.4010        2904.00        2699.42          53.89
      1739        48.4260        3281.00        3033.14          57.28
      1740        48.4510        3635.00        3333.37          60.29
      1741        48.4760        3905.00        3648.30          62.49
      1742        48.5010        4227.00        4081.17          65.02
      1743        48.5260        4707.00        4723.33          68.61
      1744        48.5510        5452.00        5583.13          73.84
      1745        48.5760        6311.00        6547.72          79.44
      1746        48.6010        7163.00        7385.07          84.63
      1747        48.6260        7725.00        7802.85          87.89
      1748        48.6510        7610.00        7597.51          87.24
      1749        48.6760        6889.00        6806.58          83.00
      1750        48.7010        5859.00        5672.63          76.54
      1751        48.7260        4621.00        4471.45          67.98
      1752        48.7510        3447.00        3406.18          58.71
      1753        48.7760        2649.00        2581.47          51.47
      1754        48.8010        2129.00        2015.10          46.14
      1755        48.8260        1773.00        1671.10          42.11
      1756        48.8510        1550.00        1493.17          39.37
      1757        48.8760        1460.00        1431.86          38.21
      1758        48.9010        1484.00        1453.56          38.52
      1759        48.9260        1639.00        1538.76          40.48
      1760        48.9510        1742.00        1675.18          41.74
      1761        48.9760        1933.00        1851.74          43.97
      1762        49.0010        2119.00        2056.24          46.03
      1763        49.0260        2375.00        2277.93          48.73
      1764        49.0510        2580.00        2516.62          50.79
      1765        49.0760        2819.00        2789.58          53.09
      1766        49.1010        3178.00        3116.66          56.37
      1767        49.1260        3647.00        3487.96          60.39
      1768        49.1510        4201.00        3845.16          64.82
      1769        49.1760        4531.00        4089.71          67.31
      1770        49.2010        4716.00        4123.47          68.67
      1771        49.2260        4317.00        3907.79          65.70
      1772        49.2510        3790.00        3490.05          61.56
      1773        49.2760        3116.00        2972.96          55.82
      1774        49.3010        2493.00        2459.82          49.93
      1775        49.3260        1966.00        2020.91          44.34
      1776        49.3510        1596.00        1683.64          39.95
      1777        49.3760        1348.00        1450.78          36.72
      1778        49.4010        1216.00        1299.29          34.87
      1779        49.4260        1139.00        1204.38          33.75
      1780        49.4510        1088.00        1145.34          32.98
      1781        49.4760        1048.00        1107.79          32.37
      1782        49.5010        1077.00        1082.73          32.82
      1783        49.5260        1054.00        1066.83          32.47
      1784        49.5510        1004.00        1055.75          31.69
      1785        49.5760        1011.00        1048.77          31.80
      1786        49.6010        1063.00        1045.21          32.60
      1787        49.6260        1015.00        1045.25          31.86
      1788        49.6510        1075.00        1050.29          32.79
      1789        49.6760        1033.00        1063.71          32.14
      1790        49.7010        1113.00        1091.68          33.36
      1791        49.7260        1135.00        1143.66          33.69
      1792        49.7510        1216.00        1231.47          34.87
      1793        49.7760        1330.00        1366.07          36.47
      1794        49.8010        1535.00        1552.01          39.18
      1795        49.8260        1824.00        1780.68          42.71
      1796        49.8510        2079.00        2025.52          45.60
      1797        49.8760        2421.00        2241.22          49.20
      1798        49.9010        2600.00        2372.02          50.99
      1799        49.9260        2714.00        2376.40          52.10
      1800        49.9510        2416.00        2248.66          49.15
      1801        49.9760        2223.00        2034.44          47.15
      1802        50.0010        1832.00        1787.79          42.80
      1803        50.0260        1555.00        1555.22          39.43
      1804        50.0510        1384.00        1363.61          37.20
      1805        50.0760        1183.00        1223.08          34.39
      1806        50.1010        1094.00        1129.88          33.08
      1807        50.1260        1040.00        1073.58          32.25
      1808        50.1510        1017.00        1038.12          31.89
      1809        50.1760        1040.00        1025.06          32.25
      1810        50.2010        1053.00        1023.68          32.45
      1811        50.2260        1081.00        1032.64          32.88
      1812        50.2510        1026.00        1051.98          32.03
      1813        50.2760        1057.00        1081.69          32.51
      1814        50.3010        1108.00        1120.06          33.29
      1815        50.3260        1133.00        1162.48          33.66
      1816        50.3510        1234.00        1201.06          35.13
      1817        50.3760        1272.00        1225.79          35.67
      1818        50.4010        1257.00        1228.22          35.45
      1819        50.4260        1210.00        1206.89          34.79
      1820        50.4510        1240.00        1168.68          35.21
      1821        50.4760        1181.00        1123.91          34.37
      1822        50.5010        1082.00        1080.59          32.89
      1823        50.5260        1009.00        1044.47          31.76
      1824        50.5510         960.00        1017.64          30.98
      1825        50.5760         942.00         998.99          30.69
      1826        50.6010         990.00         988.06          31.46
      1827        50.6260         964.00         981.99          31.05
      1828        50.6510         938.00         978.96          30.63
      1829        50.6760         935.00         977.72          30.58
      1830        50.7010         971.00         977.54          31.16
      1831        50.7260         962.00         976.73          31.02
      1832        50.7510        1015.00         976.64          31.86
      1833        50.7760         951.00         978.64          30.84
      1834        50.8010         956.00         981.74          30.92
      1835        50.8260         967.00         986.76          31.10
      1836        50.8510         942.00         995.38          30.69
      1837        50.8760         972.00        1010.55          31.18
      1838        50.9010        1033.00        1036.89          32.14
      1839        50.9260        1046.00        1080.53          32.34
      1840        50.9510        1095.00        1148.02          33.09
      1841        50.9760        1195.00        1244.71          34.57
      1842        51.0010        1360.00        1367.13          36.88
      1843        51.0260        1548.00        1506.32          39.34
      1844        51.0510        1744.00        1642.22          41.76
      1845        51.0760        1887.00        1746.27          43.44
      1846        51.1010        1969.00        1789.54          44.37
      1847        51.1260        1941.00        1758.26          44.06
      1848        51.1510        1804.00        1664.20          42.47
      1849        51.1760        1637.00        1536.39          40.46
      1850        51.2010        1443.00        1404.57          37.99
      1851        51.2260        1269.00        1290.74          35.62
      1852        51.2510        1118.00        1208.86          33.44
      1853        51.2760        1073.00        1163.23          32.76
      1854        51.3010        1101.00        1157.97          33.18
      1855        51.3260        1096.00        1197.54          33.11
      1856        51.3510        1211.00        1289.62          34.80
      1857        51.3760        1366.00        1443.36          36.96
      1858        51.4010        1633.00        1664.10          40.41
      1859        51.4260        1966.00        1946.30          44.34
      1860        51.4510        2387.00        2267.06          48.86
      1861        51.4760        2865.00        2583.21          53.53
      1862        51.5010        3159.00        2839.84          56.21
      1863        51.5260        3294.00        2982.99          57.39
      1864        51.5510        3259.00        2996.35          57.09
      1865        51.5760        3058.00        2915.20          55.30
      1866        51.6010        2823.00        2800.93          53.13
      1867        51.6260        2679.00        2708.41          51.76
      1868        51.6510        2552.00        2672.93          50.52
      1869        51.6760        2600.00        2708.76          50.99
      1870        51.7010        2821.00        2805.54          53.11
      1871        51.7260        3034.00        2923.58          55.08
      1872        51.7510        3056.00        3000.08          55.28
      1873        51.7760        3050.00        2971.87          55.23
      1874        51.8010        2885.00        2811.41          53.71
      1875        51.8260        2520.00        2544.28          50.20
      1876        51.8510        2182.00        2228.05          46.71
      1877        51.8760        1891.00        1920.53          43.49
      1878        51.9010        1611.00        1663.78          40.14
      1879        51.9260        1436.00        1480.17          37.89
      1880        51.9510        1351.00        1374.16          36.76
      1881        51.9760        1305.00        1336.34          36.12
      1882        52.0010        1254.00        1349.76          35.41
      1883        52.0260        1270.00        1392.34          35.64
      1884        52.0510        1313.00        1440.58          36.24
      1885        52.0760        1340.00        1472.09          36.61
      1886        52.1010        1315.00        1470.47          36.26
      1887        52.1260        1269.00        1431.35          35.62
      1888        52.1510        1266.00        1363.79          35.58
      1889        52.1760        1209.00        1283.43          34.77
      1890        52.2010        1136.00        1204.82          33.70
      1891        52.2260        1109.00        1137.62          33.30
      1892        52.2510        1084.00        1086.46          32.92
      1893        52.2760        1062.00        1051.65          32.59
      1894        52.3010        1019.00        1031.07          31.92
      1895        52.3260        1037.00        1022.11          32.20
      1896        52.3510        1026.00        1023.38          32.03
      1897        52.3760        1011.00        1035.91          31.80
      1898        52.4010        1105.00        1063.83          33.24
      1899        52.4260        1118.00        1114.50          33.44
      1900        52.4510        1197.00        1197.25          34.60
      1901        52.4760        1343.00        1320.74          36.65
      1902        52.5010        1495.00        1488.54          38.67
      1903        52.5260        1647.00        1694.25          40.58
      1904        52.5510        1889.00        1918.13          43.46
      1905        52.5760        1986.00        2126.37          44.56
      1906        52.6010        2085.00        2276.20          45.66
      1907        52.6260        2182.00        2330.34          46.71
      1908        52.6510        2171.00        2280.48          46.59
      1909        52.6760        2064.00        2155.78          45.43
      1910        52.7010        1964.00        2004.09          44.32
      1911        52.7260        1870.00        1872.29          43.24
      1912        52.7510        1785.00        1791.30          42.25
      1913        52.7760        1743.00        1775.43          41.75
      1914        52.8010        1806.00        1822.41          42.50
      1915        52.8260        1879.00        1914.95          43.35
      1916        52.8510        1972.00        2022.23          44.41
      1917        52.8760        2010.00        2103.80          44.83
      1918        52.9010        2059.00        2120.23          45.38
      1919        52.9260        1991.00        2051.64          44.62
      1920        52.9510        1862.00        1909.58          43.15
      1921        52.9760        1693.00        1726.61          41.15
      1922        53.0010        1511.00        1537.17          38.87
      1923        53.0260        1389.00        1367.03          37.27
      1924        53.0510        1185.00        1230.30          34.42
      1925        53.0760        1177.00        1130.62          34.31
      1926        53.1010        1069.00        1064.07          32.70
      1927        53.1260        1042.00        1022.07          32.28
      1928        53.1510         988.00         999.33          31.43
      1929        53.1760         962.00         988.68          31.02
      1930        53.2010         924.00         986.35          30.40
      1931        53.2260         990.00         990.41          31.46
      1932        53.2510         954.00         999.56          30.89
      1933        53.2760         956.00        1014.04          30.92
      1934        53.3010         944.00        1032.55          30.72
      1935        53.3260        1019.00        1053.26          31.92
      1936        53.3510        1029.00        1073.69          32.08
      1937        53.3760        1015.00        1091.12          31.86
      1938        53.4010        1081.00        1101.86          32.88
      1939        53.4260        1052.00        1107.39          32.43
      1940        53.4510        1025.00        1104.90          32.02
      1941        53.4760         968.00        1094.60          31.11
      1942        53.5010         945.00        1079.09          30.74
      1943        53.5260         946.00        1062.21          30.76
      1944        53.5510        1008.00        1047.01          31.75
      1945        53.5760        1030.00        1034.73          32.09
      1946        53.6010         945.00        1024.84          30.74
      1947        53.6260         924.00        1015.80          30.40
      1948        53.6510         981.00        1006.34          31.32
      1949        53.6760         952.00         996.48          30.85
      1950        53.7010         928.00         987.51          30.46
      1951        53.7260         931.00         980.39          30.51
      1952        53.7510         948.00         976.71          30.79
      1953        53.7760         989.00         976.89          31.45
      1954        53.8010         940.00         978.68          30.66
      1955        53.8260         998.00         980.94          31.59
      1956        53.8510         988.00         981.72          31.43
      1957        53.8760        1026.00         979.45          32.03
      1958        53.9010         922.00         973.86          30.36
      1959        53.9260         917.00         967.00          30.28
      1960        53.9510         905.00         958.22          30.08
      1961        53.9760         888.00         949.82          29.80
      1962        54.0010         953.00         942.67          30.87
      1963        54.0260         904.00         937.13          30.07
      1964        54.0510         875.00         933.18          29.58
      1965        54.0760         917.00         930.55          30.28
      1966        54.1010         889.00         928.89          29.82
      1967        54.1260         870.00         927.86          29.50
      1968        54.1510         860.00         927.23          29.33
      1969        54.1760         901.00         926.84          30.02
      1970        54.2010         867.00         926.59          29.44
      1971        54.2260         861.00         926.45          29.34
      1972        54.2510         882.00         926.38          29.70
      1973        54.2760         867.00         925.29          29.44
      1974        54.3010         921.00         925.40          30.35
      1975        54.3260         895.00         925.58          29.92
      1976        54.3510         851.00         925.84          29.17
      1977        54.3760         852.00         926.19          29.19
      1978        54.4010         928.00         926.64          30.46
      1979        54.4260         952.00         927.11          30.85
      1980        54.4510         914.00         927.89          30.23
      1981        54.4760         900.00         928.93          30.00
      1982        54.5010         864.00         930.44          29.39
      1983        54.5260         907.00         932.78          30.12
      1984        54.5510         910.00         935.72          30.17
      1985        54.5760         891.00         942.35          29.85
      1986        54.6010         898.00         953.54          29.97
      1987        54.6260         902.00         971.74          30.03
      1988        54.6510         926.00         999.66          30.43
      1989        54.6760         935.00        1039.53          30.58
      1990        54.7010         979.00        1091.73          31.29
      1991        54.7260        1080.00        1153.98          32.86
      1992        54.7510        1186.00        1220.29          34.44
      1993        54.7760        1202.00        1281.12          34.67
      1994        54.8010        1269.00        1324.69          35.62
      1995        54.8260        1319.00        1340.79          36.32
      1996        54.8510        1300.00        1326.52          36.06
      1997        54.8760        1257.00        1288.48          35.45
      1998        54.9010        1199.00        1238.21          34.63
      1999        54.9260        1140.00        1186.35          33.76
      2000        54.9510        1113.00        1139.79          33.36
      2001        54.9760        1092.00        1101.13          33.05
      2002        55.0010        1042.00        1069.72          32.28
      2003        55.0260        1010.00        1043.61          31.78
      2004        55.0510        1055.00        1021.55          32.48
      2005        55.0760        1047.00        1003.28          32.36
      2006        55.1010        1015.00         988.28          31.86
      2007        55.1260        1014.00         976.87          31.84
      2008        55.1510         995.00         969.45          31.54
      2009        55.1760         974.00         966.09          31.21
      2010        55.2010         994.00         967.17          31.53
      2011        55.2260        1011.00         973.71          31.80
      2012        55.2510        1044.00         987.87          32.31
      2013        55.2760        1059.00        1013.45          32.54
      2014        55.3010        1130.00        1055.98          33.62
      2015        55.3260        1198.00        1122.38          34.61
      2016        55.3510        1302.00        1219.37          36.08
      2017        55.3760        1430.00        1351.52          37.82
      2018        55.4010        1576.00        1518.81          39.70
      2019        55.4260        1783.00        1715.12          42.23
      2020        55.4510        2019.00        1927.56          44.93
      2021        55.4760        2217.00        2135.41          47.08
      2022        55.5010        2393.00        2317.57          48.92
      2023        55.5260        2448.00        2459.71          49.48
      2024        55.5510        2451.00        2560.13          49.51
      2025        55.5760        2448.00        2622.25          49.48
      2026        55.6010        2478.00        2642.20          49.78
      2027        55.6260        2484.00        2605.58          49.84
      2028        55.6510        2334.00        2497.03          48.31
      2029        55.6760        2199.00        2317.34          46.89
      2030        55.7010        2029.00        2089.23          45.04
      2031        55.7260        1803.00        1845.04          42.46
      2032        55.7510        1604.00        1613.68          40.05
      2033        55.7760        1390.00        1414.75          37.28
      2034        55.8010        1244.00        1257.62          35.27
      2035        55.8260        1125.00        1142.83          33.54
      2036        55.8510        1065.00        1064.66          32.63
      2037        55.8760         999.00        1014.53          31.61
      2038        55.9010         940.00         983.75          30.66
      2039        55.9260         955.00         965.20          30.90
      2040        55.9510         929.00         953.85          30.48
      2041        55.9760         935.00         946.52          30.58
      2042        56.0010         945.00         941.42          30.74
      2043        56.0260         925.00         937.60          30.41
      2044        56.0510         923.00         934.58          30.38
      2045        56.0760         946.00         932.12          30.76
      2046        56.1010         900.00         930.12          30.00
      2047        56.1260         920.00         928.55          30.33
      2048        56.1510         890.00         927.44          29.83
      2049        56.1760         891.00         926.90          29.85
      2050        56.2010         947.00         927.17          30.77
      2051        56.2260         956.00         928.58          30.92
      2052        56.2510         948.00         933.52          30.79
      2053        56.2760         984.00         938.54          31.37
      2054        56.3010         974.00         945.82          31.21
      2055        56.3260         980.00         955.27          31.31
      2056        56.3510         969.00         966.28          31.13
      2057        56.3760         963.00         977.61          31.03
      2058        56.4010         997.00         987.46          31.58
      2059        56.4260        1035.00         993.77          32.17
      2060        56.4510        1034.00         994.92          32.16
      2061        56.4760         966.00         990.72          31.08
      2062        56.5010         991.00         982.59          31.48
      2063        56.5260         975.00         972.86          31.23
      2064        56.5510         907.00         963.62          30.12
      2065        56.5760         920.00         957.78          30.33
      2066        56.6010         949.00         957.07          30.81
      2067        56.6260        1002.00         963.45          31.65
      2068        56.6510         924.00         978.75          30.40
      2069        56.6760         974.00        1004.36          31.21
      2070        56.7010        1050.00        1040.69          32.40
      2071        56.7260        1063.00        1086.35          32.60
      2072        56.7510        1113.00        1137.84          33.36
      2073        56.7760        1184.00        1188.57          34.41
      2074        56.8010        1221.00        1230.08          34.94
      2075        56.8260        1187.00        1253.30          34.45
      2076        56.8510        1206.00        1252.27          34.73
      2077        56.8760        1252.00        1227.71          35.38
      2078        56.9010        1139.00        1186.84          33.75
      2079        56.9260        1091.00        1139.44          33.03
      2080        56.9510        1095.00        1094.83          33.09
      2081        56.9760        1089.00        1060.56          33.00
      2082        57.0010        1036.00        1042.41          32.19
      2083        57.0260        1044.00        1044.60          32.31
      2084        57.0510        1071.00        1070.05          32.73
      2085        57.0760        1129.00        1120.16          33.60
      2086        57.1010        1149.00        1194.02          33.90
      2087        57.1260        1284.00        1287.14          35.83
      2088        57.1510        1339.00        1390.47          36.59
      2089        57.1760        1574.00        1490.20          39.67
      2090        57.2010        1587.00        1568.76          39.84
      2091        57.2260        1710.00        1608.80          41.35
      2092        57.2510        1666.00        1599.81          40.82
      2093        57.2760        1622.00        1546.81          40.27
      2094        57.3010        1535.00        1463.54          39.18
      2095        57.3260        1406.00        1366.91          37.50
      2096        57.3510        1260.00        1270.87          35.50
      2097        57.3760        1137.00        1183.92          33.72
      2098        57.4010        1086.00        1112.47          32.95
      2099        57.4260        1056.00        1056.90          32.50
      2100        57.4510         952.00        1016.06          30.85
      2101        57.4760        1004.00         987.42          31.69
      2102        57.5010         976.00         968.16          31.24
      2103        57.5260         957.00         955.73          30.94
      2104        57.5510         990.00         948.16          31.46
      2105        57.5760         985.00         944.04          31.38
      2106        57.6010        1020.00         942.88          31.94
      2107        57.6260         949.00         943.04          30.81
      2108        57.6510         969.00         945.89          31.13
      2109        57.6760         999.00         949.05          31.61
      2110        57.7010         961.00         954.03          31.00
      2111        57.7260        1000.00         961.80          31.62
      2112        57.7510        1036.00         974.49          32.19
      2113        57.7760        1063.00         995.56          32.60
      2114        57.8010        1079.00        1031.30          32.85
      2115        57.8260        1042.00        1090.94          32.28
      2116        57.8510        1171.00        1186.84          34.22
      2117        57.8760        1315.00        1332.76          36.26
      2118        57.9010        1332.00        1540.69          36.50
      2119        57.9260        1563.00        1815.82          39.53
      2120        57.9510        1951.00        2150.53          44.17
      2121        57.9760        2290.00        2520.47          47.85
      2122        58.0010        2690.00        2882.93          51.87
      2123        58.0260        3028.00        3179.90          55.03
      2124        58.0510        3384.00        3349.10          58.17
      2125        58.0760        3450.00        3347.08          58.74
      2126        58.1010        3379.00        3174.34          58.13
      2127        58.1260        3013.00        2874.79          54.89
      2128        58.1510        2584.00        2511.32          50.83
      2129        58.1760        2216.00        2141.39          47.07
      2130        58.2010        1727.00        1807.68          41.56
      2131        58.2260        1472.00        1535.32          38.37
      2132        58.2510        1261.00        1329.98          35.51
      2133        58.2760        1141.00        1185.93          33.78
      2134        58.3010        1059.00        1092.13          32.54
      2135        58.3260        1010.00        1035.14          31.78
      2136        58.3510        1017.00        1003.51          31.89
      2137        58.3760         968.00         988.08          31.11
      2138        58.4010         975.00         983.61          31.23
      2139        58.4260         944.00         986.82          30.72
      2140        58.4510         983.00         995.60          31.35
      2141        58.4760        1018.00        1008.09          31.91
      2142        58.5010        1011.00        1022.16          31.80
      2143        58.5260        1040.00        1035.13          32.25
      2144        58.5510        1074.00        1043.96          32.77
      2145        58.5760        1077.00        1046.00          32.82
      2146        58.6010        1094.00        1040.49          33.08
      2147        58.6260        1031.00        1029.10          32.11
      2148        58.6510        1011.00        1012.29          31.80
      2149        58.6760         991.00         994.12          31.48
      2150        58.7010         980.00         977.62          31.31
      2151        58.7260         996.00         962.99          31.56
      2152        58.7510        1007.00         951.63          31.73
      2153        58.7760         950.00         943.59          30.82
      2154        58.8010         966.00         938.47          31.08
      2155        58.8260         960.00         935.70          30.98
      2156        58.8510         911.00         934.72          30.18
      2157        58.8760         938.00         935.17          30.63
      2158        58.9010         973.00         936.94          31.19
      2159        58.9260         939.00         940.25          30.64
      2160        58.9510         946.00         945.70          30.76
      2161        58.9760         991.00         954.31          31.48
      2162        59.0010        1009.00         967.52          31.76
      2163        59.0260        1048.00         986.41          32.37
      2164        59.0510        1069.00        1013.61          32.70
      2165        59.0760        1091.00        1049.47          33.03
      2166        59.1010        1149.00        1093.71          33.90
      2167        59.1260        1196.00        1144.58          34.58
      2168        59.1510        1302.00        1198.93          36.08
      2169        59.1760        1377.00        1252.86          37.11
      2170        59.2010        1387.00        1303.35          37.24
      2171        59.2260        1443.00        1350.95          37.99
      2172        59.2510        1500.00        1402.95          38.73
      2173        59.2760        1527.00        1473.51          39.08
      2174        59.3010        1572.00        1579.75          39.65
      2175        59.3260        1713.00        1736.13          41.39
      2176        59.3510        1916.00        1947.69          43.77
      2177        59.3760        2087.00        2206.35          45.68
      2178        59.4010        2349.00        2490.11          48.47
      2179        59.4260        2632.00        2762.39          51.30
      2180        59.4510        2818.00        2977.88          53.08
      2181        59.4760        2961.00        3090.75          54.42
      2182        59.5010        2983.00        3076.14          54.62
      2183        59.5260        2875.00        2938.21          53.62
      2184        59.5510        2717.00        2708.50          52.12
      2185        59.5760        2461.00        2430.04          49.61
      2186        59.6010        2148.00        2142.16          46.35
      2187        59.6260        1928.00        1873.67          43.91
      2188        59.6510        1711.00        1642.49          41.36
      2189        59.6760        1523.00        1456.60          39.03
      2190        59.7010        1387.00        1316.31          37.24
      2191        59.7260        1311.00        1216.86          36.21
      2192        59.7510        1245.00        1151.48          35.28
      2193        59.7760        1201.00        1114.17          34.66
      2194        59.8010        1184.00        1101.39          34.41
      2195        59.8260        1204.00        1113.26          34.70
      2196        59.8510        1208.00        1154.48          34.76
      2197        59.8760        1288.00        1231.14          35.89
      2198        59.9010        1316.00        1359.45          36.28
      2199        59.9260        1475.00        1550.20          38.41
      2200        59.9510        1702.00        1812.97          41.26
      2201        59.9760        2041.00        2149.29          45.18
      2202        60.0010        2361.00        2546.37          48.59
      2203        60.0260        2893.00        2975.54          53.79
      2204        60.0510        3281.00        3390.99          57.28
      2205        60.0760        3621.00        3732.90          60.17
      2206        60.1010        3938.00        3942.62          62.75
      2207        60.1260        4092.00        3982.36          63.97
      2208        60.1510        3995.00        3853.32          63.21
      2209        60.1760        3797.00        3592.97          61.62
      2210        60.2010        3369.00        3256.88          58.04
      2211        60.2260        2959.00        2900.57          54.40
      2212        60.2510        2649.00        2571.18          51.47
      2213        60.2760        2351.00        2308.75          48.49
      2214        60.3010        2101.00        2143.41          45.84
      2215        60.3260        1932.00        2093.82          43.95
      2216        60.3510        1919.00        2166.45          43.81
      2217        60.3760        2141.00        2354.84          46.27
      2218        60.4010        2474.00        2638.81          49.74
      2219        60.4260        2921.00        2983.63          54.05
      2220        60.4510        3374.00        3340.52          58.09
      2221        60.4760        3920.00        3650.42          62.61
      2222        60.5010        4207.00        3855.23          64.86
      2223        60.5260        4310.00        3916.62          65.65
      2224        60.5510        4288.00        3829.94          65.48
      2225        60.5760        3946.00        3617.49          62.82
      2226        60.6010        3548.00        3312.73          59.57
      2227        60.6260        3114.00        2952.36          55.80
      2228        60.6510        2617.00        2575.04          51.16
      2229        60.6760        2289.00        2215.65          47.84
      2230        60.7010        1894.00        1899.17          43.52
      2231        60.7260        1672.00        1638.34          40.89
      2232        60.7510        1555.00        1435.45          39.43
      2233        60.7760        1301.00        1285.91          36.07
      2234        60.8010        1199.00        1181.11          34.63
      2235        60.8260        1163.00        1111.52          34.10
      2236        60.8510        1154.00        1067.28          33.97
      2237        60.8760        1080.00        1041.15          32.86
      2238        60.9010        1092.00        1027.84          33.05
      2239        60.9260        1103.00        1024.45          33.21
      2240        60.9510        1114.00        1030.48          33.38
      2241        60.9760        1108.00        1047.84          33.29
      2242        61.0010        1118.00        1080.82          33.44
      2243        61.0260        1092.00        1135.96          33.05
      2244        61.0510        1202.00        1221.49          34.67
      2245        61.0760        1271.00        1345.89          35.65
      2246        61.1010        1463.00        1516.92          38.25
      2247        61.1260        1666.00        1737.54          40.82
      2248        61.1510        1995.00        2005.04          44.67
      2249        61.1760        2327.00        2306.59          48.24
      2250        61.2010        2594.00        2620.93          50.93
      2251        61.2260        3028.00        2917.73          55.03
      2252        61.2510        3252.00        3163.01          57.03
      2253        61.2760        3426.00        3328.81          58.53
      2254        61.3010        3560.00        3400.10          59.67
      2255        61.3260        3346.00        3373.97          57.84
      2256        61.3510        3289.00        3255.85          57.35
      2257        61.3760        3037.00        3053.65          55.11
      2258        61.4010        2632.00        2788.25          51.30
      2259        61.4260        2409.00        2487.02          49.08
      2260        61.4510        2166.00        2181.96          46.54
      2261        61.4760        1954.00        1899.52          44.20
      2262        61.5010        1666.00        1657.94          40.82
      2263        61.5260        1508.00        1466.94          38.83
      2264        61.5510        1377.00        1328.90          37.11
      2265        61.5760        1306.00        1241.38          36.14
      2266        61.6010        1268.00        1198.71          35.61
      2267        61.6260        1223.00        1193.80          34.97
      2268        61.6510        1254.00        1219.11          35.41
      2269        61.6760        1350.00        1266.84          36.74
      2270        61.7010        1370.00        1329.34          37.01
      2271        61.7260        1445.00        1398.87          38.01
      2272        61.7510        1536.00        1467.95          39.19
      2273        61.7760        1525.00        1530.67          39.05
      2274        61.8010        1639.00        1585.03          40.48
      2275        61.8260        1605.00        1633.09          40.06
      2276        61.8510        1727.00        1678.62          41.56
      2277        61.8760        1806.00        1723.24          42.50
      2278        61.9010        1905.00        1765.93          43.65
      2279        61.9260        1950.00        1803.93          44.16
      2280        61.9510        1872.00        1834.55          43.27
      2281        61.9760        1911.00        1855.83          43.72
      2282        62.0010        1928.00        1866.36          43.91
      2283        62.0260        1874.00        1870.07          43.29
      2284        62.0510        1822.00        1873.22          42.68
      2285        62.0760        1704.00        1879.20          41.28
      2286        62.1010        1741.00        1887.34          41.73
      2287        62.1260        1706.00        1890.58          41.30
      2288        62.1510        1740.00        1878.52          41.71
      2289        62.1760        1764.00        1840.55          42.00
      2290        62.2010        1685.00        1772.92          41.05
      2291        62.2260        1604.00        1679.85          40.05
      2292        62.2510        1465.00        1570.61          38.28
      2293        62.2760        1431.00        1454.55          37.83
      2294        62.3010        1372.00        1341.45          37.04
      2295        62.3260        1286.00        1239.02          35.86
      2296        62.3510        1204.00        1152.22          34.70
      2297        62.3760        1162.00        1083.01          34.09
      2298        62.4010        1078.00        1030.53          32.83
      2299        62.4260        1035.00         991.95          32.17
      2300        62.4510        1039.00         967.36          32.23
      2301        62.4760        1020.00         952.72          31.94
      2302        62.5010         956.00         946.43          30.92
      2303        62.5260         976.00         947.03          31.24
      2304        62.5510         970.00         956.01          31.14
      2305        62.5760        1014.00         973.45          31.84
      2306        62.6010        1040.00        1000.82          32.25
      2307        62.6260        1069.00        1037.66          32.70
      2308        62.6510        1104.00        1083.76          33.23
      2309        62.6760        1127.00        1136.74          33.57
      2310        62.7010        1225.00        1192.10          35.00
      2311        62.7260        1315.00        1243.80          36.26
      2312        62.7510        1344.00        1283.55          36.66
      2313        62.7760        1365.00        1304.50          36.95
      2314        62.8010        1394.00        1302.83          37.34
      2315        62.8260        1377.00        1280.52          37.11
      2316        62.8510        1316.00        1244.82          36.28
      2317        62.8760        1242.00        1205.55          35.24
      2318        62.9010        1203.00        1172.57          34.68
      2319        62.9260        1195.00        1154.19          34.57
      2320        62.9510        1180.00        1156.25          34.35
      2321        62.9760        1180.00        1181.28          34.35
      2322        63.0010        1162.00        1228.00          34.09
      2323        63.0260        1196.00        1291.17          34.58
      2324        63.0510        1302.00        1361.93          36.08
      2325        63.0760        1387.00        1428.59          37.24
      2326        63.1010        1428.00        1478.02          37.79
      2327        63.1260        1442.00        1498.56          37.97
      2328        63.1510        1440.00        1484.17          37.95
      2329        63.1760        1364.00        1436.67          36.93
      2330        63.2010        1328.00        1365.59          36.44
      2331        63.2260        1287.00        1283.29          35.87
      2332        63.2510        1205.00        1199.72          34.71
      2333        63.2760        1118.00        1123.04          33.44
      2334        63.3010        1042.00        1057.71          32.28
      2335        63.3260        1034.00        1006.72          32.16
      2336        63.3510        1020.00         969.85          31.94
      2337        63.3760         965.00         945.16          31.06
      2338        63.4010         959.00         930.46          30.97
      2339        63.4260         948.00         923.64          30.79
      2340        63.4510         935.00         923.01          30.58
      2341        63.4760         925.00         927.37          30.41
      2342        63.5010         934.00         935.83          30.56
      2343        63.5260         965.00         947.61          31.06
      2344        63.5510         965.00         961.82          31.06
      2345        63.5760         966.00         977.36          31.08
      2346        63.6010        1029.00         992.95          32.08
      2347        63.6260        1046.00        1007.31          32.34
      2348        63.6510        1041.00        1019.82          32.26
      2349        63.6760        1041.00        1030.17          32.26
      2350        63.7010        1100.00        1039.95          33.17
      2351        63.7260        1080.00        1051.09          32.86
      2352        63.7510        1107.00        1066.29          33.27
      2353        63.7760        1133.00        1086.63          33.66
      2354        63.8010        1155.00        1112.43          33.99
      2355        63.8260        1176.00        1142.77          34.29
      2356        63.8510        1230.00        1175.46          35.07
      2357        63.8760        1250.00        1208.35          35.36
      2358        63.9010        1288.00        1238.92          35.89
      2359        63.9260        1292.00        1265.17          35.94
      2360        63.9510        1315.00        1284.54          36.26
      2361        63.9760        1368.00        1295.21          36.99
      2362        64.0010        1279.00        1294.64          35.76
      2363        64.0260        1272.00        1282.97          35.67
      2364        64.0510        1263.00        1263.97          35.54
      2365        64.0760        1236.00        1244.06          35.16
      2366        64.1010        1251.00        1230.39          35.37
      2367        64.1260        1221.00        1227.23          34.94
      2368        64.1510        1222.00        1238.37          34.96
      2369        64.1760        1227.00        1262.36          35.03
      2370        64.2010        1230.00        1294.99          35.07
      2371        64.2260        1302.00        1329.12          36.08
      2372        64.2510        1291.00        1356.44          35.93
      2373        64.2760        1360.00        1369.23          36.88
      2374        64.3010        1399.00        1363.91          37.40
      2375        64.3260        1339.00        1342.76          36.59
      2376        64.3510        1312.00        1312.73          36.22
      2377        64.3760        1262.00        1283.33          35.52
      2378        64.4010        1235.00        1261.43          35.14
      2379        64.4260        1238.00        1254.44          35.19
      2380        64.4510        1191.00        1266.70          34.51
      2381        64.4760        1242.00        1299.95          35.24
      2382        64.5010        1323.00        1353.59          36.37
      2383        64.5260        1367.00        1424.99          36.97
      2384        64.5510        1476.00        1509.60          38.42
      2385        64.5760        1616.00        1600.50          40.20
      2386        64.6010        1721.00        1688.15          41.48
      2387        64.6260        1832.00        1761.28          42.80
      2388        64.6510        1886.00        1809.76          43.43
      2389        64.6760        1977.00        1827.91          44.46
      2390        64.7010        1898.00        1815.42          43.57
      2391        64.7260        1908.00        1774.88          43.68
      2392        64.7510        1764.00        1709.47          42.00
      2393        64.7760        1712.00        1622.81          41.38
      2394        64.8010        1648.00        1522.09          40.60
      2395        64.8260        1399.00        1414.77          37.40
      2396        64.8510        1348.00        1309.62          36.72
      2397        64.8760        1255.00        1213.41          35.43
      2398        64.9010        1169.00        1130.34          34.19
      2399        64.9260        1084.00        1062.36          32.92
      2400        64.9510         945.00        1009.41          30.74
      2401        64.9760        1023.00         970.17          31.98
      2402        65.0010         936.00         942.52          30.59
      2403        65.0260         933.00         924.08          30.55
      2404        65.0510         939.00         912.73          30.64
      2405        65.0760         941.00         907.08          30.68
      2406        65.1010         928.00         905.56          30.46
      2407        65.1260         934.00         907.60          30.56
      2408        65.1510         935.00         914.38          30.58
      2409        65.1760         915.00         925.32          30.25
      2410        65.2010         966.00         940.92          31.08
      2411        65.2260         965.00         961.08          31.06
      2412        65.2510        1014.00         985.11          31.84
      2413        65.2760        1041.00        1011.50          32.26
      2414        65.3010        1073.00        1037.86          32.76
      2415        65.3260        1113.00        1061.16          33.36
      2416        65.3510        1120.00        1078.07          33.47
      2417        65.3760        1146.00        1085.95          33.85
      2418        65.4010        1181.00        1084.83          34.37
      2419        65.4260        1088.00        1075.04          32.98
      2420        65.4510        1099.00        1061.23          33.15
      2421        65.4760        1115.00        1048.30          33.39
      2422        65.5010        1071.00        1040.92          32.73
      2423        65.5260        1087.00        1042.94          32.97
      2424        65.5510        1117.00        1057.28          33.42
      2425        65.5760        1077.00        1083.20          32.82
      2426        65.6010        1091.00        1119.61          33.03
      2427        65.6260        1200.00        1162.69          34.64
      2428        65.6510        1223.00        1206.65          34.97
      2429        65.6760        1249.00        1244.38          35.34
      2430        65.7010        1233.00        1268.80          35.11
      2431        65.7260        1261.00        1274.30          35.51
      2432        65.7510        1298.00        1259.20          36.03
      2433        65.7760        1292.00        1226.29          35.94
      2434        65.8010        1246.00        1181.30          35.30
      2435        65.8260        1178.00        1130.93          34.32
      2436        65.8510        1128.00        1081.24          33.59
      2437        65.8760        1090.00        1037.08          33.02
      2438        65.9010        1039.00        1001.66          32.23
      2439        65.9260        1016.00         977.17          31.87
      2440        65.9510         998.00         964.40          31.59
      2441        65.9760         993.00         963.51          31.51
      2442        66.0010         971.00         974.29          31.16
      2443        66.0260         998.00         995.63          31.59
      2444        66.0510        1011.00        1026.85          31.80
      2445        66.0760         994.00        1065.81          31.53
      2446        66.1010        1078.00        1110.16          32.83
      2447        66.1260        1189.00        1155.73          34.48
      2448        66.1510        1278.00        1199.02          35.75
      2449        66.1760        1323.00        1236.53          36.37
      2450        66.2010        1316.00        1266.60          36.28
      2451        66.2260        1322.00        1290.92          36.36
      2452        66.2510        1309.00        1315.00          36.18
      2453        66.2760        1305.00        1346.58          36.12
      2454        66.3010        1329.00        1392.89          36.46
      2455        66.3260        1395.00        1458.19          37.35
      2456        66.3510        1469.00        1543.41          38.33
      2457        66.3760        1551.00        1643.04          39.38
      2458        66.4010        1630.00        1746.94          40.37
      2459        66.4260        1749.00        1840.23          41.82
      2460        66.4510        1855.00        1905.84          43.07
      2461        66.4760        1890.00        1928.40          43.47
      2462        66.5010        1916.00        1900.15          43.77
      2463        66.5260        1898.00        1824.45          43.57
      2464        66.5510        1786.00        1714.04          42.26
      2465        66.5760        1667.00        1585.14          40.83
      2466        66.6010        1472.00        1453.73          38.37
      2467        66.6260        1287.00        1332.81          35.87
      2468        66.6510        1232.00        1231.80          35.10
      2469        66.6760        1174.00        1156.17          34.26
      2470        66.7010        1118.00        1107.44          33.44
      2471        66.7260        1078.00        1085.84          32.83
      2472        66.7510        1072.00        1088.15          32.74
      2473        66.7760        1124.00        1110.40          33.53
      2474        66.8010        1182.00        1146.95          34.38
      2475        66.8260        1254.00        1191.67          35.41
      2476        66.8510        1359.00        1238.52          36.86
      2477        66.8760        1405.00        1280.32          37.48
      2478        66.9010        1416.00        1311.13          37.63
      2479        66.9260        1425.00        1326.40          37.75
      2480        66.9510        1425.00        1326.52          37.75
      2481        66.9760        1420.00        1316.14          37.68
      2482        67.0010        1371.00        1302.74          37.03
      2483        67.0260        1296.00        1294.26          36.00
      2484        67.0510        1239.00        1297.15          35.20
      2485        67.0760        1214.00        1315.19          34.84
      2486        67.1010        1272.00        1348.92          35.67
      2487        67.1260        1271.00        1395.33          35.65
      2488        67.1510        1366.00        1448.36          36.96
      2489        67.1760        1471.00        1499.94          38.35
      2490        67.2010        1535.00        1542.07          39.18
      2491        67.2260        1524.00        1569.35          39.04
      2492        67.2510        1541.00        1580.50          39.26
      2493        67.2760        1563.00        1578.32          39.53
      2494        67.3010        1587.00        1569.16          39.84
      2495        67.3260        1557.00        1562.51          39.46
      2496        67.3510        1476.00        1569.66          38.42
      2497        67.3760        1454.00        1601.32          38.13
      2498        67.4010        1603.00        1664.69          40.04
      2499        67.4260        1709.00        1762.26          41.34
      2500        67.4510        1854.00        1890.66          43.06
      2501        67.4760        2057.00        2041.09          45.35
      2502        67.5010        2231.00        2198.84          47.23
      2503        67.5260        2449.00        2346.00          49.49
      2504        67.5510        2539.00        2464.57          50.39
      2505        67.5760        2555.00        2542.30          50.55
      2506        67.6010        2574.00        2573.87          50.73
      2507        67.6260        2479.00        2560.93          49.79
      2508        67.6510        2403.00        2506.30          49.02
      2509        67.6760        2299.00        2412.61          47.95
      2510        67.7010        2181.00        2282.46          46.70
      2511        67.7260        2098.00        2123.41          45.80
      2512        67.7510        1936.00        1947.43          44.00
      2513        67.7760        1829.00        1768.35          42.77
      2514        67.8010        1633.00        1598.05          40.41
      2515        67.8260        1509.00        1445.89          38.85
      2516        67.8510        1397.00        1317.06          37.38
      2517        67.8760        1266.00        1213.85          35.58
      2518        67.9010        1172.00        1136.10          34.23
      2519        67.9260        1144.00        1081.97          33.82
      2520        67.9510        1108.00        1049.06          33.29
      2521        67.9760        1052.00        1034.89          32.43
      2522        68.0010        1032.00        1037.56          32.12
      2523        68.0260        1110.00        1055.55          33.32
      2524        68.0510        1116.00        1087.41          33.41
      2525        68.0760        1174.00        1131.40          34.26
      2526        68.1010        1238.00        1184.88          35.19
      2527        68.1260        1245.00        1244.04          35.28
      2528        68.1510        1262.00        1304.19          35.52
      2529        68.1760        1312.00        1358.91          36.22
      2530        68.2010        1364.00        1402.56          36.93
      2531        68.2260        1366.00        1429.46          36.96
      2532        68.2510        1364.00        1435.17          36.93
      2533        68.2760        1350.00        1418.36          36.74
      2534        68.3010        1351.00        1381.53          36.76
      2535        68.3260        1302.00        1331.63          36.08
      2536        68.3510        1268.00        1276.12          35.61
      2537        68.3760        1214.00        1221.98          34.84
      2538        68.4010        1173.00        1174.26          34.25
      2539        68.4260        1099.00        1135.75          33.15
      2540        68.4510        1100.00        1106.79          33.17
      2541        68.4760        1055.00        1085.87          32.48
      2542        68.5010        1036.00        1069.86          32.19
      2543        68.5260         985.00        1055.45          31.38
      2544        68.5510         960.00        1040.00          30.98
      2545        68.5760        1044.00        1022.41          32.31
      2546        68.6010         983.00        1002.41          31.35
      2547        68.6260         998.00         983.01          31.59
      2548        68.6510         994.00         965.39          31.53
      2549        68.6760         987.00         951.61          31.42
      2550        68.7010         888.00         943.59          29.80
      2551        68.7260         918.00         943.01          30.30
      2552        68.7510         898.00         951.26          29.97
      2553        68.7760         919.00         968.96          30.32
      2554        68.8010         970.00         996.47          31.14
      2555        68.8260        1001.00        1033.84          31.64
      2556        68.8510        1032.00        1079.14          32.12
      2557        68.8760        1103.00        1130.85          33.21
      2558        68.9010        1274.00        1186.21          35.69
      2559        68.9260        1282.00        1241.61          35.81
      2560        68.9510        1289.00        1293.15          35.90
      2561        68.9760        1416.00        1337.30          37.63
      2562        69.0010        1360.00        1371.79          36.88
      2563        69.0260        1449.00        1395.24          38.07
      2564        69.0510        1477.00        1406.08          38.43
      2565        69.0760        1511.00        1403.39          38.87
      2566        69.1010        1458.00        1384.63          38.18
      2567        69.1260        1381.00        1349.67          37.16
      2568        69.1510        1305.00        1300.74          36.12
      2569        69.1760        1314.00        1242.38          36.25
      2570        69.2010        1280.00        1180.00          35.78
      2571        69.2260        1190.00        1118.75          34.50
      2572        69.2510        1064.00        1062.70          32.62
      2573        69.2760         999.00        1014.77          31.61
      2574        69.3010         954.00         976.62          30.89
      2575        69.3260         938.00         948.91          30.63
      2576        69.3510         932.00         931.19          30.53
      2577        69.3760         915.00         923.34          30.25
      2578        69.4010         964.00         924.12          31.05
      2579        69.4260         940.00         932.26          30.66
      2580        69.4510         930.00         947.20          30.50
      2581        69.4760        1009.00         967.76          31.76
      2582        69.5010        1044.00         993.11          32.31
      2583        69.5260        1029.00        1022.72          32.08
      2584        69.5510        1068.00        1055.96          32.68
      2585        69.5760        1086.00        1092.97          32.95
      2586        69.6010        1110.00        1134.47          33.32
      2587        69.6260        1136.00        1181.97          33.70
      2588        69.6510        1136.00        1237.33          33.70
      2589        69.6760        1168.00        1301.87          34.18
      2590        69.7010        1194.00        1374.86          34.55
      2591        69.7260        1225.00        1456.06          35.00
      2592        69.7510        1284.00        1540.64          35.83
      2593        69.7760        1370.00        1622.60          37.01
      2594        69.8010        1425.00        1694.73          37.75
      2595        69.8260        1503.00        1750.55          38.77
      2596        69.8510        1521.00        1784.59          39.00
      2597        69.8760        1606.00        1795.04          40.07
      2598        69.9010        1663.00        1779.31          40.78
      2599        69.9260        1687.00        1737.38          41.07
      2600        69.9510        1652.00        1672.45          40.64
      2601        69.9760        1601.00        1591.24          40.01
      2602        70.0010        1481.00        1502.48          38.48
      2603        70.0260        1378.00        1414.64          37.12
      2604        70.0510        1332.00        1334.66          36.50
      2605        70.0760        1300.00        1267.26          36.06
      2606        70.1010        1216.00        1215.35          34.87
      2607        70.1260        1171.00        1180.17          34.22
      2608        70.1510        1161.00        1161.63          34.07
      2609        70.1760        1170.00        1158.73          34.21
      2610        70.2010        1183.00        1170.03          34.39
      2611        70.2260        1161.00        1193.88          34.07
      2612        70.2510        1199.00        1228.23          34.63
      2613        70.2760        1277.00        1270.09          35.74
      2614        70.3010        1354.00        1315.29          36.80
      2615        70.3260        1402.00        1358.34          37.44
      2616        70.3510        1435.00        1393.06          37.88
      2617        70.3760        1461.00        1413.36          38.22
      2618        70.4010        1447.00        1415.30          38.04
      2619        70.4260        1432.00        1398.06          37.84
      2620        70.4510        1389.00        1364.20          37.27
      2621        70.4760        1329.00        1319.06          36.46
      2622        70.5010        1245.00        1267.29          35.28
      2623        70.5260        1180.00        1213.57          34.35
      2624        70.5510        1144.00        1161.94          33.82
      2625        70.5760        1093.00        1115.68          33.06
      2626        70.6010        1079.00        1077.12          32.85
      2627        70.6260        1094.00        1046.82          33.08
      2628        70.6510        1112.00        1024.67          33.35
      2629        70.6760        1120.00        1009.57          33.47
      2630        70.7010        1118.00        1000.07          33.44
      2631        70.7260        1063.00         994.78          32.60
      2632        70.7510        1032.00         993.43          32.12
      2633        70.7760        1034.00         996.55          32.16
      2634        70.8010        1020.00        1005.88          31.94
      2635        70.8260        1022.00        1023.77          31.97
      2636        70.8510        1026.00        1052.56          32.03
      2637        70.8760        1005.00        1093.95          31.70
      2638        70.9010        1048.00        1148.41          32.37
      2639        70.9260        1127.00        1214.64          33.57
      2640        70.9510        1191.00        1289.39          34.51
      2641        70.9760        1258.00        1367.30          35.47
      2642        71.0010        1329.00        1441.38          36.46
      2643        71.0260        1432.00        1504.00          37.84
      2644        71.0510        1524.00        1548.02          39.04
      2645        71.0760        1542.00        1568.42          39.27
      2646        71.1010        1533.00        1563.61          39.15
      2647        71.1260        1532.00        1536.56          39.14
      2648        71.1510        1456.00        1494.10          38.16
      2649        71.1760        1355.00        1444.54          36.81
      2650        71.2010        1302.00        1396.06          36.08
      2651        71.2260        1239.00        1354.08          35.20
      2652        71.2510        1242.00        1321.31          35.24
      2653        71.2760        1241.00        1297.70          35.23
      2654        71.3010        1259.00        1279.81          35.48
      2655        71.3260        1275.00        1262.92          35.71
      2656        71.3510        1291.00        1242.60          35.93
      2657        71.3760        1296.00        1215.01          36.00
      2658        71.4010        1238.00        1179.26          35.19
      2659        71.4260        1175.00        1136.81          34.28
      2660        71.4510        1143.00        1090.64          33.81
      2661        71.4760        1064.00        1044.21          32.62
      2662        71.5010        1006.00        1000.65          31.72
      2663        71.5260         983.00         962.54          31.35
      2664        71.5510         953.00         931.66          30.87
      2665        71.5760         878.00         908.91          29.63
      2666        71.6010         848.00         894.50          29.12
      2667        71.6260         818.00         888.12          28.60
      2668        71.6510         858.00         888.57          29.29
      2669        71.6760         867.00         894.68          29.44
      2670        71.7010         868.00         904.88          29.46
      2671        71.7260         887.00         917.37          29.78
      2672        71.7510         912.00         930.20          30.20
      2673        71.7760         968.00         941.24          31.11
      2674        71.8010         992.00         948.55          31.50
      2675        71.8260        1001.00         950.53          31.64
      2676        71.8510        1009.00         946.71          31.76
      2677        71.8760         953.00         937.65          30.87
      2678        71.9010         911.00         924.29          30.18
      2679        71.9260         933.00         908.53          30.55
      2680        71.9510         916.00         892.17          30.27
      2681        71.9760         860.00         876.70          29.33
      2682        72.0010         847.00         863.32          29.10
      2683        72.0260         822.00         852.82          28.67
      2684        72.0510         860.00         845.31          29.33
      2685        72.0760         839.00         841.46          28.97
      2686        72.1010         799.00         840.70          28.27
      2687        72.1260         821.00         842.52          28.65
      2688        72.1510         791.00         846.23          28.12
      2689        72.1760         843.00         850.60          29.03
      2690        72.2010         815.00         855.56          28.55
      2691        72.2260         847.00         859.76          29.10
      2692        72.2510         850.00         862.38          29.15
      2693        72.2760         855.00         862.84          29.24
      2694        72.3010         870.00         861.06          29.50
      2695        72.3260         854.00         857.11          29.22
      2696        72.3510         831.00         851.81          28.83
      2697        72.3760         908.00         846.00          30.13
      2698        72.4010         854.00         840.57          29.22
      2699        72.4260         853.00         836.41          29.21
      2700        72.4510         834.00         834.24          28.88
      2701        72.4760         777.00         834.96          27.87
      2702        72.5010         838.00         839.11          28.95
      2703        72.5260         813.00         847.17          28.51
      2704        72.5510         791.00         859.41          28.12
      2705        72.5760         855.00         875.84          29.24
      2706        72.6010         872.00         896.15          29.53
      2707        72.6260         905.00         919.69          30.08
      2708        72.6510         946.00         945.26          30.76
      2709        72.6760         941.00         971.93          30.68
      2710        72.7010        1043.00         997.98          32.30
      2711        72.7260        1089.00        1021.83          33.00
      2712        72.7510        1076.00        1042.24          32.80
      2713        72.7760        1087.00        1058.69          32.97
      2714        72.8010        1070.00        1071.39          32.71
      2715        72.8260        1149.00        1081.11          33.90
      2716        72.8510        1138.00        1088.22          33.73
      2717        72.8760        1147.00        1092.43          33.87
      2718        72.9010        1144.00        1092.85          33.82
      2719        72.9260        1093.00        1088.08          33.06
      2720        72.9510        1044.00        1076.83          32.31
      2721        72.9760        1090.00        1058.62          33.02
      2722        73.0010        1049.00        1034.22          32.39
      2723        73.0260        1031.00        1005.35          32.11
      2724        73.0510         975.00         974.40          31.23
      2725        73.0760         915.00         943.47          30.25
      2726        73.1010         889.00         914.37          29.82
      2727        73.1260         898.00         888.45          29.97
      2728        73.1510         868.00         866.60          29.46
      2729        73.1760         839.00         848.91          28.97
      2730        73.2010         844.00         835.40          29.05
      2731        73.2260         829.00         825.73          28.79
      2732        73.2510         805.00         819.51          28.37
      2733        73.2760         808.00         816.43          28.43
      2734        73.3010         827.00         816.31          28.76
      2735        73.3260         798.00         819.55          28.25
      2736        73.3510         792.00         826.56          28.14
      2737        73.3760         792.00         837.67          28.14
      2738        73.4010         830.00         854.60          28.81
      2739        73.4260         854.00         877.80          29.22
      2740        73.4510         847.00         907.88          29.10
      2741        73.4760         921.00         944.92          30.35
      2742        73.5010         924.00         988.19          30.40
      2743        73.5260         969.00        1036.08          31.13
      2744        73.5510        1044.00        1085.89          32.31
      2745        73.5760        1098.00        1134.10          33.14
      2746        73.6010        1162.00        1176.38          34.09
      2747        73.6260        1211.00        1208.35          34.80
      2748        73.6510        1263.00        1226.17          35.54
      2749        73.6760        1250.00        1228.70          35.36
      2750        73.7010        1213.00        1216.68          34.83
      2751        73.7260        1234.00        1193.28          35.13
      2752        73.7510        1221.00        1162.81          34.94
      2753        73.7760        1098.00        1129.78          33.14
      2754        73.8010        1058.00        1098.31          32.53
      2755        73.8260        1067.00        1071.96          32.67
      2756        73.8510        1030.00        1052.86          32.09
      2757        73.8760         988.00        1042.12          31.43
      2758        73.9010        1025.00        1039.69          32.02
      2759        73.9260        1002.00        1044.33          31.65
      2760        73.9510         990.00        1054.00          31.46
      2761        73.9760        1051.00        1066.29          32.42
      2762        74.0010        1068.00        1078.94          32.68
      2763        74.0260        1055.00        1090.43          32.48
      2764        74.0510        1047.00        1100.38          32.36
      2765        74.0760        1053.00        1109.30          32.45
      2766        74.1010        1057.00        1118.02          32.51
      2767        74.1260        1106.00        1127.01          33.26
      2768        74.1510        1135.00        1135.91          33.69
      2769        74.1760        1148.00        1143.88          33.88
      2770        74.2010        1212.00        1149.06          34.81
      2771        74.2260        1183.00        1149.27          34.39
      2772        74.2510        1178.00        1142.30          34.32
      2773        74.2760        1188.00        1126.72          34.47
      2774        74.3010        1166.00        1102.56          34.15
      2775        74.3260        1140.00        1071.46          33.76
      2776        74.3510        1110.00        1036.12          33.32
      2777        74.3760        1057.00         999.68          32.51
      2778        74.4010         999.00         965.09          31.61
      2779        74.4260         971.00         934.82          31.16
      2780        74.4510         918.00         910.83          30.30
      2781        74.4760         901.00         894.41          30.02
      2782        74.5010         913.00         885.93          30.22
      2783        74.5260         869.00         885.27          29.48
      2784        74.5510         890.00         891.60          29.83
      2785        74.5760         927.00         903.51          30.45
      2786        74.6010         943.00         919.12          30.71
      2787        74.6260         947.00         936.29          30.77
      2788        74.6510         973.00         952.62          31.19
      2789        74.6760        1022.00         965.73          31.97
      2790        74.7010        1060.00         973.68          32.56
      2791        74.7260        1070.00         975.32          32.71
      2792        74.7510        1062.00         970.73          32.59
      2793        74.7760        1035.00         961.23          32.17
      2794        74.8010         992.00         949.16          31.50
      2795        74.8260         983.00         936.71          31.35
      2796        74.8510         955.00         926.36          30.90
      2797        74.8760         906.00         919.98          30.10
      2798        74.9010         893.00         918.75          29.88
      2799        74.9260         885.00         923.03          29.75
      2800        74.9510         876.00         932.34          29.60
      2801        74.9760         878.00         945.39          29.63
      2802        75.0010         900.00         960.39          30.00
      2803        75.0260         898.00         974.74          29.97
      2804        75.0510         912.00         986.13          30.20
      2805        75.0760         954.00         992.47          30.89
      2806        75.1010         946.00         992.47          30.76
      2807        75.1260         953.00         986.53          30.87
      2808        75.1510         977.00         975.40          31.26
      2809        75.1760         953.00         960.84          30.87
      2810        75.2010         932.00         944.54          30.53
      2811        75.2260         931.00         927.97          30.51
      2812        75.2510         914.00         912.24          30.23
      2813        75.2760         921.00         898.10          30.35
      2814        75.3010         923.00         886.09          30.38
      2815        75.3260         885.00         876.51          29.75
      2816        75.3510         880.00         870.36          29.66
      2817        75.3760         875.00         867.54          29.58
      2818        75.4010         876.00         868.58          29.60
      2819        75.4260         868.00         873.56          29.46
      2820        75.4510         875.00         882.20          29.58
      2821        75.4760         886.00         893.82          29.77
      2822        75.5010         911.00         907.29          30.18
      2823        75.5260         925.00         921.11          30.41
      2824        75.5510         964.00         933.46          31.05
      2825        75.5760         916.00         942.47          30.27
      2826        75.6010         976.00         946.44          31.24
      2827        75.6260         991.00         944.29          31.48
      2828        75.6510        1007.00         935.88          31.73
      2829        75.6760         912.00         922.05          30.20
      2830        75.7010         905.00         904.29          30.08
      2831        75.7260         844.00         884.31          29.05
      2832        75.7510         891.00         863.79          29.85
      2833        75.7760         898.00         844.13          29.97
      2834        75.8010         812.00         826.40          28.50
      2835        75.8260         869.00         811.27          29.48
      2836        75.8510         850.00         799.10          29.15
      2837        75.8760         799.00         790.04          28.27
      2838        75.9010         759.00         784.04          27.55
      2839        75.9260         750.00         781.09          27.39
      2840        75.9510         737.00         781.21          27.15
      2841        75.9760         788.00         784.64          28.07
      2842        76.0010         745.00         791.77          27.29
      2843        76.0260         794.00         803.19          28.18
      2844        76.0510         813.00         819.28          28.51
      2845        76.0760         836.00         841.24          28.91
      2846        76.1010         847.00         869.15          29.10
      2847        76.1260         851.00         902.98          29.17
      2848        76.1510         891.00         942.19          29.85
      2849        76.1760         912.00         985.03          30.20
      2850        76.2010         982.00        1029.53          31.34
      2851        76.2260         973.00        1072.61          31.19
      2852        76.2510        1049.00        1110.74          32.39
      2853        76.2760        1055.00        1140.16          32.48
      2854        76.3010        1076.00        1157.61          32.80
      2855        76.3260        1132.00        1161.06          33.65
      2856        76.3510        1137.00        1150.33          33.72
      2857        76.3760        1096.00        1127.08          33.11
      2858        76.4010        1110.00        1094.35          33.32
      2859        76.4260        1016.00        1055.57          31.87
      2860        76.4510         964.00        1014.49          31.05
      2861        76.4760         940.00         973.90          30.66
      2862        76.5010         944.00         935.99          30.72
      2863        76.5260         934.00         902.19          30.56
      2864        76.5510         860.00         873.25          29.33
      2865        76.5760         847.00         849.31          29.10
      2866        76.6010         849.00         830.37          29.14
      2867        76.6260         871.00         816.17          29.51
      2868        76.6510         819.00         806.37          28.62
      2869        76.6760         774.00         800.49          27.82
      2870        76.7010         783.00         798.64          27.98
      2871        76.7260         816.00         800.42          28.57
      2872        76.7510         801.00         805.63          28.30
      2873        76.7760         817.00         814.03          28.58
      2874        76.8010         795.00         825.15          28.20
      2875        76.8260         813.00         838.44          28.51
      2876        76.8510         830.00         853.12          28.81
      2877        76.8760         855.00         868.27          29.24
      2878        76.9010         871.00         882.65          29.51
      2879        76.9260         845.00         895.21          29.07
      2880        76.9510         851.00         904.99          29.17
      2881        76.9760         873.00         911.45          29.55
      2882        77.0010         852.00         913.99          29.19
      2883        77.0260         872.00         913.09          29.53
      2884        77.0510         897.00         909.83          29.95
      2885        77.0760         849.00         905.91          29.14
      2886        77.1010         858.00         902.92          29.29
      2887        77.1260         879.00         902.32          29.65
      2888        77.1510         835.00         905.30          28.90
      2889        77.1760         849.00         912.68          29.14
      2890        77.2010         873.00         924.37          29.55
      2891        77.2260         916.00         939.79          30.27
      2892        77.2510         905.00         957.76          30.08
      2893        77.2760         875.00         976.84          29.58
      2894        77.3010         928.00         995.33          30.46
      2895        77.3260         983.00        1011.81          31.35
      2896        77.3510        1007.00        1025.39          31.73
      2897        77.3760        1016.00        1036.08          31.87
      2898        77.4010        1032.00        1044.60          32.12
      2899        77.4260         985.00        1052.01          31.38
      2900        77.4510        1016.00        1059.25          31.87
      2901        77.4760        1050.00        1066.82          32.40
      2902        77.5010        1102.00        1074.66          33.20
      2903        77.5260        1085.00        1082.11          32.94
      2904        77.5510        1050.00        1088.73          32.40
      2905        77.5760        1078.00        1093.86          32.83
      2906        77.6010        1070.00        1097.33          32.71
      2907        77.6260        1040.00        1099.41          32.25
      2908        77.6510        1035.00        1100.29          32.17
      2909        77.6760        1057.00        1100.60          32.51
      2910        77.7010        1072.00        1101.05          32.74
      2911        77.7260        1082.00        1102.38          32.89
      2912        77.7510        1127.00        1105.16          33.57
      2913        77.7760        1138.00        1109.07          33.73
      2914        77.8010        1148.00        1113.25          33.88
      2915        77.8260        1185.00        1116.08          34.42
      2916        77.8510        1199.00        1115.17          34.63
      2917        77.8760        1224.00        1108.36          34.99
      2918        77.9010        1250.00        1094.02          35.36
      2919        77.9260        1235.00        1071.81          35.14
      2920        77.9510        1201.00        1042.71          34.66
      2921        77.9760        1115.00        1008.89          33.39
      2922        78.0010        1065.00         972.35          32.63
      2923        78.0260        1008.00         935.60          31.75
      2924        78.0510         949.00         900.65          30.81
      2925        78.0760         899.00         869.01          29.98
      2926        78.1010         852.00         841.56          29.19
      2927        78.1260         864.00         818.96          29.39
      2928        78.1510         850.00         801.05          29.15
      2929        78.1760         853.00         787.41          29.21
      2930        78.2010         826.00         777.36          28.74
      2931        78.2260         777.00         770.15          27.87
      2932        78.2510         796.00         765.03          28.21
      2933        78.2760         803.00         761.39          28.34
      2934        78.3010         803.00         758.81          28.34
      2935        78.3260         777.00         757.12          27.87
      2936        78.3510         771.00         756.35          27.77
      2937        78.3760         796.00         756.70          28.21
      2938        78.4010         795.00         758.52          28.20
      2939        78.4260         792.00         762.23          28.14
      2940        78.4510         784.00         768.29          28.00
      2941        78.4760         792.00         777.19          28.14
      2942        78.5010         780.00         789.04          27.93
      2943        78.5260         824.00         804.01          28.71
      2944        78.5510         851.00         821.88          29.17
      2945        78.5760         842.00         842.11          29.02
      2946        78.6010         877.00         863.74          29.61
      2947        78.6260         910.00         885.47          30.17
      2948        78.6510         934.00         905.69          30.56
      2949        78.6760         981.00         922.60          31.32
      2950        78.7010         990.00         934.51          31.46
      2951        78.7260         999.00         939.91          31.61
      2952        78.7510        1034.00         938.24          32.16
      2953        78.7760        1018.00         929.87          31.91
      2954        78.8010         960.00         915.91          30.98
      2955        78.8260         954.00         898.50          30.89
      2956        78.8510         920.00         879.34          30.33
      2957        78.8760         894.00         860.47          29.90
      2958        78.9010         885.00         843.35          29.75
      2959        78.9260         873.00         829.13          29.55
      2960        78.9510         851.00         818.51          29.17
      2961        78.9760         875.00         811.76          29.58
      2962        79.0010         868.00         808.73          29.46
      2963        79.0260         887.00         808.98          29.78
      2964        79.0510         827.00         811.81          28.76
      2965        79.0760         920.00         816.50          30.33
      2966        79.1010         922.00         822.29          30.36
      2967        79.1260         927.00         828.66          30.45
      2968        79.1510         956.00         835.33          30.92
      2969        79.1760         962.00         842.52          31.02
      2970        79.2010         889.00         850.86          29.82
      2971        79.2260         948.00         861.34          30.79
      2972        79.2510         962.00         875.01          31.02
      2973        79.2760         912.00         892.96          30.20
      2974        79.3010         923.00         916.01          30.38
      2975        79.3260         939.00         944.78          30.64
      2976        79.3510         960.00         979.45          30.98
      2977        79.3760         970.00        1019.80          31.14
      2978        79.4010        1017.00        1065.18          31.89
      2979        79.4260        1080.00        1114.54          32.86
      2980        79.4510        1130.00        1166.66          33.62
      2981        79.4760        1146.00        1219.64          33.85
      2982        79.5010        1209.00        1271.43          34.77
      2983        79.5260        1288.00        1319.58          35.89
      2984        79.5510        1320.00        1361.69          36.33
      2985        79.5760        1356.00        1395.16          36.82
      2986        79.6010        1455.00        1417.82          38.14
      2987        79.6260        1433.00        1428.13          37.85
      2988        79.6510        1475.00        1425.34          38.41
      2989        79.6760        1455.00        1409.33          38.14
      2990        79.7010        1451.00        1380.45          38.09
      2991        79.7260        1390.00        1339.89          37.28
      2992        79.7510        1391.00        1289.67          37.30
      2993        79.7760        1266.00        1232.68          35.58
      2994        79.8010        1179.00        1172.14          34.34
      2995        79.8260        1151.00        1111.10          33.93
      2996        79.8510        1038.00        1052.30          32.22
      2997        79.8760         974.00         997.75          31.21
      2998        79.9010         977.00         949.27          31.26
      2999        79.9260         902.00         907.86          30.03
      3000        79.9510         906.00         874.17          30.10
      3001        79.9760         865.00         848.55          29.41
      3002        80.0010         814.00         830.95          28.53
      3003        80.0260         847.00         821.24          29.10
      3004        80.0510         819.00         819.16          28.62
      3005        80.0760         792.00         824.37          28.14
      3006        80.1010         818.00         836.38          28.60
      3007        80.1260         844.00         854.95          29.05
      3008        80.1510         879.00         879.35          29.65
      3009        80.1760         845.00         908.78          29.07
      3010        80.2010         874.00         942.20          29.56
      3011        80.2260         919.00         978.23          30.32
      3012        80.2510         993.00        1015.54          31.51
      3013        80.2760         993.00        1052.39          31.51
      3014        80.3010        1020.00        1087.29          31.94
      3015        80.3260        1086.00        1119.05          32.95
      3016        80.3510        1122.00        1146.83          33.50
      3017        80.3760        1157.00        1170.05          34.01
      3018        80.4010        1262.00        1188.37          35.52
      3019        80.4260        1206.00        1201.72          34.73
      3020        80.4510        1214.00        1210.19          34.84
      3021        80.4760        1222.00        1214.46          34.96
      3022        80.5010        1229.00        1214.79          35.06
      3023        80.5260        1130.00        1211.46          33.62
      3024        80.5510        1184.00        1204.55          34.41
      3025        80.5760        1134.00        1193.75          33.67
      3026        80.6010        1163.00        1178.49          34.10
      3027        80.6260        1129.00        1158.01          33.60
      3028        80.6510        1118.00        1131.74          33.44
      3029        80.6760        1132.00        1099.80          33.65
      3030        80.7010        1078.00        1063.10          32.83
      3031        80.7260        1060.00        1023.31          32.56
      3032        80.7510         985.00         982.43          31.38
      3033        80.7760         922.00         942.43          30.36
      3034        80.8010         928.00         905.11          30.46
      3035        80.8260         866.00         871.86          29.43
      3036        80.8510         887.00         843.88          29.78
      3037        80.8760         805.00         821.70          28.37
      3038        80.9010         806.00         805.73          28.39
      3039        80.9260         771.00         795.96          27.77
      3040        80.9510         819.00         792.09          28.62
      3041        80.9760         782.00         793.66          27.96
      3042        81.0010         806.00         799.77          28.39
      3043        81.0260         778.00         809.59          27.89
      3044        81.0510         801.00         822.10          28.30
      3045        81.0760         848.00         836.17          29.12
      3046        81.1010         865.00         850.62          29.41
      3047        81.1260         869.00         864.26          29.48
      3048        81.1510         873.00         875.96          29.55
      3049        81.1760         868.00         884.86          29.46
      3050        81.2010         856.00         890.51          29.26
      3051        81.2260         878.00         892.92          29.63
      3052        81.2510         876.00         892.50          29.60
      3053        81.2760         886.00         889.88          29.77
      3054        81.3010         929.00         885.44          30.48
      3055        81.3260         916.00         879.59          30.27
      3056        81.3510         921.00         872.36          30.35
      3057        81.3760         886.00         863.97          29.77
      3058        81.4010         832.00         854.23          28.84
      3059        81.4260         836.00         843.17          28.91
      3060        81.4510         854.00         831.05          29.22
      3061        81.4760         820.00         818.21          28.64
      3062        81.5010         778.00         805.15          27.89
      3063        81.5260         784.00         792.40          28.00
      3064        81.5510         771.00         780.44          27.77
      3065        81.5760         761.00         769.72          27.59
      3066        81.6010         765.00         760.59          27.66
      3067        81.6260         752.00         753.27          27.42
      3068        81.6510         781.00         747.88          27.95
      3069        81.6760         769.00         744.48          27.73
      3070        81.7010         719.00         742.71          26.81
      3071        81.7260         734.00         742.43          27.09
      3072        81.7510         730.00         743.35          27.02
      3073        81.7760         734.00         745.10          27.09
      3074        81.8010         737.00         747.50          27.15
      3075        81.8260         732.00         750.26          27.06
      3076        81.8510         754.00         753.29          27.46
      3077        81.8760         759.00         756.68          27.55
      3078        81.9010         731.00         760.66          27.04
      3079        81.9260         729.00         765.60          27.00
      3080        81.9510         743.00         771.91          27.26
      3081        81.9760         773.00         779.94          27.80
      3082        82.0010         783.00         789.96          27.98
      3083        82.0260         801.00         801.87          28.30
      3084        82.0510         834.00         815.48          28.88
      3085        82.0760         877.00         830.51          29.61
      3086        82.1010         874.00         846.31          29.56
      3087        82.1260         862.00         862.01          29.36
      3088        82.1510         874.00         876.64          29.56
      3089        82.1760         892.00         889.57          29.87
      3090        82.2010         917.00         900.16          30.28
      3091        82.2260         962.00         908.02          31.02
      3092        82.2510         938.00         913.68          30.63
      3093        82.2760         925.00         917.29          30.41
      3094        82.3010         955.00         919.40          30.90
      3095        82.3260         966.00         920.51          31.08
      3096        82.3510         933.00         920.95          30.55
      3097        82.3760         961.00         921.22          31.00
      3098        82.4010         971.00         921.64          31.16
      3099        82.4260         972.00         922.20          31.18
      3100        82.4510         966.00         922.94          31.08
      3101        82.4760         957.00         923.85          30.94
      3102        82.5010         964.00         924.82          31.05
      3103        82.5260         946.00         925.70          30.76
      3104        82.5510         949.00         926.18          30.81
      3105        82.5760         995.00         925.85          31.54
      3106        82.6010         971.00         924.20          31.16
      3107        82.6260         926.00         920.67          30.43
      3108        82.6510         964.00         914.76          31.05
      3109        82.6760         954.00         906.16          30.89
      3110        82.7010         903.00         894.76          30.05
      3111        82.7260         871.00         880.84          29.51
      3112        82.7510         887.00         864.91          29.78
      3113        82.7760         854.00         847.68          29.22
      3114        82.8010         845.00         829.99          29.07
      3115        82.8260         836.00         812.72          28.91
      3116        82.8510         802.00         796.71          28.32
      3117        82.8760         817.00         782.74          28.58
      3118        82.9010         777.00         771.41          27.87
      3119        82.9260         782.00         763.20          27.96
      3120        82.9510         770.00         758.38          27.75
      3121        82.9760         766.00         757.00          27.68
      3122        83.0010         769.00         759.19          27.73
      3123        83.0260         758.00         764.62          27.53
      3124        83.0510         788.00         772.87          28.07
      3125        83.0760         777.00         783.23          27.87
      3126        83.1010         836.00         795.21          28.91
      3127        83.1260         820.00         807.77          28.64
      3128        83.1510         800.00         819.94          28.28
      3129        83.1760         858.00         830.60          29.29
      3130        83.2010         863.00         838.98          29.38
      3131        83.2260         840.00         844.29          28.98
      3132        83.2510         853.00         846.23          29.21
      3133        83.2760         830.00         844.95          28.81
      3134        83.3010         864.00         841.03          29.39
      3135        83.3260         857.00         835.36          29.27
      3136        83.3510         865.00         828.85          29.41
      3137        83.3760         848.00         822.97          29.12
      3138        83.4010         817.00         818.59          28.58
      3139        83.4260         843.00         816.68          29.03
      3140        83.4510         778.00         817.92          27.89
      3141        83.4760         814.00         822.71          28.53
      3142        83.5010         852.00         831.11          29.19
      3143        83.5260         859.00         842.78          29.31
      3144        83.5510         883.00         857.06          29.72
      3145        83.5760         826.00         873.02          28.74
      3146        83.6010         839.00         889.44          28.97
      3147        83.6260         908.00         904.84          30.13
      3148        83.6510         921.00         918.02          30.35
      3149        83.6760         931.00         927.95          30.51
      3150        83.7010         898.00         933.92          29.97
      3151        83.7260         947.00         935.54          30.77
      3152        83.7510         921.00         932.72          30.35
      3153        83.7760         958.00         925.68          30.95
      3154        83.8010         936.00         915.04          30.59
      3155        83.8260         850.00         901.70          29.15
      3156        83.8510         858.00         886.89          29.29
      3157        83.8760         868.00         871.91          29.46
      3158        83.9010         831.00         857.83          28.83
      3159        83.9260         849.00         845.73          29.14
      3160        83.9510         854.00         836.06          29.22
      3161        83.9760         882.00         829.05          29.70
      3162        84.0010         851.00         824.60          29.17
      3163        84.0260         862.00         822.31          29.36
      3164        84.0510         847.00         821.57          29.10
      3165        84.0760         921.00         821.68          30.35
      3166        84.1010         881.00         821.98          29.68
      3167        84.1260         913.00         821.92          30.22
      3168        84.1510         888.00         821.47          29.80
      3169        84.1760         854.00         820.68          29.22
      3170        84.2010         873.00         819.92          29.55
      3171        84.2260         859.00         819.67          29.31
      3172        84.2510         843.00         820.42          29.03
      3173        84.2760         783.00         822.61          27.98
      3174        84.3010         855.00         826.57          29.24
      3175        84.3260         817.00         832.59          28.58
      3176        84.3510         863.00         840.48          29.38
      3177        84.3760         806.00         850.14          28.39
      3178        84.4010         879.00         861.13          29.65
      3179        84.4260         836.00         872.76          28.91
      3180        84.4510         849.00         884.15          29.14
      3181        84.4760         853.00         894.29          29.21
      3182        84.5010         901.00         902.23          30.02
      3183        84.5260         883.00         907.24          29.72
      3184        84.5510         896.00         909.02          29.93
      3185        84.5760         893.00         907.84          29.88
      3186        84.6010         900.00         904.44          30.00
      3187        84.6260         874.00         899.96          29.56
      3188        84.6510         846.00         895.53          29.09
      3189        84.6760         863.00         892.22          29.38
      3190        84.7010         891.00         890.84          29.85
      3191        84.7260         882.00         891.87          29.70
      3192        84.7510         824.00         895.40          28.71
      3193        84.7760         847.00         901.11          29.10
      3194        84.8010         878.00         908.27          29.63
      3195        84.8260         921.00         915.86          30.35
      3196        84.8510         936.00         922.71          30.59
      3197        84.8760         903.00         927.68          30.05
      3198        84.9010         918.00         929.84          30.30
      3199        84.9260         887.00         928.46          29.78
      3200        84.9510         885.00         923.03          29.75
      3201        84.9760         886.00         913.53          29.77
      3202        85.0010         869.00         900.05          29.48
      3203        85.0260         849.00         883.14          29.14
      3204        85.0510         840.00         863.64          28.98
      3205        85.0760         816.00         842.75          28.57
      3206        85.1010         821.00         821.48          28.65
      3207        85.1260         791.00         800.72          28.12
      3208        85.1510         757.00         781.38          27.51
      3209        85.1760         731.00         764.08          27.04
      3210        85.2010         722.00         749.24          26.87
      3211        85.2260         728.00         737.20          26.98
      3212        85.2510         715.00         728.00          26.74
      3213        85.2760         709.00         721.60          26.63
      3214        85.3010         721.00         717.84          26.85
      3215        85.3260         714.00         716.54          26.72
      3216        85.3510         714.00         717.39          26.72
      3217        85.3760         723.00         720.09          26.89
      3218        85.4010         691.00         724.13          26.29
      3219        85.4260         692.00         729.07          26.31
      3220        85.4510         738.00         734.53          27.17
      3221        85.4760         733.00         740.00          27.07
      3222        85.5010         752.00         744.93          27.42
      3223        85.5260         737.00         748.82          27.15
      3224        85.5510         700.00         751.31          26.46
      3225        85.5760         728.00         752.09          26.98
      3226        85.6010         742.00         751.07          27.24
      3227        85.6260         743.00         748.38          27.26
      3228        85.6510         735.00         744.30          27.11
      3229        85.6760         712.00         739.21          26.68
      3230        85.7010         709.00         733.50          26.63
      3231        85.7260         695.00         727.55          26.36
      3232        85.7510         697.00         721.65          26.40
      3233        85.7760         716.00         716.05          26.76
      3234        85.8010         711.00         710.94          26.66
      3235        85.8260         740.00         706.47          27.20
      3236        85.8510         734.00         702.61          27.09
      3237        85.8760         720.00         699.40          26.83
      3238        85.9010         723.00         696.82          26.89
      3239        85.9260         723.00         694.84          26.89
      3240        85.9510         742.00         693.60          27.24
      3241        85.9760         718.00         692.80          26.80
      3242        86.0010         710.00         692.60          26.65
      3243        86.0260         712.00         693.04          26.68
      3244        86.0510         699.00         694.27          26.44
      3245        86.0760         729.00         696.38          27.00
      3246        86.1010         714.00         699.49          26.72
      3247        86.1260         718.00         703.78          26.80
      3248        86.1510         729.00         709.39          27.00
      3249        86.1760         735.00         716.58          27.11
      3250        86.2010         727.00         725.50          26.96
      3251        86.2260         720.00         736.37          26.83
      3252        86.2510         714.00         749.23          26.72
      3253        86.2760         739.00         764.18          27.18
      3254        86.3010         778.00         781.15          27.89
      3255        86.3260         778.00         799.99          27.89
      3256        86.3510         810.00         820.38          28.46
      3257        86.3760         842.00         841.91          29.02
      3258        86.4010         838.00         863.78          28.95
      3259        86.4260         890.00         885.19          29.83
      3260        86.4510         879.00         905.12          29.65
      3261        86.4760         907.00         922.34          30.12
      3262        86.5010         971.00         935.85          31.16
      3263        86.5260         971.00         944.64          31.16
      3264        86.5510         951.00         948.12          30.84
      3265        86.5760         950.00         946.30          30.82
      3266        86.6010         928.00         939.63          30.46
      3267        86.6260         955.00         928.91          30.90
      3268        86.6510         962.00         915.41          31.02
      3269        86.6760         919.00         899.91          30.32
      3270        86.7010         922.00         883.34          30.36
      3271        86.7260         908.00         866.36          30.13
      3272        86.7510         875.00         849.51          29.58
      3273        86.7760         849.00         833.15          29.14
      3274        86.8010         824.00         817.59          28.71
      3275        86.8260         873.00         803.07          29.55
      3276        86.8510         829.00         789.79          28.79
      3277        86.8760         837.00         777.94          28.93
      3278        86.9010         776.00         767.65          27.86
      3279        86.9260         755.00         759.10          27.48
      3280        86.9510         790.00         752.44          28.11
      3281        86.9760         761.00         748.01          27.59
      3282        87.0010         809.00         745.97          28.44
      3283        87.0260         777.00         746.53          27.87
      3284        87.0510         755.00         749.78          27.48
      3285        87.0760         744.00         755.73          27.28
      3286        87.1010         727.00         764.21          26.96
      3287        87.1260         746.00         774.91          27.31
      3288        87.1510         803.00         787.30          28.34
      3289        87.1760         831.00         800.73          28.83
      3290        87.2010         787.00         814.36          28.05
      3291        87.2260         898.00         827.21          29.97
      3292        87.2510         820.00         838.24          28.64
      3293        87.2760         846.00         846.42          29.09
      3294        87.3010         857.00         850.90          29.27
      3295        87.3260         951.00         851.15          30.84
      3296        87.3510         872.00         846.99          29.53
      3297        87.3760         847.00         838.80          29.10
      3298        87.4010         878.00         827.16          29.63
      3299        87.4260         834.00         813.22          28.88
      3300        87.4510         838.00         797.83          28.95
      3301        87.4760         735.00         781.93          27.11
      3302        87.5010         752.00         766.32          27.42
      3303        87.5260         755.00         751.67          27.48
      3304        87.5510         738.00         738.50          27.17
      3305        87.5760         740.00         727.14          27.20
      3306        87.6010         713.00         717.78          26.70
      3307        87.6260         720.00         710.62          26.83
      3308        87.6510         682.00         705.47          26.12
      3309        87.6760         718.00         702.41          26.80
      3310        87.7010         714.00         701.44          26.72
      3311        87.7260         705.00         702.59          26.55
      3312        87.7510         697.00         705.85          26.40
      3313        87.7760         696.00         711.51          26.38
      3314        87.8010         716.00         719.64          26.76
      3315        87.8260         692.00         730.39          26.31
      3316        87.8510         726.00         743.87          26.94
      3317        87.8760         732.00         759.97          27.06
      3318        87.9010         735.00         778.73          27.11
      3319        87.9260         764.00         799.73          27.64
      3320        87.9510         794.00         822.46          28.18
      3321        87.9760         804.00         846.18          28.35
      3322        88.0010         852.00         869.93          29.19
      3323        88.0260         848.00         892.72          29.12
      3324        88.0510         858.00         913.23          29.29
      3325        88.0760         885.00         930.40          29.75
      3326        88.1010         950.00         943.29          30.82
      3327        88.1260         927.00         951.30          30.45
      3328        88.1510         972.00         954.33          31.18
      3329        88.1760         981.00         952.60          31.32
      3330        88.2010         906.00         946.85          30.10
      3331        88.2260         892.00         937.98          29.87
      3332        88.2510         866.00         926.91          29.43
      3333        88.2760         877.00         914.50          29.61
      3334        88.3010         883.00         901.49          29.72
      3335        88.3260         841.00         888.41          29.00
      3336        88.3510         852.00         875.60          29.19
      3337        88.3760         859.00         863.19          29.31
      3338        88.4010         827.00         851.18          28.76
      3339        88.4260         759.00         839.54          27.55
      3340        88.4510         814.00         828.29          28.53
      3341        88.4760         816.00         817.56          28.57
      3342        88.5010         779.00         807.63          27.91
      3343        88.5260         792.00         799.04          28.14
      3344        88.5510         777.00         792.21          27.87
      3345        88.5760         771.00         787.66          27.77
      3346        88.6010         764.00         785.84          27.64
      3347        88.6260         723.00         787.18          26.89
      3348        88.6510         759.00         791.99          27.55
      3349        88.6760         781.00         800.49          27.95
      3350        88.7010         771.00         812.74          27.77
      3351        88.7260         774.00         828.66          27.82
      3352        88.7510         788.00         847.99          28.07
      3353        88.7760         825.00         870.36          28.72
      3354        88.8010         809.00         895.03          28.44
      3355        88.8260         838.00         921.32          28.95
      3356        88.8510         880.00         948.36          29.66
      3357        88.8760         876.00         975.19          29.60
      3358        88.9010         866.00        1000.80          29.43
      3359        88.9260         903.00        1024.19          30.05
      3360        88.9510         928.00        1044.36          30.46
      3361        88.9760         910.00        1060.35          30.17
      3362        89.0010         943.00        1071.21          30.71
      3363        89.0260         985.00        1076.34          31.38
      3364        89.0510        1016.00        1075.49          31.87
      3365        89.0760        1012.00        1068.94          31.81
      3366        89.1010         995.00        1057.50          31.54
      3367        89.1260         990.00        1042.34          31.46
      3368        89.1510         969.00        1024.84          31.13
      3369        89.1760         968.00        1006.39          31.11
      3370        89.2010         997.00         988.22          31.58
      3371        89.2260         982.00         971.27          31.34
      3372        89.2510         965.00         956.22          31.06
      3373        89.2760         972.00         943.39          31.18
      3374        89.3010         971.00         932.78          31.16
      3375        89.3260         936.00         924.22          30.59
      3376        89.3510         891.00         917.40          29.85
      3377        89.3760         890.00         911.95          29.83
      3378        89.4010         908.00         907.37          30.13
      3379        89.4260         905.00         903.23          30.08
      3380        89.4510         871.00         899.17          29.51
      3381        89.4760         860.00         894.93          29.33
      3382        89.5010         890.00         890.36          29.83
      3383        89.5260         906.00         885.75          30.10
      3384        89.5510         897.00         881.26          29.95
      3385        89.5760         887.00         877.05          29.78
      3386        89.6010         906.00         873.22          30.10
      3387        89.6260         889.00         869.70          29.82
      3388        89.6510         862.00         866.31          29.36
      3389        89.6760         883.00         862.68          29.72
      3390        89.7010         869.00         858.40          29.48
      3391        89.7260         826.00         853.01          28.74
      3392        89.7510         805.00         846.10          28.37
      3393        89.7760         808.00         837.53          28.43
      3394        89.8010         821.00         827.26          28.65
      3395        89.8260         794.00         815.47          28.18
      3396        89.8510         777.00         802.52          27.87
      3397        89.8760         774.00         788.85          27.82
      3398        89.9010         739.00         775.02          27.18
      3399        89.9260         748.00         761.41          27.35
      3400        89.9510         728.00         748.42          26.98
      3401        89.9760         737.00         736.44          27.15
      3402        90.0010         745.00         725.75          27.29
      3403        90.0260         721.00         716.53          26.85
      3404        90.0510         735.00         708.90          27.11
      3405        90.0760         724.00         702.90          26.91
      3406        90.1010         681.00         698.52          26.10
      3407        90.1260         696.00         695.69          26.38
      3408        90.1510         710.00         694.35          26.65
      3409        90.1760         692.00         694.38          26.31
      3410        90.2010         687.00         695.68          26.21
      3411        90.2260         711.00         698.13          26.66
      3412        90.2510         732.00         701.59          27.06
      3413        90.2760         729.00         705.92          27.00
      3414        90.3010         707.00         710.98          26.59
      3415        90.3260         737.00         716.51          27.15
      3416        90.3510         716.00         722.57          26.76
      3417        90.3760         724.00         728.91          26.91
      3418        90.4010         739.00         735.39          27.18
      3419        90.4260         749.00         741.94          27.37
      3420        90.4510         754.00         748.51          27.46
      3421        90.4760         729.00         755.14          27.00
      3422        90.5010         733.00         761.95          27.07
      3423        90.5260         742.00         769.11          27.24
      3424        90.5510         723.00         776.80          26.89
      3425        90.5760         763.00         785.15          27.62
      3426        90.6010         785.00         794.15          28.02
      3427        90.6260         797.00         803.71          28.23
      3428        90.6510         807.00         813.55          28.41
      3429        90.6760         821.00         823.28          28.65
      3430        90.7010         827.00         832.36          28.76
      3431        90.7260         835.00         840.21          28.90
      3432        90.7510         869.00         846.25          29.48
      3433        90.7760         852.00         850.00          29.19
      3434        90.8010         905.00         851.20          30.08
      3435        90.8260         933.00         849.92          30.55
      3436        90.8510         909.00         846.52          30.15
      3437        90.8760         865.00         841.63          29.41
      3438        90.9010         813.00         836.01          28.51
      3439        90.9260         853.00         830.52          29.21
      3440        90.9510         853.00         825.97          29.21
      3441        90.9760         799.00         823.09          28.27
      3442        91.0010         855.00         822.44          29.24
      3443        91.0260         842.00         824.41          29.02
      3444        91.0510         842.00         829.11          29.02
      3445        91.0760         806.00         836.45          28.39
      3446        91.1010         840.00         846.02          28.98
      3447        91.1260         842.00         857.19          29.02
      3448        91.1510         860.00         869.22          29.33
      3449        91.1760         903.00         881.10          30.05
      3450        91.2010         951.00         892.03          30.84
      3451        91.2260         888.00         901.04          29.80
      3452        91.2510         948.00         907.40          30.79
      3453        91.2760         949.00         910.55          30.81
      3454        91.3010         938.00         910.15          30.63
      3455        91.3260         969.00         906.15          31.13
      3456        91.3510        1007.00         898.70          31.73
      3457        91.3760         922.00         888.26          30.36
      3458        91.4010         918.00         875.49          30.30
      3459        91.4260         860.00         861.20          29.33
      3460        91.4510         867.00         846.21          29.44
      3461        91.4760         851.00         831.27          29.17
      3462        91.5010         819.00         816.97          28.62
      3463        91.5260         816.00         803.93          28.57
      3464        91.5510         795.00         792.40          28.20
      3465        91.5760         804.00         782.60          28.35
      3466        91.6010         806.00         774.59          28.39
      3467        91.6260         811.00         768.38          28.48
      3468        91.6510         815.00         763.92          28.55
      3469        91.6760         779.00         761.19          27.91
      3470        91.7010         793.00         760.17          28.16
      3471        91.7260         805.00         760.87          28.37
      3472        91.7510         778.00         763.26          27.89
      3473        91.7760         776.00         767.33          27.86
      3474        91.8010         745.00         772.97          27.29
      3475        91.8260         784.00         780.04          28.00
      3476        91.8510         753.00         788.19          27.44
      3477        91.8760         770.00         797.08          27.75
      3478        91.9010         769.00         806.28          27.73
      3479        91.9260         790.00         815.24          28.11
      3480        91.9510         818.00         823.33          28.60
      3481        91.9760         803.00         830.10          28.34
      3482        92.0010         810.00         835.04          28.46
      3483        92.0260         831.00         837.90          28.83
      3484        92.0510         842.00         838.50          29.02
      3485        92.0760         855.00         836.95          29.24
      3486        92.1010         851.00         833.43          29.17
      3487        92.1260         851.00         828.08          29.17
      3488        92.1510         833.00         821.53          28.86
      3489        92.1760         837.00         814.02          28.93
      3490        92.2010         830.00         805.88          28.81
      3491        92.2260         848.00         797.65          29.12
      3492        92.2510         787.00         789.70          28.05
      3493        92.2760         798.00         782.48          28.25
      3494        92.3010         802.00         776.36          28.32
      3495        92.3260         792.00         771.61          28.14
      3496        92.3510         781.00         768.44          27.95
      3497        92.3760         748.00         766.88          27.35
      3498        92.4010         745.00         766.87          27.29
      3499        92.4260         736.00         768.22          27.13
      3500        92.4510         768.00         770.74          27.71
      3501        92.4760         781.00         774.04          27.95
      3502        92.5010         814.00         777.72          28.53
      3503        92.5260         815.00         781.35          28.55
      3504        92.5510         798.00         784.56          28.25
      3505        92.5760         782.00         786.94          27.96
      3506        92.6010         787.00         788.39          28.05
      3507        92.6260         817.00         788.67          28.58
      3508        92.6510         769.00         787.70          27.73
      3509        92.6760         748.00         785.49          27.35
      3510        92.7010         760.00         782.17          27.57
      3511        92.7260         775.00         777.94          27.84
      3512        92.7510         805.00         773.11          28.37
      3513        92.7760         811.00         767.86          28.48
      3514        92.8010         788.00         762.54          28.07
      3515        92.8260         742.00         757.47          27.24
      3516        92.8510         719.00         753.02          26.81
      3517        92.8760         723.00         749.48          26.89
      3518        92.9010         728.00         747.13          26.98
      3519        92.9260         743.00         746.24          27.26
      3520        92.9510         737.00         746.90          27.15
      3521        92.9760         718.00         749.08          26.80
      3522        93.0010         717.00         752.73          26.78
      3523        93.0260         758.00         757.54          27.53
      3524        93.0510         789.00         763.23          28.09
      3525        93.0760         798.00         769.37          28.25
      3526        93.1010         754.00         775.46          27.46
      3527        93.1260         764.00         780.95          27.64
      3528        93.1510         821.00         785.31          28.65
      3529        93.1760         815.00         788.07          28.55
      3530        93.2010         810.00         788.80          28.46
      3531        93.2260         808.00         787.28          28.43
      3532        93.2510         820.00         783.51          28.64
      3533        93.2760         827.00         777.67          28.76
      3534        93.3010         793.00         770.10          28.16
      3535        93.3260         771.00         761.24          27.77
      3536        93.3510         778.00         751.55          27.89
      3537        93.3760         743.00         741.50          27.26
      3538        93.4010         715.00         731.51          26.74
      3539        93.4260         712.00         721.93          26.68
      3540        93.4510         722.00         713.05          26.87
      3541        93.4760         715.00         705.09          26.74
      3542        93.5010         670.00         698.17          25.88
      3543        93.5260         687.00         692.37          26.21
      3544        93.5510         688.00         687.66          26.23
      3545        93.5760         712.00         684.01          26.68
      3546        93.6010         728.00         681.38          26.98
      3547        93.6260         705.00         679.52          26.55
      3548        93.6510         691.00         678.42          26.29
      3549        93.6760         717.00         677.92          26.78
      3550        93.7010         697.00         677.87          26.40
      3551        93.7260         706.00         678.16          26.57
      3552        93.7510         716.00         678.67          26.76
      3553        93.7760         703.00         679.26          26.51
      3554        93.8010         696.00         679.86          26.38
      3555        93.8260         704.00         680.35          26.53
      3556        93.8510         718.00         680.69          26.80
      3557        93.8760         680.00         680.82          26.08
      3558        93.9010         659.00         680.75          25.67
      3559        93.9260         708.00         680.49          26.61
      3560        93.9510         746.00         680.01          27.31
      3561        93.9760         722.00         679.33          26.87
      3562        94.0010         691.00         678.72          26.29
      3563        94.0260         711.00         678.20          26.66
      3564        94.0510         731.00         677.78          27.04
      3565        94.0760         705.00         677.55          26.55
      3566        94.1010         688.00         677.62          26.23
      3567        94.1260         693.00         678.02          26.32
      3568        94.1510         702.00         678.78          26.50
      3569        94.1760         663.00         679.94          25.75
      3570        94.2010         690.00         681.48          26.27
      3571        94.2260         678.00         683.37          26.04
      3572        94.2510         701.00         685.55          26.48
      3573        94.2760         688.00         687.94          26.23
      3574        94.3010         662.00         690.44          25.73
      3575        94.3260         683.00         692.94          26.13
      3576        94.3510         705.00         695.36          26.55
      3577        94.3760         686.00         697.47          26.19
      3578        94.4010         683.00         699.22          26.13
      3579        94.4260         735.00         700.44          27.11
      3580        94.4510         726.00         701.20          26.94
      3581        94.4760         729.00         701.54          27.00
      3582        94.5010         709.00         701.33          26.63
      3583        94.5260         685.00         700.78          26.17
      3584        94.5510         701.00         699.99          26.48
      3585        94.5760         693.00         699.18          26.32
      3586        94.6010         714.00         698.49          26.72
      3587        94.6260         738.00         698.10          27.17
      3588        94.6510         737.00         698.05          27.15
      3589        94.6760         693.00         698.62          26.32
      3590        94.7010         709.00         699.62          26.63
      3591        94.7260         710.00         701.22          26.65
      3592        94.7510         696.00         703.43          26.38
      3593        94.7760         715.00         706.22          26.74
      3594        94.8010         707.00         709.56          26.59
      3595        94.8260         707.00         713.38          26.59
      3596        94.8510         755.00         717.62          27.48
      3597        94.8760         687.00         722.17          26.21
      3598        94.9010         745.00         727.03          27.29
      3599        94.9260         756.00         732.12          27.50
      3600        94.9510         738.00         737.41          27.17
      3601        94.9760         717.00         742.90          26.78
      3602        95.0010         748.00         748.55          27.35
      3603        95.0260         746.00         754.32          27.31
      3604        95.0510         794.00         760.12          28.18
      3605        95.0760         715.00         765.85          26.74
      3606        95.1010         728.00         771.39          26.98
      3607        95.1260         737.00         776.56          27.15
      3608        95.1510         763.00         781.21          27.62
      3609        95.1760         765.00         785.20          27.66
      3610        95.2010         790.00         788.64          28.11
      3611        95.2260         783.00         790.97          27.98
      3612        95.2510         760.00         792.29          27.57
      3613        95.2760         830.00         792.76          28.81
      3614        95.3010         777.00         792.36          27.87
      3615        95.3260         816.00         791.18          28.57
      3616        95.3510         796.00         789.32          28.21
      3617        95.3760         790.00         786.85          28.11
      3618        95.4010         758.00         783.90          27.53
      3619        95.4260         815.00         780.48          28.55
      3620        95.4510         832.00         776.70          28.84
      3621        95.4760         797.00         772.66          28.23
      3622        95.5010         812.00         768.56          28.50
      3623        95.5260         815.00         764.51          28.55
      3624        95.5510         811.00         760.70          28.48
      3625        95.5760         833.00         757.33          28.86
      3626        95.6010         794.00         754.38          28.18
      3627        95.6260         773.00         751.95          27.80
      3628        95.6510         773.00         750.08          27.80
      3629        95.6760         797.00         748.75          28.23
      3630        95.7010         739.00         747.91          27.18
      3631        95.7260         756.00         747.59          27.50
      3632        95.7510         829.00         747.50          28.79
      3633        95.7760         824.00         747.71          28.71
      3634        95.8010         794.00         748.20          28.18
      3635        95.8260         767.00         749.01          27.69
      3636        95.8510         761.00         750.31          27.59
      3637        95.8760         761.00         752.26          27.59
      3638        95.9010         756.00         755.04          27.50
      3639        95.9260         782.00         758.83          27.96
      3640        95.9510         761.00         763.84          27.59
      3641        95.9760         808.00         770.15          28.43
      3642        96.0010         785.00         777.77          28.02
      3643        96.0260         809.00         786.66          28.44
      3644        96.0510         811.00         796.67          28.48
      3645        96.0760         812.00         807.54          28.50
      3646        96.1010         826.00         818.93          28.74
      3647        96.1260         823.00         830.49          28.69
      3648        96.1510         857.00         841.77          29.27
      3649        96.1760         910.00         852.33          30.17
      3650        96.2010         936.00         861.75          30.59
      3651        96.2260         915.00         869.76          30.25
      3652        96.2510         917.00         876.11          30.28
      3653        96.2760         918.00         880.80          30.30
      3654        96.3010         925.00         883.95          30.41
      3655        96.3260         921.00         885.77          30.35
      3656        96.3510         912.00         886.43          30.20
      3657        96.3760         891.00         886.14          29.85
      3658        96.4010         861.00         885.05          29.34
      3659        96.4260         876.00         883.24          29.60
      3660        96.4510         905.00         880.79          30.08
      3661        96.4760         902.00         877.63          30.03
      3662        96.5010         886.00         873.79          29.77
      3663        96.5260         880.00         869.24          29.66
      3664        96.5510         853.00         864.04          29.21
      3665        96.5760         838.00         858.25          28.95
      3666        96.6010         872.00         851.85          29.53
      3667        96.6260         892.00         844.86          29.87
      3668        96.6510         867.00         837.31          29.44
      3669        96.6760         850.00         829.27          29.15
      3670        96.7010         880.00         820.87          29.66
      3671        96.7260         865.00         812.30          29.41
      3672        96.7510         843.00         803.81          29.03
      3673        96.7760         832.00         795.72          28.84
      3674        96.8010         779.00         788.31          27.91
      3675        96.8260         779.00         781.87          27.91
      3676        96.8510         791.00         776.68          28.12
      3677        96.8760         775.00         772.84          27.84
      3678        96.9010         757.00         770.51          27.51
      3679        96.9260         762.00         769.74          27.60
      3680        96.9510         754.00         770.51          27.46
      3681        96.9760         771.00         772.76          27.77
      3682        97.0010         743.00         776.37          27.26
      3683        97.0260         739.00         781.20          27.18
      3684        97.0510         723.00         787.07          26.89
      3685        97.0760         760.00         793.83          27.57
      3686        97.1010         802.00         801.32          28.32
      3687        97.1260         798.00         809.45          28.25
      3688        97.1510         798.00         818.18          28.25
      3689        97.1760         789.00         827.53          28.09
      3690        97.2010         787.00         837.53          28.05
      3691        97.2260         802.00         848.24          28.32
      3692        97.2510         790.00         859.69          28.11
      3693        97.2760         826.00         871.80          28.74
      3694        97.3010         839.00         884.39          28.97
      3695        97.3260         856.00         897.19          29.26
      3696        97.3510         847.00         909.78          29.10
      3697        97.3760         824.00         921.69          28.71
      3698        97.4010         849.00         932.38          29.14
      3699        97.4260         892.00         941.32          29.87
      3700        97.4510         889.00         947.98          29.82
      3701        97.4760         884.00         952.09          29.73
      3702        97.5010         884.00         953.54          29.73
      3703        97.5260         903.00         952.42          30.05
      3704        97.5510         905.00         949.02          30.08
      3705        97.5760         852.00         943.83          29.19
      3706        97.6010         884.00         937.47          29.73
      3707        97.6260         941.00         930.68          30.68
      3708        97.6510         919.00         924.29          30.32
      3709        97.6760         879.00         919.15          29.65
      3710        97.7010         876.00         916.22          29.60
      3711        97.7260         833.00         915.83          28.86
      3712        97.7510         869.00         918.70          29.48
      3713        97.7760         868.00         925.22          29.46
      3714        97.8010         915.00         935.56          30.25
      3715        97.8260         905.00         949.70          30.08
      3716        97.8510         930.00         967.39          30.50
      3717        97.8760         965.00         988.25          31.06
      3718        97.9010         994.00        1011.68          31.53
      3719        97.9260         957.00        1036.95          30.94
      3720        97.9510        1005.00        1063.25          31.70
      3721        97.9760        1035.00        1089.63          32.17
      3722        98.0010         987.00        1115.12          31.42
      3723        98.0260        1104.00        1138.72          33.23
      3724        98.0510        1140.00        1159.46          33.76
      3725        98.0760        1126.00        1176.48          33.56
      3726        98.1010        1147.00        1189.06          33.87
      3727        98.1260        1169.00        1196.70          34.19
      3728        98.1510        1187.00        1199.16          34.45
      3729        98.1760        1159.00        1196.11          34.04
      3730        98.2010        1221.00        1187.69          34.94
      3731        98.2260        1276.00        1174.17          35.72
      3732        98.2510        1319.00        1156.01          36.32
      3733        98.2760        1313.00        1133.96          36.24
      3734        98.3010        1229.00        1109.00          35.06
      3735        98.3260        1223.00        1082.37          34.97
      3736        98.3510        1155.00        1055.43          33.99
      3737        98.3760        1073.00        1029.55          32.76
      3738        98.4010        1082.00        1006.04          32.89
      3739        98.4260        1026.00         986.12          32.03
      3740        98.4510         908.00         970.80          30.13
      3741        98.4760         921.00         960.86          30.35
      3742        98.5010         919.00         956.85          30.32
      3743        98.5260         864.00         959.01          29.39
      3744        98.5510         907.00         967.34          30.12
      3745        98.5760         918.00         981.43          30.30
      3746        98.6010         948.00        1000.68          30.79
      3747        98.6260         969.00        1024.17          31.13
      3748        98.6510         961.00        1050.74          31.00
      3749        98.6760        1023.00        1078.99          31.98
      3750        98.7010        1049.00        1107.52          32.39
      3751        98.7260        1181.00        1134.74          34.37
      3752        98.7510        1225.00        1159.14          35.00
      3753        98.7760        1229.00        1179.30          35.06
      3754        98.8010        1325.00        1194.19          36.40
      3755        98.8260        1278.00        1203.13          35.75
      3756        98.8510        1363.00        1206.06          36.92
      3757        98.8760        1301.00        1203.39          36.07
      3758        98.9010        1342.00        1195.96          36.63
      3759        98.9260        1244.00        1185.00          35.27
      3760        98.9510        1196.00        1171.67          34.58
      3761        98.9760        1167.00        1157.26          34.16
      3762        99.0010        1052.00        1142.97          32.43
      3763        99.0260        1060.00        1129.60          32.56
      3764        99.0510         994.00        1117.98          31.53
      3765        99.0760        1003.00        1108.59          31.67
      3766        99.1010        1030.00        1101.64          32.09
      3767        99.1260         952.00        1097.08          30.85
      3768        99.1510         989.00        1094.59          31.45
      3769        99.1760        1033.00        1093.58          32.14
      3770        99.2010        1075.00        1093.32          32.79
      3771        99.2260        1075.00        1092.97          32.79
      3772        99.2510        1072.00        1091.72          32.74
      3773        99.2760        1088.00        1088.78          32.98
      3774        99.3010        1105.00        1083.62          33.24
      3775        99.3260        1118.00        1075.75          33.44
      3776        99.3510        1114.00        1064.93          33.38
      3777        99.3760        1065.00        1051.11          32.63
      3778        99.4010        1061.00        1034.47          32.57
      3779        99.4260        1084.00        1015.43          32.92
      3780        99.4510        1060.00         994.57          32.56
      3781        99.4760        1031.00         972.62          32.11
      3782        99.5010         970.00         950.35          31.14
      3783        99.5260         933.00         928.60          30.55
      3784        99.5510         911.00         907.95          30.18
      3785        99.5760         868.00         889.04          29.46
      3786        99.6010         861.00         872.34          29.34
      3787        99.6260         872.00         858.20          29.53
      3788        99.6510         863.00         846.81          29.38
      3789        99.6760         814.00         838.23          28.53
      3790        99.7010         819.00         832.42          28.62
      3791        99.7260         829.00         829.16          28.79
      3792        99.7510         797.00         828.31          28.23
      3793        99.7760         876.00         829.54          29.60
      3794        99.8010         871.00         832.47          29.51
      3795        99.8260         859.00         836.70          29.31
      3796        99.8510         863.00         841.91          29.38
      3797        99.8760         837.00         847.45          28.93
      3798        99.9010         847.00         853.01          29.10
      3799        99.9260         856.00         858.20          29.26
      3800        99.9510         846.00         862.69          29.09
      3801        99.9760         851.00         866.20          29.17
      3802       100.0010         847.00         868.48          29.10
      3803       100.0260         856.00         869.47          29.26
      3804       100.0510         854.00         869.04          29.22
      3805       100.0760         842.00         867.16          29.02
      3806       100.1010         870.00         863.88          29.50
      3807       100.1260         867.00         859.29          29.44
      3808       100.1510         833.00         853.54          28.86
      3809       100.1760         819.00         846.84          28.62
      3810       100.2010         806.00         839.47          28.39
      3811       100.2260         805.00         831.71          28.37
      3812       100.2510         817.00         823.88          28.58
      3813       100.2760         825.00         816.26          28.72
      3814       100.3010         785.00         809.11          28.02
      3815       100.3260         786.00         802.63          28.04
      3816       100.3510         802.00         797.08          28.32
      3817       100.3760         780.00         792.42          27.93
      3818       100.4010         781.00         788.78          27.95
      3819       100.4260         786.00         786.16          28.04
      3820       100.4510         776.00         784.51          27.86
      3821       100.4760         817.00         783.70          28.58
      3822       100.5010         818.00         783.63          28.60
      3823       100.5260         755.00         784.09          27.48
      3824       100.5510         745.00         784.94          27.29
      3825       100.5760         778.00         786.08          27.89
      3826       100.6010         825.00         787.26          28.72
      3827       100.6260         804.00         788.48          28.35
      3828       100.6510         785.00         789.71          28.02
      3829       100.6760         795.00         790.95          28.20
      3830       100.7010         828.00         792.34          28.77
      3831       100.7260         843.00         793.94          29.03
      3832       100.7510         828.00         795.83          28.77
      3833       100.7760         796.00         798.13          28.21
      3834       100.8010         828.00         800.96          28.77
      3835       100.8260         826.00         804.39          28.74
      3836       100.8510         839.00         808.41          28.97
      3837       100.8760         850.00         813.11          29.15
      3838       100.9010         868.00         818.54          29.46
      3839       100.9260         889.00         824.73          29.82
      3840       100.9510         854.00         831.71          29.22
      3841       100.9760         845.00         839.53          29.07
      3842       101.0010         872.00         848.26          29.53
      3843       101.0260         919.00         857.89          30.32
      3844       101.0510         906.00         868.59          30.10
      3845       101.0760         893.00         880.37          29.88
      3846       101.1010         893.00         893.22          29.88
      3847       101.1260         874.00         907.12          29.56
      3848       101.1510         904.00         921.98          30.07
      3849       101.1760         908.00         937.77          30.13
      3850       101.2010         900.00         954.35          30.00
      3851       101.2260         904.00         971.57          30.07
      3852       101.2510         928.00         989.22          30.46
      3853       101.2760         962.00        1007.06          31.02
      3854       101.3010         950.00        1024.78          30.82
      3855       101.3260         950.00        1041.98          30.82
      3856       101.3510         968.00        1058.14          31.11
      3857       101.3760        1048.00        1072.69          32.37
      3858       101.4010        1065.00        1084.97          32.63
      3859       101.4260        1105.00        1094.33          33.24
      3860       101.4510        1138.00        1100.21          33.73
      3861       101.4760        1153.00        1102.10          33.96
      3862       101.5010        1118.00        1099.78          33.44
      3863       101.5260        1098.00        1093.41          33.14
      3864       101.5510        1110.00        1083.36          33.32
      3865       101.5760        1058.00        1070.28          32.53
      3866       101.6010        1059.00        1054.99          32.54
      3867       101.6260        1057.00        1038.41          32.51
      3868       101.6510        1036.00        1021.41          32.19
      3869       101.6760        1003.00        1004.95          31.67
      3870       101.7010         928.00         989.66          30.46
      3871       101.7260         903.00         976.12          30.05
      3872       101.7510         889.00         964.75          29.82
      3873       101.7760         920.00         955.73          30.33
      3874       101.8010         888.00         949.04          29.80
      3875       101.8260         900.00         944.53          30.00
      3876       101.8510         927.00         941.81          30.45
      3877       101.8760         969.00         940.44          31.13
      3878       101.9010         957.00         940.01          30.94
      3879       101.9260        1014.00         939.87          31.84
      3880       101.9510         951.00         939.49          30.84
      3881       101.9760        1039.00         938.41          32.23
      3882       102.0010         973.00         936.29          31.19
      3883       102.0260         978.00         933.00          31.27
      3884       102.0510         947.00         928.55          30.77
      3885       102.0760         936.00         923.10          30.59
      3886       102.1010         944.00         916.93          30.72
      3887       102.1260         954.00         910.39          30.89
      3888       102.1510         914.00         903.83          30.23
      3889       102.1760         895.00         897.61          29.92
      3890       102.2010         891.00         892.09          29.85
      3891       102.2260         895.00         887.57          29.92
      3892       102.2510         888.00         884.32          29.80
      3893       102.2760         870.00         882.53          29.50
      3894       102.3010         863.00         882.39          29.38
      3895       102.3260         898.00         883.93          29.97
      3896       102.3510         854.00         887.17          29.22
      3897       102.3760         868.00         892.07          29.46
      3898       102.4010         880.00         898.51          29.66
      3899       102.4260         901.00         906.35          30.02
      3900       102.4510         919.00         915.37          30.32
      3901       102.4760         873.00         925.16          29.55
      3902       102.5010         915.00         935.92          30.25
      3903       102.5260         890.00         947.15          29.83
      3904       102.5510         936.00         958.53          30.59
      3905       102.5760         971.00         969.72          31.16
      3906       102.6010         974.00         980.34          31.21
      3907       102.6260         967.00         990.03          31.10
      3908       102.6510         983.00         998.44          31.35
      3909       102.6760         972.00        1005.24          31.18
      3910       102.7010         998.00        1010.16          31.59
      3911       102.7260        1011.00        1013.05          31.80
      3912       102.7510        1038.00        1013.72          32.22
      3913       102.7760        1081.00        1012.05          32.88
      3914       102.8010        1028.00        1007.97          32.06
      3915       102.8260        1072.00        1001.48          32.74
      3916       102.8510        1127.00         992.67          33.57
      3917       102.8760        1077.00         981.68          32.82
      3918       102.9010        1088.00         968.74          32.98
      3919       102.9260        1068.00         954.23          32.68
      3920       102.9510        1062.00         938.66          32.59
      3921       102.9760         982.00         922.43          31.34
      3922       103.0010         980.00         906.06          31.31
      3923       103.0260         985.00         890.06          31.38
      3924       103.0510         906.00         874.87          30.10
      3925       103.0760         869.00         860.77          29.48
      3926       103.1010         845.00         848.34          29.07
      3927       103.1260         879.00         837.70          29.65
      3928       103.1510         825.00         829.06          28.72
      3929       103.1760         807.00         822.51          28.41
      3930       103.2010         788.00         818.10          28.07
      3931       103.2260         785.00         815.79          28.02
      3932       103.2510         802.00         815.54          28.32
      3933       103.2760         803.00         817.16          28.34
      3934       103.3010         810.00         820.47          28.46
      3935       103.3260         849.00         825.32          29.14
      3936       103.3510         848.00         831.49          29.12
      3937       103.3760         818.00         838.75          28.60
      3938       103.4010         881.00         846.92          29.68
      3939       103.4260         931.00         855.78          30.51
      3940       103.4510         895.00         865.19          29.92
      3941       103.4760         910.00         875.01          30.17
      3942       103.5010         913.00         885.17          30.22
      3943       103.5260         886.00         895.57          29.77
      3944       103.5510         861.00         906.16          29.34
      3945       103.5760         891.00         916.92          29.85
      3946       103.6010         930.00         927.67          30.50
      3947       103.6260         950.00         938.26          30.82
      3948       103.6510         922.00         948.43          30.36
      3949       103.6760         904.00         957.98          30.07
      3950       103.7010         985.00         966.52          31.38
      3951       103.7260        1017.00         973.75          31.89
      3952       103.7510        1001.00         979.20          31.64
      3953       103.7760        1009.00         982.62          31.76
      3954       103.8010        1063.00         983.77          32.60
      3955       103.8260        1095.00         982.56          33.09
      3956       103.8510        1099.00         979.08          33.15
      3957       103.8760        1113.00         973.54          33.36
      3958       103.9010        1089.00         966.43          33.00
      3959       103.9260        1059.00         958.22          32.54
      3960       103.9510        1043.00         949.47          32.30
      3961       103.9760        1014.00         940.81          31.84
      3962       104.0010         938.00         932.81          30.63
      3963       104.0260         953.00         926.01          30.87
      3964       104.0510         960.00         920.89          30.98
      3965       104.0760         925.00         917.82          30.41
      3966       104.1010         902.00         917.10          30.03
      3967       104.1260         892.00         918.85          29.87
      3968       104.1510         872.00         923.09          29.53
      3969       104.1760         877.00         929.76          29.61
      3970       104.2010         900.00         938.65          30.00
      3971       104.2260         904.00         949.47          30.07
      3972       104.2510         919.00         961.82          30.32
      3973       104.2760         969.00         975.28          31.13
      3974       104.3010        1004.00         989.33          31.69
      3975       104.3260        1039.00        1003.50          32.23
      3976       104.3510        1032.00        1017.33          32.12
      3977       104.3760        1008.00        1030.48          31.75
      3978       104.4010        1027.00        1042.63          32.05
      3979       104.4260        1082.00        1053.51          32.89
      3980       104.4510        1031.00        1062.98          32.11
      3981       104.4760         999.00        1070.91          31.61
      3982       104.5010        1037.00        1077.23          32.20
      3983       104.5260        1018.00        1081.91          31.91
      3984       104.5510        1015.00        1084.97          31.86
      3985       104.5760        1022.00        1086.53          31.97
      3986       104.6010         998.00        1086.53          31.59
      3987       104.6260        1004.00        1085.13          31.69
      3988       104.6510        1029.00        1082.46          32.08
      3989       104.6760        1006.00        1078.63          31.72
      3990       104.7010        1003.00        1073.73          31.67
      3991       104.7260        1010.00        1067.81          31.78
      3992       104.7510        1028.00        1060.95          32.06
      3993       104.7760         994.00        1053.13          31.53
      3994       104.8010        1008.00        1044.35          31.75
      3995       104.8260        1014.00        1034.62          31.84
      3996       104.8510         983.00        1024.01          31.35
      3997       104.8760        1004.00        1012.62          31.69
      3998       104.9010         952.00        1000.64          30.85
      3999       104.9260         951.00         988.22          30.84
      4000       104.9510         942.00         975.57          30.69
      4001       104.9760         945.00         962.91          30.74
      4002       105.0010         921.00         950.39          30.35
      4003       105.0260         918.00         938.24          30.30
      4004       105.0510         885.00         926.60          29.75
      4005       105.0760         862.00         915.57          29.36
      4006       105.1010         894.00         905.28          29.90
      4007       105.1260         871.00         895.85          29.51
      4008       105.1510         898.00         887.37          29.97
      4009       105.1760         868.00         879.94          29.46
      4010       105.2010         859.00         873.62          29.31
      4011       105.2260         876.00         868.49          29.60
      4012       105.2510         854.00         864.58          29.22
      4013       105.2760         870.00         861.89          29.50
      4014       105.3010         844.00         860.41          29.05
      4015       105.3260         867.00         859.91          29.44
      4016       105.3510         866.00         860.66          29.43
      4017       105.3760         888.00         862.35          29.80
      4018       105.4010         901.00         864.83          30.02
      4019       105.4260         897.00         867.90          29.95
      4020       105.4510         859.00         871.34          29.31
      4021       105.4760         884.00         874.94          29.73
      4022       105.5010         937.00         878.48          30.61
      4023       105.5260         961.00         881.76          31.00
      4024       105.5510         906.00         884.61          30.10
      4025       105.5760         901.00         886.87          30.02
      4026       105.6010         930.00         888.46          30.50
      4027       105.6260         876.00         889.31          29.60
      4028       105.6510         914.00         889.39          30.23
      4029       105.6760         929.00         888.69          30.48
      4030       105.7010         912.00         887.25          30.20
      4031       105.7260         915.00         885.12          30.25
      4032       105.7510         877.00         882.39          29.61
      4033       105.7760         885.00         879.13          29.75
      4034       105.8010         896.00         875.46          29.93
      4035       105.8260         911.00         871.46          30.18
      4036       105.8510         859.00         867.13          29.31
      4037       105.8760         841.00         862.73          29.00
      4038       105.9010         831.00         858.22          28.83
      4039       105.9260         842.00         853.64          29.02
      4040       105.9510         821.00         849.03          28.65
      4041       105.9760         821.00         844.43          28.65
      4042       106.0010         837.00         839.90          28.93
      4043       106.0260         805.00         835.50          28.37
      4044       106.0510         807.00         831.34          28.41
      4045       106.0760         829.00         827.51          28.79
      4046       106.1010         781.00         824.12          27.95
      4047       106.1260         867.00         821.30          29.44
      4048       106.1510         789.00         819.12          28.09
      4049       106.1760         853.00         817.66          29.21
      4050       106.2010         759.00         816.95          27.55
      4051       106.2260         775.00         817.00          27.84
      4052       106.2510         826.00         817.80          28.74
      4053       106.2760         797.00         819.29          28.23
      4054       106.3010         750.00         821.35          27.39
      4055       106.3260         839.00         823.91          28.97
      4056       106.3510         862.00         826.80          29.36
      4057       106.3760         821.00         829.84          28.65
      4058       106.4010         831.00         832.88          28.83
      4059       106.4260         873.00         835.72          29.55
      4060       106.4510         844.00         838.15          29.05
      4061       106.4760         869.00         840.04          29.48
      4062       106.5010         912.00         841.27          30.20
      4063       106.5260         892.00         841.72          29.87
      4064       106.5510         908.00         841.39          30.13
      4065       106.5760         835.00         840.17          28.90
      4066       106.6010         827.00         838.14          28.76
      4067       106.6260         835.00         835.29          28.90
      4068       106.6510         886.00         831.70          29.77
      4069       106.6760         809.00         827.48          28.44
      4070       106.7010         827.00         822.72          28.76
      4071       106.7260         863.00         817.65          29.38
      4072       106.7510         804.00         812.42          28.35
      4073       106.7760         817.00         807.19          28.58
      4074       106.8010         827.00         802.05          28.76
      4075       106.8260         841.00         797.30          29.00
      4076       106.8510         775.00         793.00          27.84
      4077       106.8760         789.00         789.25          28.09
      4078       106.9010         802.00         786.15          28.32
      4079       106.9260         778.00         783.75          27.89
      4080       106.9510         778.00         782.10          27.89
      4081       106.9760         815.00         781.20          28.55
      4082       107.0010         771.00         781.07          27.77
      4083       107.0260         758.00         781.68          27.53
      4084       107.0510         766.00         783.01          27.68
      4085       107.0760         793.00         785.01          28.16
      4086       107.1010         787.00         787.64          28.05
      4087       107.1260         768.00         790.84          27.71
      4088       107.1510         760.00         794.57          27.57
      4089       107.1760         766.00         798.78          27.68
      4090       107.2010         803.00         803.42          28.34
      4091       107.2260         831.00         808.46          28.83
      4092       107.2510         807.00         813.84          28.41
      4093       107.2760         806.00         819.50          28.39
      4094       107.3010         823.00         825.38          28.69
      4095       107.3260         822.00         831.41          28.67
      4096       107.3510         829.00         837.48          28.79
      4097       107.3760         823.00         843.54          28.69
      4098       107.4010         862.00         849.44          29.36
      4099       107.4260         876.00         855.06          29.60
      4100       107.4510         865.00         860.44          29.41
      4101       107.4760         878.00         865.50          29.63
      4102       107.5010         895.00         870.20          29.92
      4103       107.5260         925.00         874.59          30.41
      4104       107.5510         904.00         878.71          30.07
      4105       107.5760         863.00         882.66          29.38
      4106       107.6010         883.00         886.51          29.72
      4107       107.6260         872.00         890.37          29.53
      4108       107.6510         909.00         894.18          30.15
      4109       107.6760         911.00         897.99          30.18
      4110       107.7010         856.00         901.80          29.26
      4111       107.7260         858.00         905.54          29.29
      4112       107.7510         887.00         909.12          29.78
      4113       107.7760         906.00         912.45          30.10
      4114       107.8010         884.00         915.29          29.73
      4115       107.8260         898.00         917.77          29.97
      4116       107.8510         937.00         919.64          30.61
      4117       107.8760         957.00         920.84          30.94
      4118       107.9010         950.00         921.28          30.82
      4119       107.9260         930.00         920.95          30.50
      4120       107.9510         930.00         919.82          30.50

# 12. STRUCTURE-FACTOR LIST

loop_
 _refln_index_h
 _refln_index_k
 _refln_index_l
 _refln_F_squared_calc
 _refln_F_squared_meas
 _refln_F_squared_sigma
 _refln_observed_status
 _refln_d_spacing
   0   1   0      246.69      252.35        9.63 o  6.045366  
   2   0   0        3.87        2.42        0.74 o  5.531391  
   1   1   0     5323.91     5197.48      105.58 o  5.304957  
   2   0  -1    12049.29    12094.87      244.02 o  4.761040  
   2   0   1    12049.28    12094.86      243.91 o  4.761040  
   0   0  -2      283.99      277.28        7.04 o  4.676303  
   0   0   2      283.99      277.28        6.64 o  4.676303  
   1   1   1     3978.77     3921.15       79.53 o  4.614340  
   1   1  -1     3978.77     3921.14       79.52 o  4.614340  
   2   1   0     6905.14     6990.54      142.74 o  4.080914  
   2   1   1      259.81      230.71        7.64 o  3.740351  
   2   1  -1      259.81      230.71        7.50 o  3.740351  
   0   1  -2      107.04      135.56       11.30 o  3.698842  
   0   1   2      107.04      135.56       11.54 o  3.698842  
   2   0  -2      309.87      276.31       12.30 o  3.571132  
   2   0   2      309.86      276.31       12.34 o  3.571132  
   1   1   2     2024.27     1930.65       40.83 o  3.507958  
   1   1  -2     2024.27     1930.65       40.83 o  3.507958  
   3   1   0     1825.00     1529.66       36.78 o  3.148131  
   2   1  -2    11219.12    11497.34      232.57 o  3.074734  
   2   1   2    11219.12    11497.35      232.59 o  3.074734  
   0   2   0        6.50        7.37        0.51 o  3.022683  
   3   1  -1     2934.96     2704.93       57.10 o  2.983638  
   3   1   1     2934.97     2704.93       57.14 o  2.983638  
   1   2   0       34.41       94.70       24.12 o  2.915803  
   1   2   1       42.73       51.84        1.50 o  2.783658  
   1   2  -1       42.73       51.84        1.58 o  2.783658  
   4   0   0    14370.39    13828.61      290.85 o  2.765696  
   2   0   3     2194.45     2188.92       52.81 o  2.715881  
   2   0  -3     2194.45     2188.92       52.53 o  2.715881  
   1   1   3     2858.31     2875.73       61.52 o  2.687781  
   1   1  -3     2858.32     2875.74       61.42 o  2.687781  
   2   2   0        0.03        0.03        0.00 o  2.652478  
   4   0   1     1982.38     1981.83       49.34 o  2.652164  
   4   0  -1     1982.38     1981.83       49.39 o  2.652164  
   3   1  -2     3608.83     3269.76       69.26 o  2.611491  
   3   1   2     3608.84     3269.77       69.47 o  2.611491  
   2   2   1     5032.44     5131.36      106.54 o  2.551836  
   2   2  -1     5032.44     5131.36      107.10 o  2.551836  
   0   2  -2      621.53      608.63       13.95 o  2.538537  
   0   2   2      621.53      608.63       13.94 o  2.538537  
   4   1   0       22.92       18.13        3.48 o  2.514999  
   2   1  -3      636.23      619.88       16.30 o  2.477365  
   2   1   3      636.23      619.88       16.10 o  2.477365  
   1   2   2      413.65      407.77       10.49 o  2.474232  
   1   2  -2      413.65      407.77       10.81 o  2.474232  
   4   1  -1      614.70      542.37       17.66 o  2.428719  
   4   1   1      614.70      542.37       17.67 o  2.428719  
   4   0   2    13928.14    13666.69      282.86 o  2.380520  
   4   0  -2    13928.13    13666.69      282.97 o  2.380520  
   0   0  -4     9261.09     9810.29      215.38 o  2.338152  
   0   0   4     9261.09     9810.29      216.07 o  2.338152  
   3   2   0      733.88      779.08       17.14 o  2.337699  
   2   2  -2     7678.99     8103.70      167.36 o  2.307170  
   2   2   2     7678.98     8103.70      167.32 o  2.307170  
   3   2  -1      570.51      517.98       18.57 o  2.267927  
   3   2   1      570.51      517.98       18.35 o  2.267927  
   3   1  -3     2053.47     1914.74       44.56 o  2.215168  
   3   1   3     2053.47     1914.74       44.52 o  2.215168  
   4   1  -2      178.16      166.12        3.87 o  2.214979  
   4   1   2      178.16      166.13        3.85 o  2.214979  
   0   1  -4      273.20      272.13       21.98 o  2.180727  
   0   1   4      273.20      272.13       21.57 o  2.180727  
   2   0  -4    11524.95    12051.57      253.59 o  2.153648  
   2   0   4    11524.95    12051.57      253.65 o  2.153648  
   1   1   4     2226.87     2280.68       51.67 o  2.139555  
   1   1  -4     2226.87     2280.68       51.56 o  2.139555  
   1   2   3      199.47      208.27        6.30 o  2.129532  
   1   2  -3      199.47      208.27        6.13 o  2.129532  
   3   2   2      540.33      713.16       25.69 o  2.090982  
   3   2  -2      540.33      713.16       25.31 o  2.090982  
   5   1   0     1599.03     1451.48       40.36 o  2.077770  
   4   0   3     2236.14     2358.08       62.32 o  2.068901  
   4   0  -3     2236.14     2358.09       62.25 o  2.068901  
   4   2   0    13757.71    13734.16      288.30 o  2.040457  
   2   1   4      282.45      289.27        6.30 o  2.028755  
   2   1  -4      282.45      289.27        6.31 o  2.028755  
   5   1   1     1868.60     1913.73       41.72 o  2.028319  
   5   1  -1     1868.60     1913.73       41.68 o  2.028319  
   2   2   3     3252.02     3608.29       78.21 o  2.020205  
   2   2  -3     3252.02     3608.28       78.11 o  2.020205  
   0   3   0      998.57     1186.07       26.65 o  2.015122  
   4   2  -1      699.92      762.96       24.80 o  1.993564  
   4   2   1      699.92      762.97       24.72 o  1.993564  
   1   3   0     2900.10     2978.57       79.46 o  1.982501  
   4   1  -3      622.74      589.15       24.75 o  1.957445  
   4   1   3      622.74      589.15       24.78 o  1.957445  
   1   3  -1     1516.46     1550.45       42.41 o  1.939408  
   1   3   1     1516.46     1550.45       42.39 o  1.939408  
   5   1   2     3074.56     2796.21       64.51 o  1.898778  
   5   1  -2     3074.55     2796.21       64.54 o  1.898778  
   2   3   0      853.17      780.41       18.59 o  1.893391  
   3   1   4     1871.69     1881.26       40.26 o  1.877068  
   3   1  -4     1871.69     1881.27       40.40 o  1.877068  
   3   2   3      143.33      144.19        2.96 o  1.870290  
   3   2  -3      143.33      144.19        3.09 o  1.870290  
   4   2   2     7639.15     7684.94      161.13 o  1.870176  
   4   2  -2     7639.15     7684.94      161.29 o  1.870176  
   2   3   1      943.67     1032.77       23.94 o  1.855744  
   2   3  -1      943.67     1032.77       23.34 o  1.855744  
   0   3  -2     3772.06     4099.11       89.90 o  1.850611  
   0   3   2     3772.06     4099.11       91.65 o  1.850611  
   0   2  -4     3623.29     3921.94       87.54 o  1.849421  
   0   2   4     3623.29     3921.94       87.20 o  1.849421  
   6   0   0      260.71      281.33        6.84 o  1.843797  
   1   3   2     1657.93     1828.01       48.25 o  1.825249  
   1   3  -2     1657.93     1828.00       49.33 o  1.825249  
   1   2  -4      141.84      156.63        4.18 o  1.824107  
   1   2   4      141.84      156.63        4.21 o  1.824107  
   6   0   1      668.43      688.57       48.32 o  1.808979  
   6   0  -1      668.43      688.57       48.23 o  1.808979  
   4   0   4     1699.32     1858.79       61.11 o  1.785566  
   4   0  -4     1699.32     1858.79       60.98 o  1.785566  
   5   2   0      509.55      553.54       18.12 o  1.785364  
   2   0  -5     4864.36     5058.82      117.03 o  1.771947  
   2   0   5     4864.36     5058.82      117.43 o  1.771947  
   3   3   0     1345.89     1406.03       31.43 o  1.768319  
   1   1   5     1912.27     1915.14       43.94 o  1.764073  
   1   1  -5     1912.27     1915.14       44.11 o  1.764073  
   6   1   0     1350.77     1343.78       31.21 o  1.763595  
   2   3  -2       96.89       80.51        2.94 o  1.754994  
   2   3   2       96.89       80.51        2.87 o  1.754994  
   2   2  -4       90.03       72.47        2.84 o  1.753979  
   2   2   4       90.03       72.47        2.85 o  1.753979  
   5   2   1      506.38      407.62       16.12 o  1.753697  
   5   2  -1      506.37      407.62       15.92 o  1.753697  
   3   3   1     1960.51     1829.01       47.52 o  1.737535  
   3   3  -1     1960.51     1829.01       48.22 o  1.737535  
   6   1   1      220.01      205.09        5.03 o  1.733053  
   6   1  -1      220.01      205.09        5.17 o  1.733053  
   5   1   3     1667.82     1601.50       42.46 o  1.728959  
   5   1  -3     1667.81     1601.50       42.61 o  1.728959  
   6   0  -2      205.71      106.39       15.33 o  1.715282  
   6   0   2      205.71      106.39       15.28 o  1.715282  
   4   1  -4      190.84       97.88       13.61 o  1.712433  
   4   1   4      190.84       97.88       13.64 o  1.712433  
   4   2   3       95.50       43.01        8.09 o  1.707281  
   4   2  -3       95.50       43.01        8.13 o  1.707281  
   2   1   5       80.40       40.23       16.81 <  1.700409  
   2   1  -5       80.41       40.24       16.10 <  1.700409  
   1   3  -3      686.68      573.30       30.09 o  1.672896  
   1   3   3      686.68      573.30       29.85 o  1.672896  
   5   2  -2      128.36      116.99        6.40 o  1.667936  
   5   2   2      128.36      116.99        6.62 o  1.667936  
   3   3   2     1585.66     1526.30       37.28 o  1.654012  
   3   3  -2     1585.66     1526.30       36.76 o  1.654012  
   3   2  -4      180.26      173.37        4.19 o  1.653163  
   3   2   4      180.26      173.37        4.17 o  1.653163  
   6   1   2     2306.99     2195.50       53.13 o  1.650145  
   6   1  -2     2306.99     2195.49       53.10 o  1.650145  
   4   3   0      277.84      247.92       45.25 o  1.628663  
   2   3   3      639.62      583.74       32.64 o  1.618308  
   2   3  -3      639.62      583.74       32.57 o  1.618308  
   3   1  -5     1318.95     1378.94       47.37 o  1.608081  
   3   1   5     1318.95     1378.93       47.39 o  1.608081  
   4   3   1      100.32      107.35        3.90 o  1.604516  
   4   3  -1      100.32      107.35        3.91 o  1.604516  
   6   0   3    10052.02     9649.37      223.75 o  1.587013  
   6   0  -3    10052.01     9649.36      224.01 o  1.587013  
   1   2   5      211.28      217.52       20.74 o  1.574405  
   1   2  -5      211.27      217.52       20.75 o  1.574405  
   6   2   0       69.89       71.87        7.01 o  1.574065  
   0   0  -6     2613.45     2545.27       71.20 o  1.558768  
   0   0   6     2613.45     2545.27       70.68 o  1.558768  
   5   1  -4     1417.26     1371.54       31.91 o  1.553138  
   5   1   4     1417.26     1371.54       31.73 o  1.553138  
   6   2   1     3265.33     3157.77       73.71 o  1.552235  
   6   2  -1     3265.33     3157.77       72.86 o  1.552235  
   4   0   5      103.90      101.16        2.40 o  1.549423  
   4   0  -5      103.90      101.16        2.39 o  1.549423  
   5   2   3      303.84      295.83        6.97 o  1.549291  
   5   2  -3      303.84      295.83        7.02 o  1.549291  
   3   3  -3     1292.83     1288.70       28.33 o  1.538113  
   3   3   3     1292.83     1288.70       28.53 o  1.538113  
   4   3  -2     2464.76     2445.80       54.30 o  1.538050  
   4   3   2     2464.76     2445.80       53.33 o  1.538050  
   4   2   4     2753.02     2710.43       59.72 o  1.537367  
   4   2  -4     2753.02     2710.43       59.39 o  1.537367  
   6   1   3      890.69      878.95       19.28 o  1.535002  
   6   1  -3      890.69      878.96       19.00 o  1.535002  
   7   1   0     1980.45     2053.11       44.91 o  1.529013  
   2   2   5     4484.43     4650.59      101.90 o  1.528649  
   2   2  -5     4484.43     4650.59      101.92 o  1.528649  
   0   3   4     4170.43     4415.85       96.39 o  1.526443  
   0   3  -4     4170.43     4415.85       98.01 o  1.526443  
   1   3   4     1736.93     1736.20       39.48 o  1.512117  
   1   3  -4     1736.92     1736.19       38.76 o  1.512117  
   0   4   0     8575.30     8590.80      192.60 o  1.511341  
   0   1  -6     3630.93     3665.91       82.05 o  1.509400  
   0   1   6     3630.93     3665.91       82.59 o  1.509400  
   7   1  -1     1369.18     1383.37       31.05 o  1.508981  
   7   1   1     1369.18     1383.37       31.08 o  1.508981  
   4   1   5        1.21        1.31        0.04 o  1.500910  
   4   1  -5        1.21        1.31        0.04 o  1.500910  
   2   0  -6     1952.10     2106.57       57.63 o  1.500332  
   2   0   6     1952.10     2106.57       57.59 o  1.500332  
   1   4   0     1398.84     1392.86       35.95 o  1.497432  
   1   1  -6     1291.26     1244.83       31.61 o  1.495543  
   1   1   6     1291.26     1244.84       31.21 o  1.495543  
   6   2  -2     1818.95     1692.95       44.79 o  1.491819  
   6   2   2     1818.95     1692.96       44.90 o  1.491819  
   5   3   0      632.41      571.68       16.12 o  1.489826  
   1   4  -1     1046.34     1157.01       46.77 o  1.478600  
   1   4   1     1046.34     1157.01       46.73 o  1.478600  
   2   3   4      487.04      450.74       16.10 o  1.471443  
   2   3  -4      487.04      450.74       16.12 o  1.471443  
   5   3  -1     1119.34     1035.90       36.68 o  1.471277  
   5   3   1     1119.34     1035.90       37.40 o  1.471277  
   3   2   5      275.18      317.88       18.98 o  1.460521  
   3   2  -5      275.18      317.88       18.91 o  1.460521  
   2   4   0       23.08       25.59        1.13 o  1.457901  
   2   1   6      426.39      458.10       18.01 o  1.456158  
   2   1  -6      426.39      458.10       18.00 o  1.456158  
   7   1   2      877.38      890.84       32.30 o  1.453300  
   7   1  -2      877.38      890.85       32.67 o  1.453300  
   6   0  -4     2466.79     2330.49       80.01 o  1.447801  
   6   0   4     2466.80     2330.49       79.87 o  1.447801  
   4   3   3      322.62      329.04        9.12 o  1.443545  
   4   3  -3      322.62      329.04        9.12 o  1.443545  
   2   4  -1     1822.69     1905.63       51.39 o  1.440505  
   2   4   1     1822.69     1905.62       51.58 o  1.440505  
   0   4  -2     2555.02     2728.12       75.20 o  1.438100  
   0   4   2     2555.02     2728.12       75.02 o  1.438100  
   1   4   2      599.63      686.92       38.31 o  1.426101  
   1   4  -2      599.63      686.92       37.30 o  1.426101  
   5   3   2     1060.44     1138.33       48.82 o  1.419526  
   5   3  -2     1060.44     1138.32       47.84 o  1.419526  
   5   2   4      135.55      144.99        6.25 o  1.418989  
   5   2  -4      135.55      144.99        6.15 o  1.418989  
   3   3   4      973.30      908.22       27.61 o  1.410386  
   3   3  -4      973.30      908.22       28.41 o  1.410386  
   6   1   4       57.40       55.68        1.50 o  1.407986  
   6   1  -4       57.41       55.69        1.50 o  1.407986  
   6   2   3     3211.70     3101.10       83.15 o  1.405118  
   6   2  -3     3211.70     3101.11       83.26 o  1.405118  
   7   2   0        0.27        0.29        0.01 o  1.400520  
   3   4   0       31.37       33.14        1.13 o  1.398448  
   3   1  -6     1282.87     1281.07       41.76 o  1.396909  
   3   1   6     1282.87     1281.07       42.25 o  1.396909  
   2   4   2     1245.27     1166.26       31.90 o  1.391829  
   2   4  -2     1245.27     1166.26       31.89 o  1.391829  
   5   1  -5     1000.93      952.69       24.44 o  1.390172  
   5   1   5     1000.93      952.68       24.66 o  1.390172  
   0   2   6     7223.90     7067.30      163.64 o  1.385401  
   0   2  -6     7223.90     7067.30      163.11 o  1.385401  
   7   2   1      124.35      121.76        2.87 o  1.385077  
   7   2  -1      124.35      121.76        2.77 o  1.385077  
   3   4   1      179.70      178.56        4.25 o  1.383072  
   3   4  -1      179.70      178.56        4.08 o  1.383072  
   8   0   0    11512.44    11468.79      268.27 o  1.382848  
   4   2  -5      103.20      102.52        2.80 o  1.378828  
   4   2   5      103.20      102.52        2.81 o  1.378828  
   1   2  -6      382.62      367.54       12.46 o  1.374664  
   1   2   6      382.62      367.55       12.41 o  1.374664  
   7   1   3     1640.10     1545.33       52.22 o  1.372792  
   7   1  -3     1640.11     1545.34       52.32 o  1.372792  
   8   0   1     1057.15      958.02       41.02 o  1.367976  
   8   0  -1     1057.15      958.02       40.85 o  1.367976  
   1   3  -5      932.81      987.56       33.04 o  1.360524  
   1   3   5      932.80      987.56       33.47 o  1.360524  
   6   3   0      112.99      120.60        4.02 o  1.360305  
   4   0  -6     2845.06     3067.97      101.45 o  1.357941  
   4   0   6     2845.06     3067.97      101.62 o  1.357941  
   1   4  -3      475.45      344.59       11.98 o  1.349798  
   1   4   3      475.45      344.59       11.73 o  1.349798  
   8   1   0      214.95      166.84        4.92 o  1.348030  
   6   3   1     1623.31     1300.89       35.98 o  1.346141  
   6   3  -1     1623.30     1300.89       36.81 o  1.346141  
   5   3  -3     1746.63     1417.37       39.14 o  1.344220  
   5   3   3     1746.63     1417.37       39.12 o  1.344220  
   2   2  -6      470.91      384.02       10.61 o  1.343890  
   2   2   6      470.91      384.02       10.59 o  1.343890  
   7   2  -2      134.23      118.37        3.29 o  1.341642  
   7   2   2      134.23      118.37        3.26 o  1.341642  
   3   4  -2      386.44      388.99       11.27 o  1.339820  
   3   4   2      386.44      388.99       10.89 o  1.339820  
   4   3   4     1829.03     1871.07       59.71 o  1.336409  
   4   3  -4     1829.03     1871.07       58.09 o  1.336409  
   8   1   1      402.60      420.55       13.67 o  1.334242  
   8   1  -1      402.60      420.55       13.65 o  1.334242  
   2   3   5      368.79      331.10       12.39 o  1.330670  
   2   3  -5      368.79      331.10       12.69 o  1.330670  
   4   4   0        9.05        8.01        0.26 o  1.326239  
   8   0  -2     1219.57     1079.26       32.22 o  1.326082  
   8   0   2     1219.57     1079.26       32.69 o  1.326082  
   4   1  -6     2214.81     1977.36       58.16 o  1.324926  
   4   1   6     2214.81     1977.35       57.65 o  1.324926  
   2   4   3     1386.57     1309.58       42.26 o  1.320630  
   2   4  -3     1386.57     1309.58       42.30 o  1.320630  
   6   0   5      953.31      875.32       78.25 o  1.313108  
   6   0  -5      953.31      875.32       80.57 o  1.313108  
   4   4   1       73.08       67.10        6.09 o  1.313103  
   4   4  -1       73.08       67.10        6.07 o  1.313103  
   6   3   2      216.06      160.14       31.06 o  1.306164  
   6   3  -2      216.06      160.14       31.23 o  1.306164  
   6   2  -4       25.53       17.81        3.44 o  1.305745  
   6   2   4       25.53       17.81        3.52 o  1.305745  
   2   0  -7     1497.17     1586.73       73.76 o  1.298737  
   2   0   7     1497.17     1586.73       72.99 o  1.298737  
   3   2   6        4.42        4.69        0.21 o  1.296896  
   3   2  -6        4.42        4.69        0.21 o  1.296896  
   1   1   7      959.40     1025.44       46.41 o  1.295627  
   1   1  -7      959.40     1025.45       46.54 o  1.295627  
   8   1  -2       16.21       17.47        0.80 o  1.295286  
   8   1   2       16.21       17.47        0.80 o  1.295286  
   5   2   5       14.63       13.15        0.87 o  1.291499  
   5   2  -5       14.63       13.15        0.97 o  1.291499  
   3   3  -5     1711.77     1615.96       61.59 o  1.285003  
   3   3   5     1711.78     1615.96       61.54 o  1.285003  
   6   1   5      245.64      230.98        8.20 o  1.283187  
   6   1  -5      245.64      230.98        8.38 o  1.283187  
   7   1  -4      916.29      880.61       31.48 o  1.279682  
   7   1   4      916.29      880.61       31.71 o  1.279682  
   7   2  -3      204.20      201.71        7.41 o  1.277528  
   7   2   3      204.20      201.71        7.56 o  1.277528  
   3   4   3      339.88      345.95       13.40 o  1.275954  
   3   4  -3      339.88      345.95       12.91 o  1.275954  
   4   4   2      934.80      951.50       36.37 o  1.275918  
   4   4  -2      934.80      951.51       36.01 o  1.275918  
   2   1   7      138.07      147.94        8.19 o  1.269766  
   2   1  -7      138.07      147.94        7.95 o  1.269766  
   0   4  -4     1462.56     1506.72       84.67 o  1.269268  
   0   4   4     1462.56     1506.72       85.67 o  1.269268  
   8   0  -3     1858.01     1611.12       92.06 o  1.264072  
   8   0   3     1858.01     1611.12       91.74 o  1.264072  
   1   4  -4      263.29      238.83       13.82 o  1.260996  
   1   4   4      263.29      238.83       13.89 o  1.260996  
   8   2   0      123.75      129.94        8.18 o  1.257500  
   5   3  -4      785.95      817.32       54.56 o  1.256444  
   5   3   4      785.95      817.32       53.80 o  1.256444  
   5   4   0       14.30       12.12        0.54 o  1.247981  
   5   1   6      894.38      764.63       33.04 o  1.246887  
   5   1  -6      894.38      764.63       32.65 o  1.246887  
   6   3   3      367.12      314.87       13.41 o  1.246784  
   6   3  -3      367.12      314.87       13.54 o  1.246784  
   8   2  -1      675.95      580.79       24.77 o  1.246285  
   8   2   1      675.95      580.79       24.84 o  1.246285  
   7   3   0      288.06      256.70       11.67 o  1.243568  
   4   2   6      157.47      119.93        8.74 o  1.238683  
   4   2  -6      157.47      119.93        9.92 o  1.238683  
   8   1  -3      552.72      409.53       26.67 o  1.237312  
   8   1   3      552.72      409.53       26.72 o  1.237312  
   2   4   4       42.45       31.45        2.06 o  1.237116  
   2   4  -4       42.45       31.45        2.05 o  1.237116  
   5   4   1       39.80       29.49        1.84 o  1.237017  
   5   4  -1       39.80       29.49        2.03 o  1.237017  
   0   3   6      373.67      322.66       13.16 o  1.232947  
   0   3  -6      373.67      322.66       13.05 o  1.232947  
   7   3   1      837.19      724.54       30.09 o  1.232719  
   7   3  -1      837.19      724.54       29.12 o  1.232719  
   3   1   7      837.93      784.05       27.03 o  1.229905  
   3   1  -7      837.93      784.05       27.04 o  1.229905  
   4   3   5      768.72      774.95       25.84 o  1.228308  
   4   3  -5      768.72      774.95       25.85 o  1.228308  
   1   3   6     1584.16     1712.61       61.47 o  1.225361  
   1   3  -6     1584.15     1712.61       61.47 o  1.225361  
   4   4   3       77.40      100.65        7.13 o  1.220397  
   4   4  -3       77.39      100.65        7.09 o  1.220397  
   1   2   7       58.13       73.19        4.12 o  1.214640  
   1   2  -7       58.12       73.19        4.16 o  1.214640  
   8   2   2     1032.26     1304.39       73.88 o  1.214360  
   8   2  -2     1032.26     1304.38       72.76 o  1.214360  
   0   5   0     1566.79     1587.64       76.86 o  1.209073  
   5   4   2      425.98      420.04       12.50 o  1.205781  
   5   4  -2      425.98      420.04       12.78 o  1.205781  
   9   1   0     1139.79     1138.55       32.38 o  1.204551  
   6   2  -5       51.72       51.80        1.42 o  1.204373  
   6   2   5       51.72       51.80        1.55 o  1.204373  
   2   3   6     1477.97     1472.38       41.18 o  1.203414  
   2   3  -6     1477.97     1472.38       41.18 o  1.203414  
   4   0  -7      475.39      473.01       13.29 o  1.203058  
   4   0   7      475.39      473.01       13.23 o  1.203058  
   1   5   0     2033.49     2034.92       57.38 o  1.201916  
   7   3   2      836.94      841.21       23.83 o  1.201799  
   7   3  -2      836.95      841.21       23.82 o  1.201799  
   7   2  -4       35.28       35.57        1.04 o  1.201473  
   7   2   4       35.28       35.57        0.99 o  1.201473  
   3   4  -4      222.20      229.50        6.86 o  1.200164  
   3   4   4      222.20      229.49        6.81 o  1.200164  
   9   1   1      854.25      799.91       26.31 o  1.194683  
   9   1  -1      854.25      799.91       26.52 o  1.194683  
   2   2   7     1063.77     1005.73       31.54 o  1.193255  
   2   2  -7     1063.78     1005.73       31.62 o  1.193255  
   1   5   1      701.66      670.78       20.69 o  1.192113  
   1   5  -1      701.66      670.78       20.72 o  1.192113  
   6   0   6      305.27      299.12        9.44 o  1.190377  
   6   0  -6      305.27      299.12        9.45 o  1.190377  
   8   0   4     2985.48     2934.39       93.50 o  1.190260  
   8   0  -4     2985.49     2934.39       94.37 o  1.190260  
   7   1  -5      820.97      803.79       46.29 o  1.183829  
   7   1   5      820.97      803.79       46.28 o  1.183829  
   2   5   0     1092.48     1086.99       64.75 o  1.181185  
   4   1   7       66.76       65.53        4.41 o  1.179920  
   4   1  -7       66.76       65.53        4.39 o  1.179920  
   6   3   4      210.75      203.76       16.71 o  1.175793  
   6   3  -4      210.75      203.76       16.79 o  1.175793  
   5   2   6        5.68        5.88        0.37 o  1.174208  
   5   2  -6        5.68        5.88        0.37 o  1.174208  
   2   5  -1      754.56      831.05       39.31 o  1.171876  
   2   5   1      754.56      831.05       39.68 o  1.171876  
   0   5   2      532.03      600.08       26.22 o  1.170580  
   0   5  -2      532.03      600.08       25.97 o  1.170580  
   3   3   6      149.68      168.33        6.95 o  1.169320  
   3   3  -6      149.68      168.34        6.88 o  1.169320  
   0   0  -8      768.91      862.66       35.15 o  1.169076  
   0   0   8      768.91      862.66       35.41 o  1.169076  
   1   4  -5      146.47      164.33        6.77 o  1.168989  
   1   4   5      146.47      164.33        6.67 o  1.168989  
   6   4   0       23.56       26.41        1.09 o  1.168849  
   6   1   6      232.10      262.42       10.86 o  1.167951  
   6   1  -6      232.10      262.42       10.85 o  1.167951  
   8   1  -4       44.11       49.87        2.00 o  1.167840  
   8   1   4       44.11       49.87        2.12 o  1.167840  
   9   1   2      533.42      605.80       26.87 o  1.166474  
   9   1  -2      533.42      605.80       26.91 o  1.166474  
   8   2   3      151.86      172.02        7.80 o  1.166202  
   8   2  -3      151.87      172.02        7.73 o  1.166202  
   5   3  -5      314.79      354.55       17.47 o  1.165359  
   5   3   5      314.78      354.55       16.56 o  1.165359  
   1   5   2        7.56        8.37        0.34 o  1.164081  
   1   5  -2        7.56        8.37        0.54 o  1.164081  
   3   2   7       48.88       51.36        3.21 o  1.159993  
   3   2  -7       48.88       51.36        3.32 o  1.159993  
   6   4   1      706.63      746.46       45.64 o  1.159827  
   6   4  -1      706.63      746.46       46.23 o  1.159827  
   5   4   3      174.33      174.15        9.85 o  1.158598  
   5   4  -3      174.33      174.15        9.64 o  1.158598  
   7   3   3      755.53      734.75       34.56 o  1.155064  
   7   3  -3      755.53      734.75       34.78 o  1.155064  
   4   4   4      874.22      858.92       40.04 o  1.153585  
   4   4  -4      874.22      858.93       40.87 o  1.153585  
   2   4   5      587.63      607.57       31.27 o  1.149888  
   2   4  -5      587.63      607.57       31.16 o  1.149888  
   3   5   0       16.48       16.69        0.88 o  1.148895  
   0   1  -8      443.06      442.40       21.94 o  1.147810  
   0   1   8      443.06      442.40       22.36 o  1.147810  
   2   5  -2     1164.73     1058.49       49.14 o  1.145216  
   2   5   2     1164.73     1058.49       49.19 o  1.145216  
   2   0   8      144.82      128.90        5.58 o  1.143808  
   2   0  -8      144.82      128.90        5.57 o  1.143808  
   1   1  -8      749.96      663.20       29.89 o  1.141682  
   1   1   8      749.97      663.20       29.89 o  1.141682  
   3   5   1      513.59      447.40       21.98 o  1.140323  
   3   5  -1      513.59      447.40       22.36 o  1.140323  
   8   3   0      771.07      671.83       33.25 o  1.140197  
   9   2   0        2.15        1.91        0.11 o  1.138649  
   6   4   2      453.55      344.55       53.08 o  1.133963  
   6   4  -2      453.55      344.55       53.29 o  1.133963  
   8   3   1       32.35       24.97        4.21 o  1.131817  
   8   3  -1       32.35       24.97        4.25 o  1.131817  
   9   2  -1       37.40       30.22        5.51 o  1.130303  
   9   2   1       37.40       30.22        5.07 o  1.130303  
   4   3   6      173.54      173.23        8.97 o  1.126114  
   4   3  -6      173.54      173.23        8.83 o  1.126114  
   2   1   8      449.96      465.35       20.94 o  1.123869  
   2   1  -8      449.96      465.35       20.94 o  1.123869  
   5   1   7      652.18      674.08       30.56 o  1.123794  
   5   1  -7      652.18      674.08       30.24 o  1.123794  
   9   1   3      487.29      503.90       22.77 o  1.123597  
   9   1  -3      487.29      503.90       22.49 o  1.123597  
   1   5   3      421.97      448.26       20.70 o  1.121458  
   1   5  -3      421.97      448.26       20.55 o  1.121458  
   7   2   5        2.12        2.24        0.09 o  1.121098  
   7   2  -5        2.12        2.24        0.12 o  1.121098  
   3   4   5      151.40      161.98        8.08 o  1.120034  
   3   4  -5      151.40      161.98        8.04 o  1.120034  
   4   2  -7       17.79       19.55        1.15 o  1.117777  
   4   2   7       17.79       19.55        1.15 o  1.117777  
   3   5   2     1189.64     1236.28       79.99 o  1.115715  
   3   5  -2     1189.64     1236.28       79.57 o  1.115715  
   8   0   5       37.77       33.49        2.48 o  1.111971  
   8   0  -5       37.77       33.49        2.45 o  1.111971  
   1   3   7      453.30      388.95       18.27 o  1.107958  
   1   3  -7      453.30      388.95       17.98 o  1.107958  
   4   5   0      212.18      182.28        8.42 o  1.107836  
   8   3  -2       73.78       63.38        2.75 o  1.107745  
   8   3   2       73.78       63.38        3.10 o  1.107745  
   6   2   6      233.41      201.10        9.22 o  1.107584  
   6   2  -6      233.41      201.10        9.15 o  1.107584  
   8   2   4      781.63      673.44       30.45 o  1.107490  
   8   2  -4      781.63      673.44       31.15 o  1.107490  
   9   2   2      199.68      172.91        7.73 o  1.106325  
   9   2  -2      199.68      172.91        7.69 o  1.106325  
  10   0   0      171.43      148.45        6.62 o  1.106278  
   2   5  -3      696.76      595.36       27.51 o  1.104561  
   2   5   3      696.76      595.36       27.09 o  1.104561  
   5   4   4      206.05      153.04        6.12 o  1.100971  
   5   4  -4      206.05      153.04        6.15 o  1.100971  
   6   3   5      526.03      402.59       15.67 o  1.100148  
   6   3  -5      526.03      402.59       15.18 o  1.100148  
   4   5   1       63.62       48.69        1.86 o  1.100145  
   4   5  -1       63.62       48.69        1.87 o  1.100145  
  10   0  -1     3649.50     2923.74      104.13 o  1.098619  
  10   0   1     3649.50     2923.74      104.56 o  1.098619  
   7   3   4      493.94      399.30       14.28 o  1.097937  
   7   3  -4      493.94      399.29       13.99 o  1.097937  
   3   1   8      527.15      463.62       16.20 o  1.095947  
   3   1  -8      527.15      463.62       16.23 o  1.095947  
   6   4   3      899.81      859.46       32.18 o  1.094454  
   6   4  -3      899.81      859.46       32.19 o  1.094454  
   8   1   5       14.63       14.41        0.59 o  1.093625  
   8   1  -5       14.63       14.41        0.59 o  1.093625  
   7   4   0      385.57      369.47       17.05 o  1.092277  
   2   3   7      273.74      262.82       13.20 o  1.091655  
   2   3  -7      273.74      262.82       13.02 o  1.091655  
   7   1   6      549.11      527.20       26.10 o  1.091543  
   7   1  -6      549.11      527.20       26.50 o  1.091543  
   0   2   8      105.63      102.40        5.36 o  1.090364  
   0   2  -8      105.63      102.40        6.54 o  1.090364  
  10   1   0       10.18        8.93        0.78 o  1.088208  
   1   2  -8        3.36        3.21        0.25 o  1.085106  
   1   2   8        3.36        3.21        0.21 o  1.085106  
   0   4   6      135.64      132.98        8.67 o  1.085059  
   0   4  -6      135.64      132.98        9.67 o  1.085059  
   7   4   1      339.62      332.45       22.64 o  1.084903  
   7   4  -1      339.62      332.45       23.21 o  1.084903  
   6   0   7     2198.60     2188.45      112.49 o  1.081895  
   6   0  -7     2198.60     2188.46      111.36 o  1.081895  
   4   4   5       35.44       35.27        1.80 o  1.081892  
   4   4  -5       35.44       35.28        1.81 o  1.081892  
  10   1  -1      116.91      119.65        5.51 o  1.080915  
  10   1   1      116.91      119.65        5.64 o  1.080915  
   1   4  -6       17.13       18.51        0.79 o  1.079877  
   1   4   6       17.13       18.51        0.79 o  1.079877  
   3   5   3       60.51       66.13        2.96 o  1.078021  
   3   5  -3       60.51       66.13        2.63 o  1.078021  
   4   5   2      693.47      752.77       32.07 o  1.077999  
   4   5  -2      693.47      752.77       32.34 o  1.077999  
   5   3  -6      237.35      259.58       11.52 o  1.077014  
   5   3   6      237.35      259.59       11.30 o  1.077014  
   4   0   8     1623.05     1775.39       78.39 o  1.076824  
   4   0  -8     1623.05     1775.39       78.52 o  1.076824  
  10   0   2      160.38      177.24        7.91 o  1.076563  
  10   0  -2      160.38      177.24        7.79 o  1.076563  
   0   5   4      687.39      724.57       35.04 o  1.073979  
   0   5  -4      687.39      724.57       35.94 o  1.073979  
   8   3   3      208.54      209.63       11.84 o  1.070826  
   8   3  -3      208.54      209.63       11.86 o  1.070826  
   9   1   4      704.70      708.38       40.22 o  1.070806  
   9   1  -4      704.70      708.38       39.95 o  1.070806  
   2   2   8       55.74       54.38        3.11 o  1.069777  
   2   2  -8       55.74       54.38        3.08 o  1.069777  
   5   2   7       81.45       79.51        4.54 o  1.069713  
   5   2  -7       81.45       79.51        4.49 o  1.069713  
   9   2   3       23.69       23.12        1.32 o  1.069543  
   9   2  -3       23.69       23.12        1.31 o  1.069543  
   1   5   4      387.21      381.77       21.77 o  1.068954  
   1   5  -4      387.21      381.77       21.06 o  1.068954  
   3   3   7      394.44      396.27       24.97 o  1.066013  
   3   3  -7      394.43      396.27       25.79 o  1.066013  
   6   1   7      397.88      377.77       26.36 o  1.064976  
   6   1  -7      397.88      377.77       26.83 o  1.064976  
   2   4   6       19.20       18.24        1.30 o  1.064766  
   2   4  -6       19.20       18.24        1.29 o  1.064766  
   7   4   2      266.47      255.28       18.03 o  1.063647  
   7   4  -2      266.47      255.28       17.58 o  1.063647  
   5   5   0       69.16       70.39        5.22 o  1.060991  
   4   1   8      523.43      516.51       41.33 o  1.060137  
   4   1  -8      523.43      516.51       41.92 o  1.060137  
  10   1   2      398.85      396.40       32.41 o  1.059888  
  10   1  -2      398.85      396.40       32.38 o  1.059888  
   2   5  -4       42.48       44.30       16.81 <  1.054291  
   2   5   4       42.48       44.30       16.93 <  1.054291  
   5   5   1       70.74       71.14       30.96 <  1.054229  
   5   5  -1       70.74       71.14       28.16 <  1.054229  
   9   3   0      528.63      534.08      111.51 o  1.049377  
   3   2   8      161.36      139.84       13.37 o  1.045613  
   3   2  -8      161.36      139.84       13.34 o  1.045613  
   6   4   4       84.80       73.33        7.02 o  1.045491  
   6   4  -4       84.79       73.33        7.05 o  1.045491  
   4   5   3      110.85      103.67        8.02 o  1.043885  
   4   5  -3      110.85      103.67        7.99 o  1.043885  
   8   2   5      126.86      119.63        9.09 o  1.043595  
   8   2  -5      126.86      119.63        9.16 o  1.043595  
   9   3   1      486.72      473.78       33.91 o  1.042833  
   9   3  -1      486.72      473.78       35.02 o  1.042833  
  10   0   3        8.65        8.47        0.70 o  1.042581  
  10   0  -3        8.65        8.47        0.62 o  1.042581  
   7   2   6       73.26       72.69        5.18 o  1.041786  
   7   2  -6       73.26       72.69        5.08 o  1.041786  
   3   4   6      451.36      461.52       32.24 o  1.040932  
   3   4  -6      451.36      461.52       32.19 o  1.040932  
  10   2   0       37.73       43.35        2.86 o  1.038885  
   5   4   5      405.51      477.39       29.44 o  1.038135  
   5   4  -5      405.51      477.38       29.13 o  1.038135  
   7   3   5       36.56       40.55        1.86 o  1.035591  
   7   3  -5       36.56       40.55        2.02 o  1.035591  
   5   5   2      943.82     1027.62       45.98 o  1.034694  
   5   5  -2      943.83     1027.62       46.08 o  1.034694  
   8   0   6      523.76      570.99       25.78 o  1.034450  
   8   0  -6      523.76      570.99       25.01 o  1.034450  
   4   3   7      193.52      212.82        9.14 o  1.032971  
   4   3  -7      193.51      212.82        9.15 o  1.032971  
  10   2  -1      633.07      692.82       30.45 o  1.032534  
  10   2   1      633.07      692.82       29.54 o  1.032534  
   3   5   4      376.86      389.99       17.92 o  1.031138  
   3   5  -4      376.85      389.99       18.35 o  1.031138  
   7   4   3      326.40      333.55       15.83 o  1.030837  
   7   4  -3      326.40      333.55       16.28 o  1.030837  
  10   1   3      664.82      522.90       25.42 o  1.027415  
  10   1  -3      664.82      522.90       25.71 o  1.027415  
   6   3   6      583.10      457.77       18.92 o  1.024911  
   6   3  -6      583.10      457.77       18.92 o  1.024911  
   8   3   4      819.02      649.08       25.98 o  1.024836  
   8   3  -4      819.01      649.08       26.61 o  1.024836  
   9   3   2      759.50      612.06       22.90 o  1.023913  
   9   3  -2      759.50      612.06       22.94 o  1.023913  
   9   2   4       58.69       47.36        1.65 o  1.023712  
   9   2  -4       58.69       47.36        1.74 o  1.023712  
   2   0   9     1149.52     1075.70       31.98 o  1.021311  
   2   0  -9     1149.52     1075.70       31.60 o  1.021311  
   8   4   0     2697.40     2607.69       75.39 o  1.020229  
   1   1  -9      450.58      431.83       12.58 o  1.019797  
   1   1   9      450.58      431.83       12.53 o  1.019797  
   8   1   6      524.66      500.92       14.61 o  1.019631  
   8   1  -6      524.66      500.92       14.37 o  1.019631  
   5   1   8      556.46      529.23       15.18 o  1.018869  
   5   1  -8      556.47      529.23       15.18 o  1.018869  
   6   2   7     1788.76     1700.30       48.87 o  1.018614  
   6   2  -7     1788.76     1700.30       48.69 o  1.018614  
   4   2   8     3615.72     3384.25       96.04 o  1.014377  
   4   2  -8     3615.71     3384.25       95.55 o  1.014377  
   8   4   1       63.64       59.33        1.66 o  1.014212  
   8   4  -1       63.64       59.33        1.69 o  1.014212  
  10   2   2      269.04      251.27        7.02 o  1.014159  
  10   2  -2      269.04      251.27        7.07 o  1.014159  
   9   1   5      530.58      514.53       14.09 o  1.012731  
   9   1  -5      530.58      514.53       14.22 o  1.012731  
   0   3  -8     1228.74     1208.07       34.78 o  1.011221  
   0   3   8     1228.74     1208.07       33.91 o  1.011221  
   1   5   5      696.82      678.14       19.39 o  1.011164  
   1   5  -5      696.82      678.14       19.65 o  1.011164  
   6   5   0      399.27      388.56       11.18 o  1.011074  
   4   4   6     1753.18     1623.89       50.48 o  1.010102  
   4   4  -6     1753.18     1623.89       50.11 o  1.010102  
   0   6   0      590.34      613.11       22.69 o  1.007561  
   2   1  -9       19.93       20.15        0.83 o  1.007041  
   2   1   9       19.93       20.14        0.78 o  1.007041  
   1   3   8       24.53       24.79        1.15 o  1.007022  
   1   3  -8       24.53       24.79        0.84 o  1.007022  
   7   1   7      583.05      559.78       25.89 o  1.006094  
   7   1  -7      583.05      559.78       25.78 o  1.006094  
   6   5   1      425.29      404.32       19.71 o  1.005217  
   6   5  -1      425.29      404.32       20.40 o  1.005217  
   5   5   3      599.01      562.89       29.38 o  1.004417  
   5   5  -3      599.01      562.89       29.83 o  1.004417  
   1   6   0      225.32      211.93       11.43 o  1.003408  
   4   5   4      513.80      524.02       31.00 o  1.001145  
   4   5  -4      513.80      524.02       30.38 o  1.001145  
  10   0   4      152.04      153.52        8.12 o  0.999995  
  10   0  -4      152.04      153.52        8.02 o  0.999995  
   2   5  -5      418.17      374.10       16.22 o  0.998726  
   2   5   5      418.17      374.10       16.38 o  0.998726  
   1   6   1       81.79       77.18        2.96 o  0.997683  
   1   6  -1       81.79       77.18        2.66 o  0.997683  
   1   4  -7      200.86      191.61        6.55 o  0.996937  
   1   4   7      200.86      191.61        6.50 o  0.996937  
   8   4   2      741.51      708.68       23.70 o  0.996782  
   8   4  -2      741.50      708.68       24.05 o  0.996782  
   2   3   8     2473.94     2287.34       73.52 o  0.994735  
   2   3  -8     2473.94     2287.34       73.49 o  0.994735  
   5   3  -7      617.31      571.96       18.33 o  0.994683  
   5   3   7      617.31      571.96       18.24 o  0.994683  
   9   3   3       96.68       89.36        2.90 o  0.994546  
   9   3  -3       96.68       89.36        2.85 o  0.994546  
  11   1   0      265.73      266.04        8.81 o  0.992073  
   2   6   0      139.73      136.55        4.87 o  0.991250  
   6   4   5     1530.74     1495.86       53.20 o  0.991236  
   6   4  -5     1530.74     1495.86       53.46 o  0.991236  
   7   4   4      252.27      245.01        9.11 o  0.989618  
   7   4  -4      252.27      245.01        9.05 o  0.989618  
   6   5   2      516.85      526.51       18.66 o  0.988239  
   6   5  -2      516.85      526.51       18.65 o  0.988239  
   6   0   8      119.98      124.18        4.38 o  0.987334  
   6   0  -8      119.98      124.18        4.40 o  0.987334  
   3   1   9      573.21      594.17       21.27 o  0.986806  
   3   1  -9      573.21      594.17       21.16 o  0.986806  
  10   1   4       38.71       40.14        1.44 o  0.986589  
  10   1  -4       38.71       40.14        1.43 o  0.986589  
  11   1   1      580.14      603.19       21.59 o  0.986538  
  11   1  -1      580.14      603.19       21.74 o  0.986538  
   2   6   1      244.08      253.12        9.18 o  0.985729  
   2   6  -1      244.08      253.12        9.31 o  0.985729  
  10   2   3      431.26      446.37       16.37 o  0.985600  
  10   2  -3      431.26      446.37       16.41 o  0.985600  
   2   4   7      714.08      747.68       27.61 o  0.985011  
   2   4  -7      714.08      747.68       27.59 o  0.985011  
   0   6   2      887.32      930.76       34.47 o  0.984958  
   0   6  -2      887.32      930.76       34.76 o  0.984958  
   1   6   2      818.72      898.51       36.34 o  0.981077  
   1   6  -2      818.72      898.51       36.34 o  0.981077  
   3   5   5      166.51      175.91        6.91 o  0.978978  
   3   5  -5      166.51      175.91        6.58 o  0.978978  
   1   2   9       24.08       25.20        0.98 o  0.978869  
   1   2  -9       24.08       25.20        0.93 o  0.978869  
   8   2   6     1873.67     1953.53       73.77 o  0.978723  
   8   2  -6     1873.67     1953.53       73.19 o  0.978723  
   5   2   8      132.73      137.65        4.98 o  0.978049  
   5   2  -8      132.73      137.64        4.94 o  0.978049  
   3   3   8     1241.91     1124.02       37.07 o  0.975218  
   3   3  -8     1241.91     1124.02       37.24 o  0.975218  
   6   1   8      358.17      314.18       10.34 o  0.974423  
   6   1  -8      358.17      314.18       10.33 o  0.974423  
   5   4   6      437.14      382.53       12.54 o  0.974215  
   5   4  -6      437.14      382.53       12.62 o  0.974215  
   8   3   5     1100.37      954.10       31.37 o  0.973580  
   8   3  -5     1100.37      954.09       31.36 o  0.973580  
   4   0   9      256.00      223.51        7.40 o  0.972777  
   4   0  -9      256.00      223.51        7.38 o  0.972777  
   9   2   5       89.22       78.00        2.61 o  0.972616  
   9   2  -5       89.21       78.00        2.56 o  0.972616  
   7   3   6      565.76      490.15       16.61 o  0.972111  
   7   3  -6      565.76      490.15       16.53 o  0.972111  
   3   6   0     1884.97     1625.06       55.38 o  0.971934  
  11   1   2      451.04      394.81       15.00 o  0.970474  
  11   1  -2      451.04      394.81       14.84 o  0.970474  
  10   3   0        0.61        0.56        0.02 o  0.969753  
   2   6   2      128.12      118.10        4.77 o  0.969704  
   2   6  -2      128.12      118.10        4.76 o  0.969704  
   8   4   3      152.79      141.42        5.64 o  0.969627  
   8   4  -3      152.79      141.42        5.69 o  0.969627  
   2   2   9      630.52      630.24       30.88 o  0.967572  
   2   2  -9      630.51      630.23       30.91 o  0.967572  
   7   2   7       80.31       82.09        4.26 o  0.966732  
   7   2  -7       80.31       82.09        4.17 o  0.966732  
   3   6   1      345.06      352.70       18.14 o  0.966728  
   3   6  -1      345.06      352.70       18.10 o  0.966728  
   5   5   4      218.64      221.82       11.62 o  0.966172  
   5   5  -4      218.64      221.82       11.88 o  0.966172  
   3   4   7      139.88      141.11        7.58 o  0.966050  
   3   4  -7      139.88      141.11        7.53 o  0.966050  
  10   3   1      593.29      584.65       34.10 o  0.964581  
  10   3  -1      593.29      584.65       32.78 o  0.964581  
   6   5   3      460.93      436.55       32.07 o  0.961758  
   6   5  -3      460.93      436.55       30.50 o  0.961758  
   8   0   7      663.03      644.74       49.09 o  0.960862  
   8   0  -7      663.04      644.74       48.98 o  0.960862  
   4   1   9       57.55       56.22        4.27 o  0.960422  
   4   1  -9       57.55       56.22        4.27 o  0.960422  
   7   5   0      606.34      591.99       45.19 o  0.960280  
   9   3   4      275.29      273.70       16.95 o  0.957377  
   9   3  -4      275.29      273.70       17.20 o  0.957377  
   0   5   6     1117.97     1088.62       52.50 o  0.955364  
   0   5  -6     1117.97     1088.62       50.29 o  0.955364  
   7   5   1      181.62      176.61        8.57 o  0.955258  
   7   5  -1      181.62      176.61        8.16 o  0.955258  
   1   6   3      212.40      206.55        9.96 o  0.955153  
   1   6  -3      212.40      206.55        9.61 o  0.955153  
  11   2   0      131.36      128.50        6.14 o  0.954273  
   9   4   0      450.89      443.82       21.43 o  0.953617  
   6   3   7      165.47      163.28        7.85 o  0.953203  
   6   3  -7      165.47      163.28        8.17 o  0.953203  
   4   5   5        2.05        2.02        0.10 o  0.953201  
   4   5  -5        2.05        2.02        0.10 o  0.953201  
   9   1   6      490.18      483.70       23.64 o  0.953129  
   9   1  -6      490.18      483.70       23.83 o  0.953129  
